# Supplementary material for: Electro-catalytic multicomponent reaction toward asymmetrical biaryls through heteroarylation of in situ generated fused polycyclic heteroaromatics
Source: Royal Society of Chemistry journal article supplement (doi:10.1039/d3qo00307h), 2023-01-01

**Electro-catalytic multicomponent reaction to asymmetrical biaryls from  
heteroarylation of in-situ generated fused polycyclic heteroaromatics**

Wenjing Guan,<sup>a</sup> Jinlin Hang,<sup>a</sup> Yaqi Qiao,<sup>a</sup> Chengkou Liu,<sup>\*a</sup> Chengcheng Yuan,<sup>a</sup>

Jiawei Chen,<sup>a</sup> Hong Qin,<sup>a</sup> Zheng Fang,<sup>a</sup> Dong Ji,<sup>b</sup> and Kai Guo<sup>a,c</sup>

<sup>a</sup>College of Biotechnology and Pharmaceutical Engineering, Nanjing Tech University, Nanjing, 211816, China. E-mail: [liuchengkou@njtech.edu.cn](mailto:liuchengkou@njtech.edu.cn).

<sup>b</sup>Institute of Nanjing Advanced Biomaterials & Processing Equipment, Nanjing 211299, China.

<sup>c</sup>State Key Laboratory of Materials-Oriented Chemical Engineering, Nanjing Tech University, Nanjing, 211816, China.

Table of Contents

|    | Contents                                                                                 | Page    |
|----|------------------------------------------------------------------------------------------|---------|
| 1  | General Information                                                                      | S2      |
| 2  | General Material Information for Electrolysis Setup                                      | S2      |
| 3  | General Procedure for Electrosynthesis of Asymmetrical Biaryls                           | S3-S4   |
| 4  | Optimization of the Reaction of 2-Phenylimidazo[1,2- <i>a</i> ]pyridine<br>with <b>2</b> | S4      |
| 5  | Gram-Scale Synthesis of <b>3</b>                                                         | S5      |
| 6  | Unsuccessful Substrates                                                                  | S5-S13  |
| 7  | Mechanistic Studies                                                                      | S14-S24 |
| 8  | X-ray Crystallography Studies of Product <b>3</b>                                        | S24-S25 |
| 9  | Synthesis of Substrates                                                                  | S26     |
| 10 | Characterization Data for Electrolysis Products                                          | S27-S48 |
| 11 | References                                                                               | S48     |
| 12 | NMR Spectra for Electrolysis Products and <b>34-37, S5, S10</b>                          | S49-S86 |

## 1、 General Information

Commercially available reagents and solvents are of reagent grade quality without further purification. Flash column chromatography is performed using silicycle silica gel (200-300 mesh). Analytical thin-layer chromatography (TLC) is performed on 0.2 mm coated silica gel plates (HSGF 254) and visualized using a UV lamp (254 nm).  $^1\text{H}$  NMR and  $^{13}\text{C}$  NMR are recorded on magnet system 400'54 ascend purchased from Bruker Biospin AG. HRMS (ESI) spectra are recorded on Agilent Q-TOF 6520.

Catalyst- and oxidant-free multicomponent reaction to asymmetrical biaryls from electrochemical arylation of in-situ generated fused polycyclic heteroaromatics was carried out in an undivided cell equipped with a carbon cloth anode and a platinum plate cathode under open air. The carbon cloth, graphite rod ( $\varnothing$  6 mm) and platinum plate were purchased from Shanghai Jing Chong Electronic Technology Development Co., Ltd. Reticulated vitreous carbon (RVC) was purchased from Gaoss Union (Tianjin) Photoelectric Technology Co., Ltd. And, electrolysis was conducted under an AXIOMET AX3003P potentiostat in constant current mode. Cyclic voltammogram experiments were investigated using a Metrohm Autolab PGSTAT204 workstation and Nova 2.0 software.

## 2、 General Material Information for Electrolysis Setup

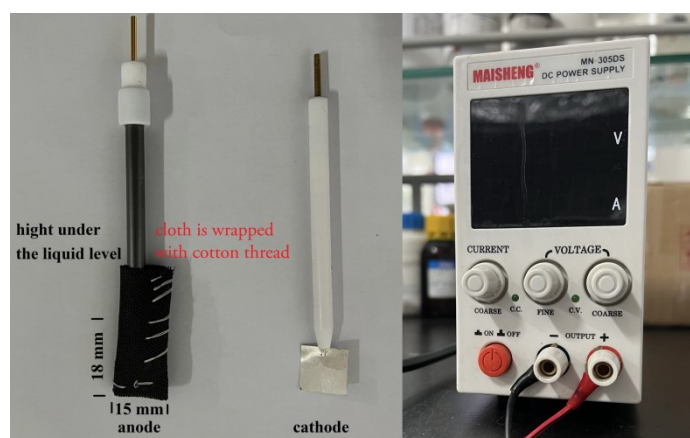

**Figure S1** Picture of DIY electrolysis setup

The DIY electrolysis setup used is shown in Fig. S1.

### 3、 General Procedure for Electrosynthesis of Asymmetrical Biaryls

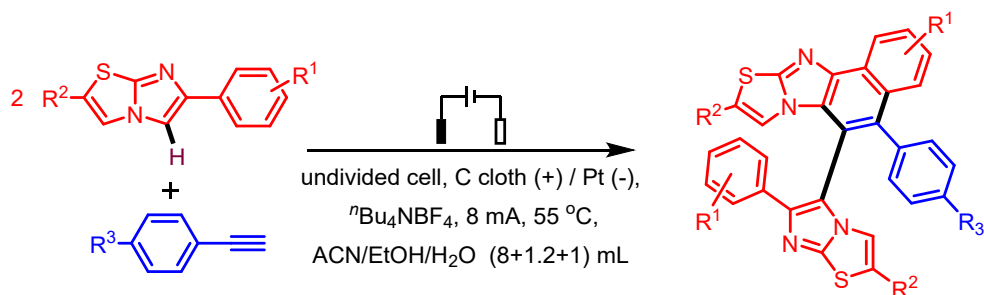

In an undivided cell equipped with a carbon cloth (35 mm x 15 mm) anode and a Pt (10 mm x 10 mm x 0.1 mm) cathode, imidazo[2,1-*b*]thiazoles (0.2 mmol), alkyne (0.2 mmol),  $t\text{Bu}_4\text{NBF}_4$  (0.2 mmol, 65.8 mg) were dissolved in a mixed solvent of ACN/EtOH/H<sub>2</sub>O (8+1.2+1) mL. The mixture above was stirred and electrolyzed at a constant current of 8 mA for 1.5 h under the open air. The reaction solution was diluted with ethyl acetate (50 mL) and washed with H<sub>2</sub>O (50 mL). The separated organic layer was dried over anhydrous Na<sub>2</sub>SO<sub>4</sub> and filtered. The filtrate was concentrated under reduced pressure to give the crude product, which was purified by column chromatographic separation (dichloromethane/ethyl acetate/petroleum ether: 10:2:30 to 10:22:30) to obtain the desired product.

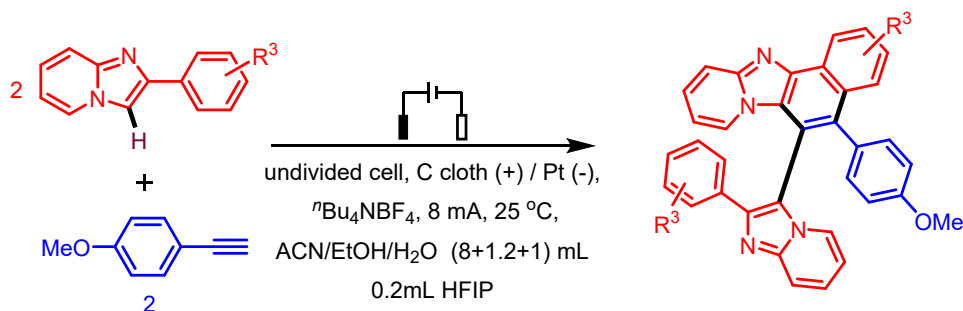

In an undivided cell equipped with a carbon cloth (35 mm x 15 mm) anode and a Pt (10 mm x 10 mm x 0.1 mm) cathode, 2-phenylimidazo[1,2-*a*]pyridines (0.2 mmol), 1-ethynyl-4-methoxybenzene **2** (0.2 mmol, 26.4 mg),  $t\text{Bu}_4\text{NBF}_4$  (0.2 mmol, 65.8 mg) were dissolved in a mixed solvent of ACN/EtOH/H<sub>2</sub>O (8+1.2+1) mL. Then, 0.2 mL HFIP was added. The mixture above was stirred and electrolyzed at a constant current of 8 mA for 1.5-2 h under the open air. The reaction solution was diluted with ethyl acetate (50 mL) and washed with H<sub>2</sub>O (50 mL). The separated organic layer was dried

over anhydrous Na<sub>2</sub>SO<sub>4</sub> and filtered. The filtrate was concentrated under reduced pressure to give the crude product, which was purified by column chromatographic separation (dichloromethane/ethyl acetate/petroleum ether: 10:20:30) to obtain the desired product.

#### 4. Optimization of the Reaction of 2-Phenylimidazo[1,2-*a*]pyridine with **2**<sup>a</sup>

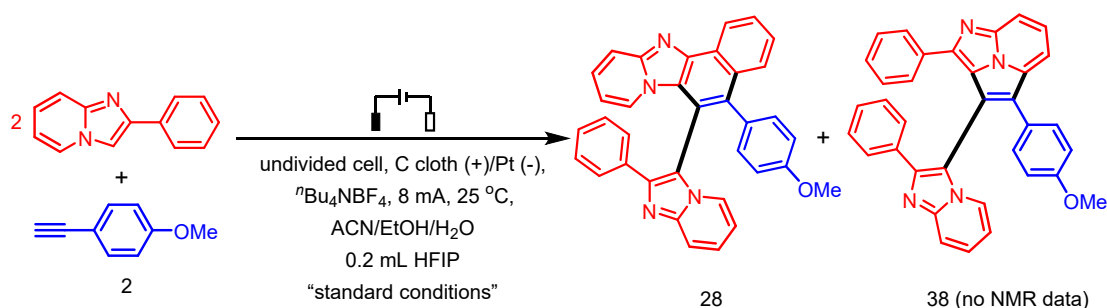

**Table S1** Optimization of the reaction of 2-phenylimidazo[1,2-*a*]pyridine with **2**<sup>a</sup>

| Entry          | Variation from "standard conditions"                                        | Yield <sup>b</sup> (%) |    |
|----------------|-----------------------------------------------------------------------------|------------------------|----|
|                |                                                                             | 28                     | 38 |
| 1              | none                                                                        | 42 <sup>c</sup>        | 18 |
| 2              | no HFIP                                                                     | 32                     | 15 |
| 3              | no H <sub>2</sub> O                                                         | trace                  | 35 |
| 4              | LiClO <sub>4</sub> instead of <sup>n</sup> Bu <sub>4</sub> NBF <sub>4</sub> | 34                     | 15 |
| 5              | 40 °C                                                                       | 20                     | 8  |
| 6 <sup>d</sup> | RVC as anode                                                                | 32                     | 12 |

<sup>a</sup>Reaction conditions: undivided cell, 2-phenylimidazo[1,2-*a*]pyridine (0.2 mmol, 38.8 mg), **2** (0.2 mmol, 26.4 mg), <sup>n</sup>Bu<sub>4</sub>NBF<sub>4</sub> (0.2 mmol, 65.8 mg), ACN/EtOH/H<sub>2</sub>O (8+1.2+1) mL, 0.2 mL HFIP, 8 mA, 25 °C, 1.5-2 h, under the open air, C cloth (35 × 15 mm), Pt (1.0 × 1.0 cm), C rod (∅ 6 mm), RVC (reticulated vitreous carbon, 1.0 × 1.0 cm), ACN: acetonitrile, EtOH: ethyl alcohol, HFIP: 1,1,1,3,3,3-hexafluoro-2-propanol. <sup>b</sup>Yields were determined by <sup>1</sup>H NMR using dibromomethane as the internal standard. <sup>c</sup>Isolated yield. <sup>d</sup>Reaction at 75 °C.

## 5、 Gram-Scale Synthesis of 3

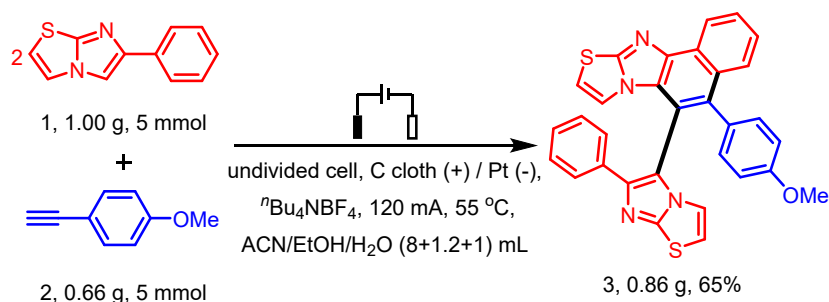

The 6-phenylimidazo[2,1-*b*]thiazole **1** (5 mmol, 1.00 g),  $t\text{Bu}_4\text{NBF}_4$  (3 mmol, 0.99 g), 1-ethynyl-4-methoxybenzene **2** (5 mmol, 0.66 g), ACN (120 mL) and EtOH (18 mL) and H<sub>2</sub>O (15 mL) was added in a 250 mL beaker, which was equipped with a stir bar, a carbon cloth (100 mm × 50 mm) anode and a platinum plate (20 mm × 20 mm × 0.1 mm) cathode. The solution was stirred and electrolyzed at a constant current of 120 mA for 5 h under the open air. The reaction solution was diluted with ethyl acetate (200 mL) and washed with brine (200 mL) and H<sub>2</sub>O (200 mL). The separated organic layer was dried over anhydrous Na<sub>2</sub>SO<sub>4</sub> and filtered. The filtrate was concentrated under reduced pressure to give the crude product, which was purified by column chromatographic separation (dichloromethane/ethyl acetate/petroleum ether: 10:20:30, 0.86 g, 65%).

## 6、 Unsuccessful substrates

### 6-1、 Unsuccessful substrates

Some other electron-deficient substituted alkynes or R<sub>2</sub> were substituted by electron-withdrawing group could not work well in the system and poor yields were achieved due to the incomplete conversion of the substrates (**S-1**, **S-5**). No desired product was observed with much starting material unconverted due to the decrease of alkyne activity when R<sub>1</sub> was substituted by 4-CN (**S-2**).

Table S2 The list of unsuccessful substrates.

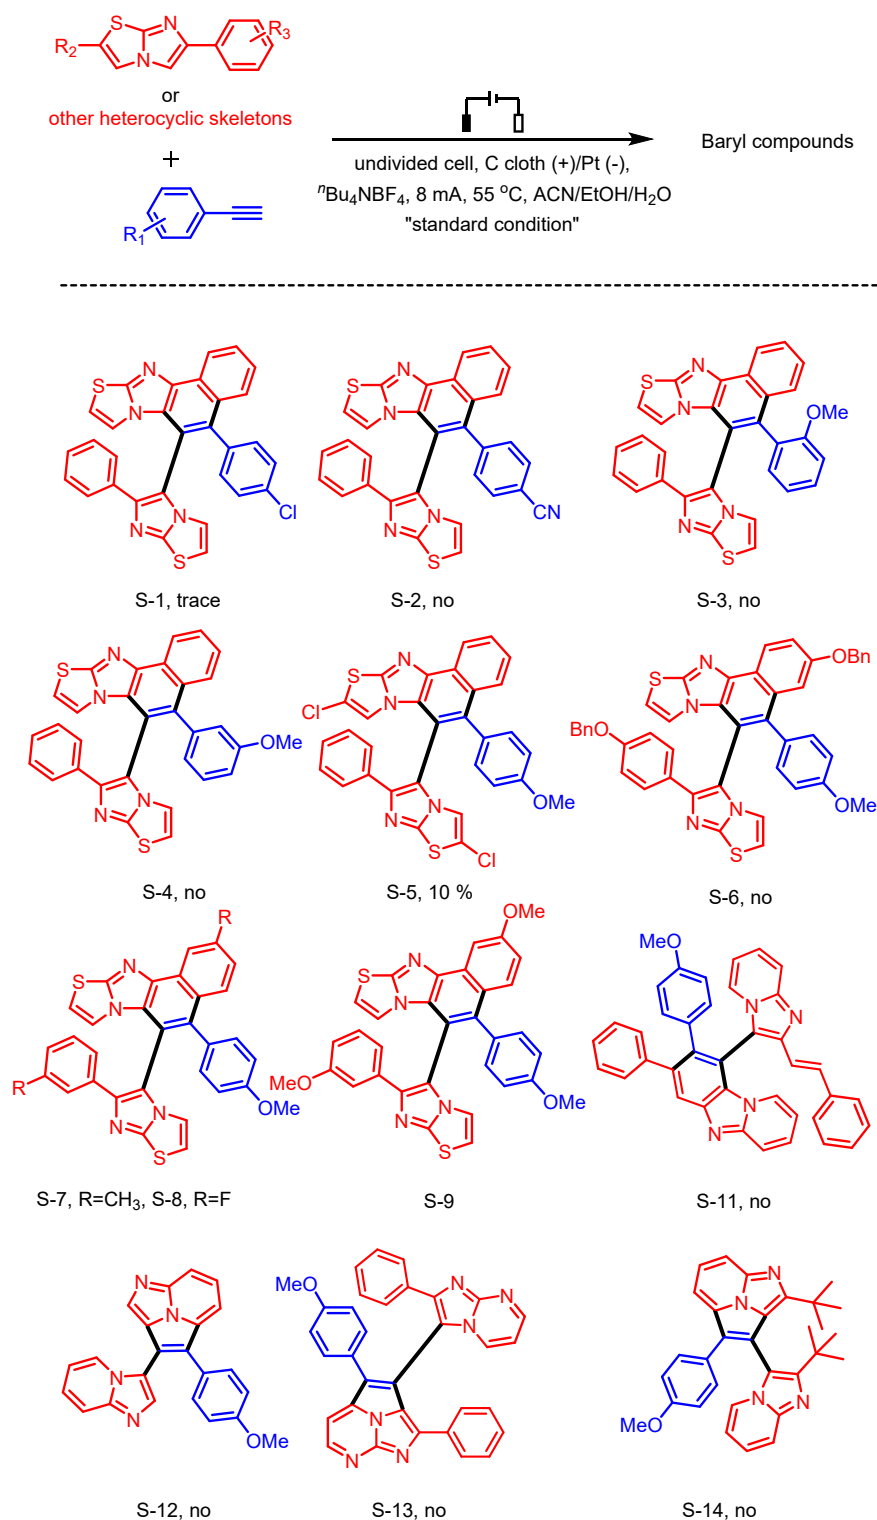

Reaction conditions: undivided cell, **1** (0.2 mmol), **2** (0.2 mmol), *t*Bu<sub>4</sub>NBF<sub>4</sub> (0.2 mmol, 65.8 mg), ACN/EtOH/H<sub>2</sub>O (8+1.2+1) mL, 8 mA, 55 °C, 1.5 h, under the open air, C cloth (35 × 15 mm), Pt (1.0 × 1.0 cm), isolated yield.

Due to the steric hindrance, only cyclization intermediates were produced when OMe replacing the *ortho* and *meta*-positions (**S-3**, **S-4**). When R<sub>3</sub> was replaced by 4-OBn, dimerization by-product was generated without any desired product detected (**S-6**). The reactions with both electron-donating groups (Me, OCH<sub>3</sub>) and electron-withdrawing group (F) on the *inter*-position of the benzene ring of 6-phenylimidazo[2,1-*b*]thiazoles afforded the desired products, however, they were difficult to separate and purify the product due to the positional isomerization (**S-7**, **S-8**, **S-9**).

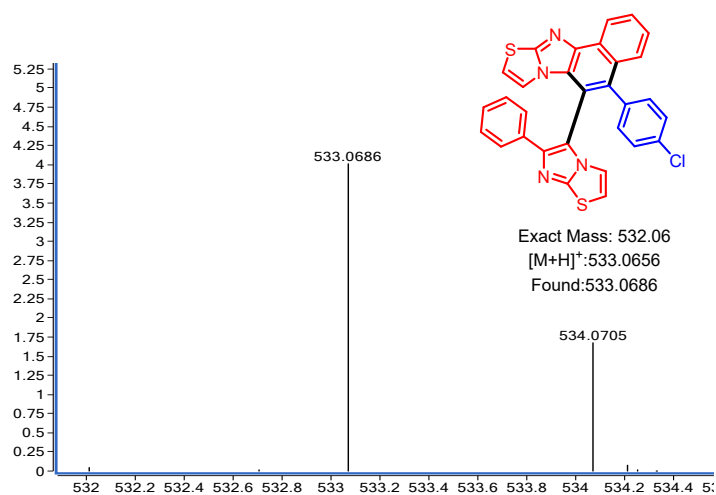

Figure S2: HRMS (ESI) analysis of **S-1**

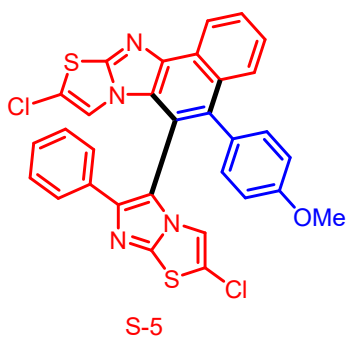

9-chloro-6-(2-chloro-6-phenylimidazo[2,1-*b*]thiazol-5-yl)-5-(4-methoxyphenyl)naphtho[1',2':4,5]imidazo[2,1-*b*]thiazole (**S-5**):

Yellow solid; Eluent: dichloromethane/ethyl acetate/petroleum ether: 10:20:30, 12.0 mg, 10 %;

$^1\text{H}$  NMR (400 MHz, Chloroform- $d$ )  $\delta$  8.78 (d,  $J = 8.2$  Hz, 1H), 7.84 (d,  $J = 8.5$  Hz, 1H), 7.77 (t,  $J = 7.6$  Hz, 1H), 7.62 - 7.51 (m, 3H), 7.28 - 7.21 (m, 1H), 7.21 - 7.06 (m, 3H), 6.91 (ddd,  $J = 16.3, 8.5, 2.5$  Hz, 2H), 6.79 (d,  $J = 10.6$  Hz, 2H), 6.63 (dd,  $J = 8.5, 2.8$  Hz, 1H), 3.77 (s, 3H); HRMS (ESI-TOF) Calcd for  $\text{C}_{31}\text{H}_{19}\text{Cl}_2\text{N}_4\text{OS}_2$   $[\text{M}+\text{H}]^+$ : 597.0372; found: 597.0364.

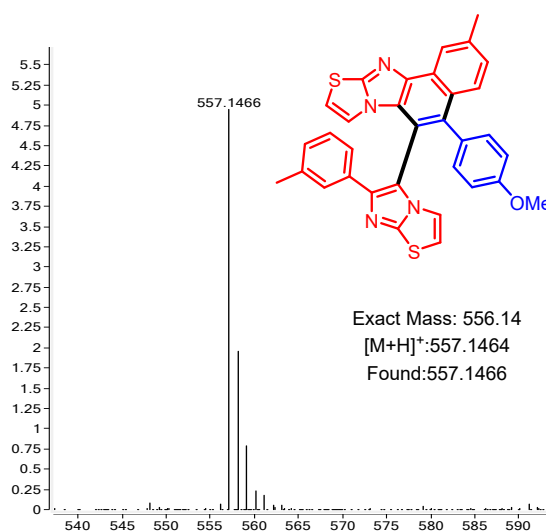

Figure S3: HRMS (ESI) analysis of S-7

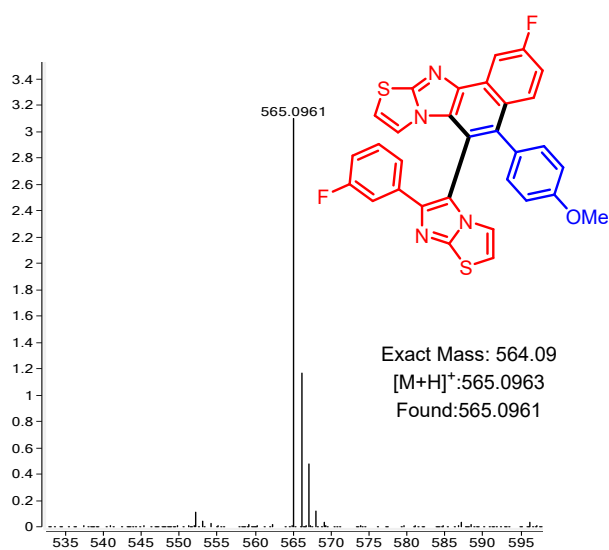

Figure S4: HRMS (ESI) analysis of S-8



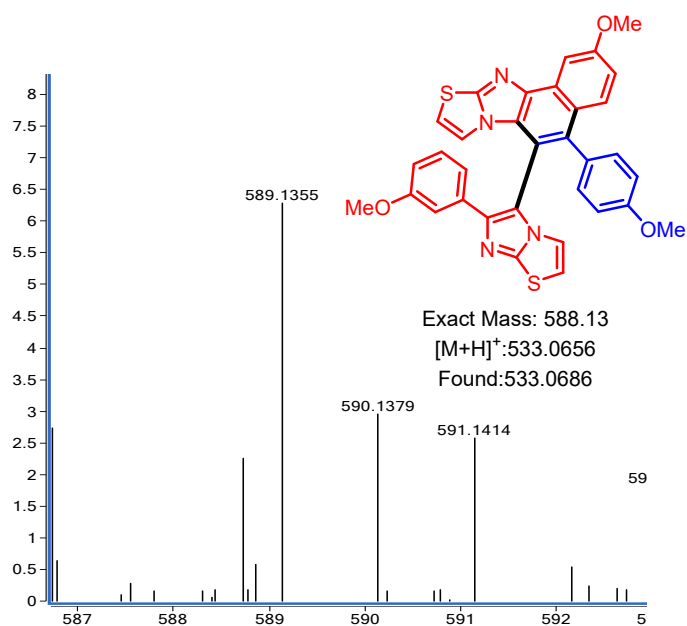

Figure S5: HRMS (ESI) analysis of S-9

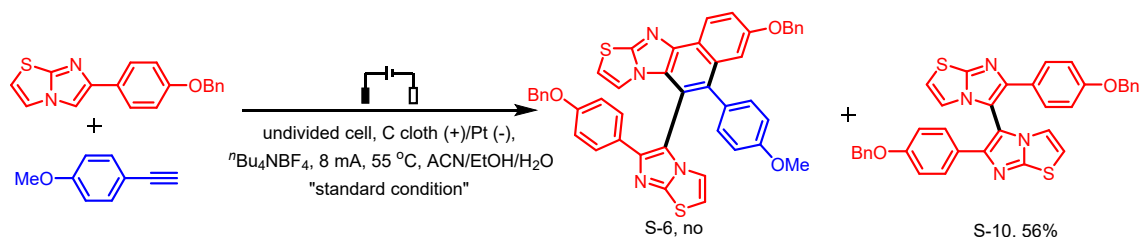

In an undivided cell equipped with a carbon cloth (35 mm x 15 mm) anode and a Pt (10 mm x 10 mm x 0.1 mm) cathode, 6-(4-(benzyloxy)phenyl)imidazo[2,1-*b*]thiazole (0.2 mmol, 61.3 mg), 1-ethynyl-4-methoxybenzene (0.2 mmol, 26.4 mg), <sup>t</sup>Bu<sub>4</sub>NBF<sub>4</sub> (0.2 mmol, 65.8 mg) were dissolved in a mixed solvent of ACN/EtOH/H<sub>2</sub>O (8+1.2+1) mL. The mixture above was stirred and electrolyzed at a constant current of 8 mA for 1.5 h under the open air. The reaction solution was diluted with ethyl acetate (50 mL) and washed with H<sub>2</sub>O (50 mL). The separated organic layer was dried over anhydrous Na<sub>2</sub>SO<sub>4</sub> and filtered. The filtrate was concentrated under reduced pressure to give the

crude product, which was purified by column chromatographic separation to obtain the **S-10** (ethyl acetate/petroleum ether: 1:15, 34.20 mg, 56 %).

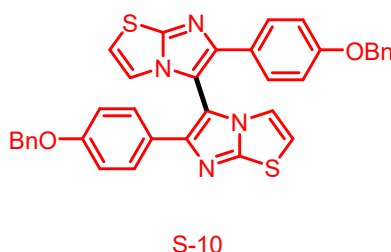

6,6'-bis(4-(benzyloxy)phenyl)-5,5'-biimidazo[2,1-*b*]thiazole (**S-10**):

Yellow solid; Eluent: ethyl acetate/petroleum ether: 1:15; 34.20 mg; 56 %;

$^1\text{H}$  NMR (400 MHz,  $\text{DMSO-}d_6$ )  $\delta$  7.90 - 7.84 (m, 6H), 7.49 - 7.44 (m, 4H), 7.44 - 7.37 (m, 6H), 7.37 - 7.30 (m, 2H), 7.16 - 7.08 (m, 4H), 5.15 (s, 4H).

## 6-2、 Different substituted 6-phenylimidazo[2,1-*b*]thiazoles were added at the same time

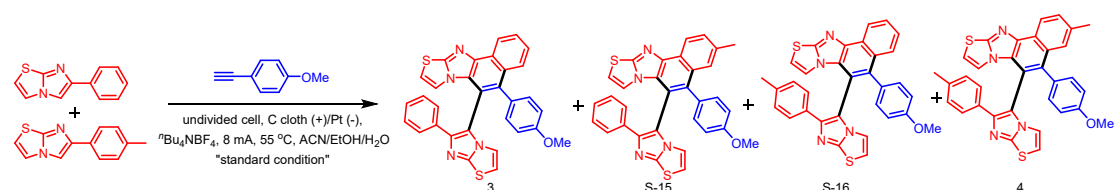

In an undivided cell equipped with a carbon cloth (35 mm x 15 mm) anode and a Pt (10 mm x 10 mm x 0.1 mm) cathode, 6-phenylimidazo[2,1-*b*]thiazole (0.2 mmol, 40.0 mg), 6-(*p*-tolyl)imidazo[2,1-*b*]thiazole (0.2 mmol, 42.9 mg), 1-ethynyl-4-methoxybenzene **2** (0.4 mmol, 52.8 mg),  $n\text{Bu}_4\text{NBF}_4$  (0.2 mmol, 65.8 mg) were dissolved in a mixed solvent of ACN/EtOH/ $\text{H}_2\text{O}$  (8+1.2+1) mL. The mixture above was stirred and electrolyzed at a constant current of 8 mA for 1.5 h under the open air. The reaction solution was detected by HPLC-MS.

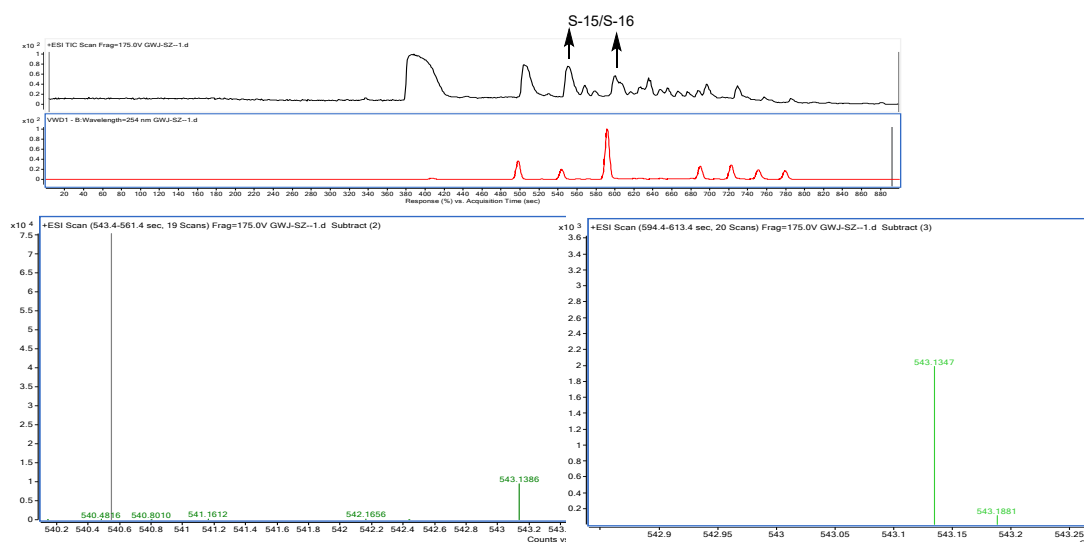

Figure S6. HPLC-MS of different substituted 6-phenylimidazo[2,1-*b*]thiazoles

### 6-3、6-Phenylimidazo[2,1-*b*]thiazole and 2-phenylimidazo[1,2-*a*]pyridine were added at the same time

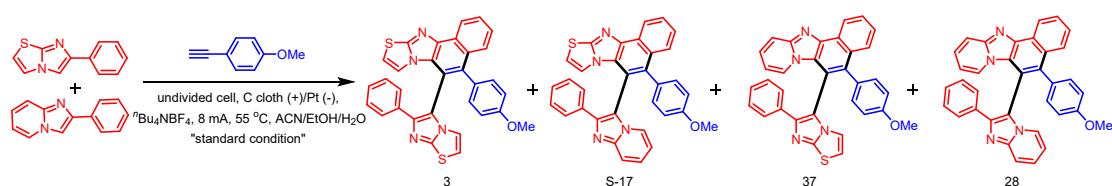

In an undivided cell equipped with a carbon cloth (35 mm x 15 mm) anode and a Pt (10 mm x 10 mm x 0.1 mm) cathode, 6-phenylimidazo[2,1-*b*]thiazole (0.2 mmol, 40.0 mg), 2-phenylimidazo[1,2-*a*]pyridine (0.2 mmol, 38.8 mg), 1-ethynyl-4-methoxybenzene **2** (0.4 mmol, 52.8 mg), *n*Bu<sub>4</sub>NBF<sub>4</sub> (0.2 mmol, 65.8 mg) were dissolved in a mixed solvent of ACN/EtOH/H<sub>2</sub>O (8+1.2+1) mL. The mixture above was stirred and electrolyzed at a constant current of 8 mA for 1.5 h under the open air. The reaction solution was detected by HPLC-MS. **37** was detected by NMR.

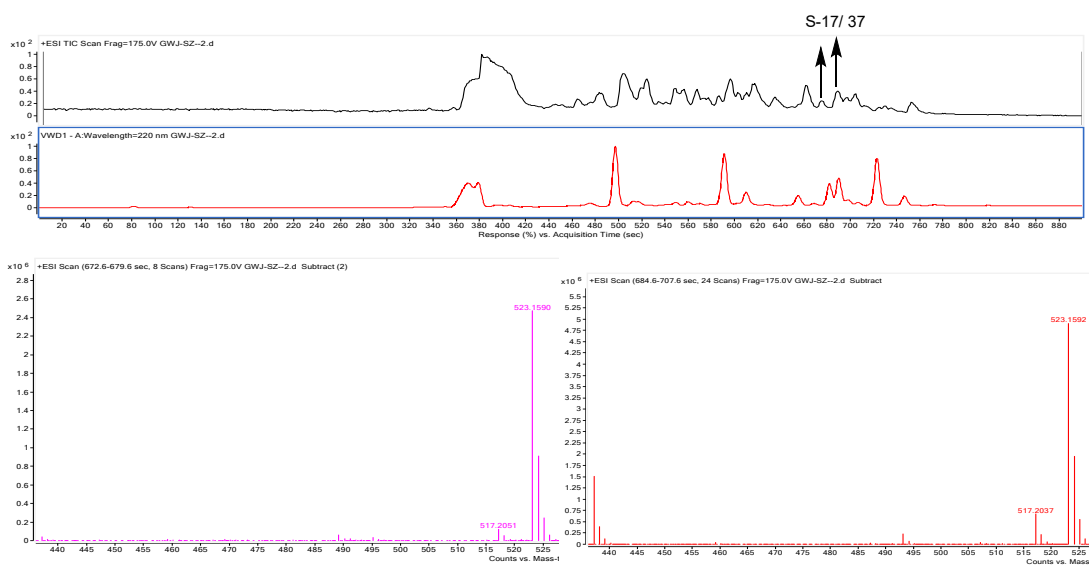

Figure S7. HPLC-MS of 6-phenylimidazo[2,1-*b*]thiazole and 2-phenylimidazo[1,2-

*a*]pyridine

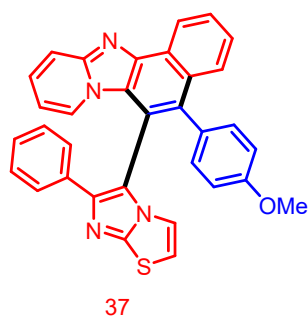

5-(5-(4-methoxyphenyl)naphtho[1',2':4,5]imidazo[1,2-*a*]pyridin-6-yl)-6-phenylimidazo[2,1-*b*]thiazole (**37**):

Pale yellow solid; Eluent: dichloromethane/ethyl acetate/petroleum ether 10:20:30; <10%;

$^1\text{H}$  NMR (400 MHz, Chloroform-*d*)  $\delta$  9.03 (d,  $J = 6.9$  Hz, 1H), 7.85 (d,  $J = 9.2$  Hz, 1H), 7.79 (dd,  $J = 16.7, 8.5$  Hz, 2H), 7.66 (d,  $J = 8.3$  Hz, 1H), 7.60 - 7.50 (m, 3H), 7.34 - 7.28 (m, 1H), 7.14 - 7.08 (m, 3H), 7.06 (dd,  $J = 8.4, 2.3$  Hz, 1H), 6.86 (dd,  $J = 8.4, 2.3$  Hz, 1H), 6.83 (d,  $J = 4.5$  Hz, 1H), 6.74 (dd,  $J = 8.4, 2.8$  Hz, 1H), 6.65 (d,  $J = 4.5$  Hz, 1H), 6.60 - 6.53 (m, 2H), 3.72 (s, 3H);  $^{13}\text{C}$  NMR (101 MHz, Chloroform-*d*)  $\delta$  158.86, 149.32, 148.28, 145.55, 141.64, 136.95, 133.99, 131.86, 131.24, 130.79, 129.65, 128.67, 128.15, 127.95, 127.58, 127.50, 127.48, 126.61, 125.92, 125.66,

123.25, 122.59, 117.96, 117.24, 116.62, 114.20, 113.50, 113.22, 112.90, 112.12, 55.24; HRMS (ESI-TOF) Calcd for C<sub>33</sub>H<sub>23</sub>N<sub>4</sub>OS [M+H]<sup>+</sup>: 523.1587; found: 523.1594.

#### 6-4、 HPLC spectrum of 4

In an undivided cell equipped with a carbon cloth (35 mm x 15 mm) anode and a Pt (10 mm x 10 mm x 0.1 mm) cathode, 6-(p-tolyl)imidazo[2,1-b]thiazole (0.2 mmol), 1-ethynyl-4-methoxybenzene (0.2 mmol), <sup>n</sup>Bu<sub>4</sub>NBF<sub>4</sub> (0.2 mmol, 65.8 mg) were dissolved in a mixed solvent of ACN/EtOH/H<sub>2</sub>O (8+1.2+1) mL. The mixture above was stirred and electrolyzed at a constant current of 8 mA for 1.5 h under the open air. The reaction solution was diluted with ethyl acetate (50 mL) and washed with H<sub>2</sub>O (50 mL). The separated organic layer was dried over anhydrous Na<sub>2</sub>SO<sub>4</sub> and filtered. The filtrate was concentrated under reduced pressure to give the crude product, which was purified by column chromatographic separation (dichloromethane/ethyl acetate/petroleum ether: 10:20:30) to obtain the desired product **4**.

HPLC analysis: Daicel Chiralpak AS-H, hexane/iso-propanol = 90:10, flow rate = 0.3 mL/min, λ = 245nm.

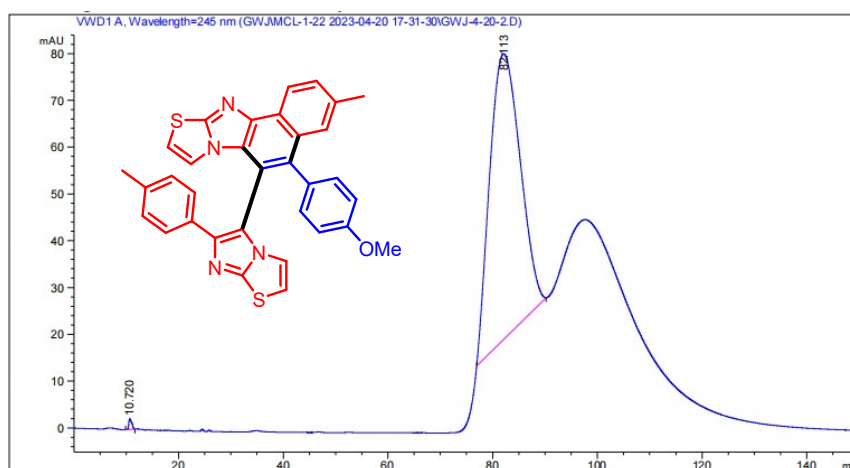

Figure S8. HPLC spectrum of **4**

## 7、 Mechanistic Studies

### 7-1、 Radical-trapping experiments

#### 7-1-1、 BHT was added

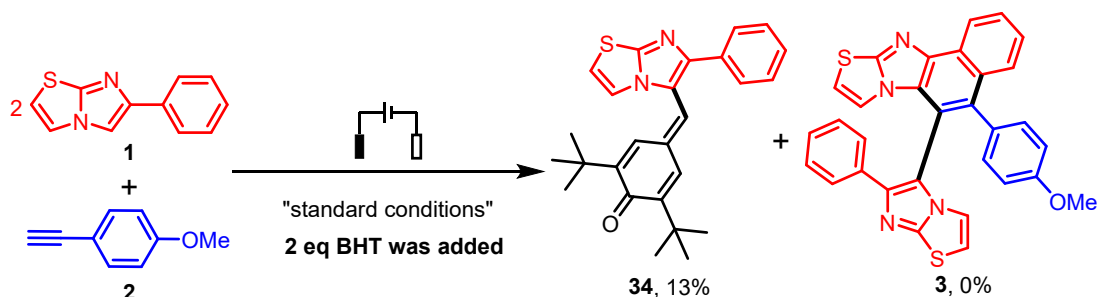

In an undivided cell equipped with a carbon cloth (35 mm x 15 mm) anode and a Pt (10 mm x 10 mm x 0.1 mm) cathode, 6-phenylimidazo[2,1-*b*]thiazole **1** (0.2 mmol, 40.0 mg), 1-ethynyl-4-methoxybenzene **2** (0.2 mmol, 26.4 mg),  $n\text{Bu}_4\text{NBF}_4$  (0.2 mmol, 65.8 mg) and BHT (0.4 mmol, 88.2 mg) were dissolved in a mixed solvent of ACN/EtOH/H<sub>2</sub>O (8+1.2+1) mL. The mixture above was stirred and electrolyzed at a constant current of 8 mA for 3 h under the open air. No desired product was detected. Moreover, the corresponding radical trapping product **34** was generated.

The reaction solution was diluted with ethyl acetate (50 mL) and washed with brine (50 mL) and H<sub>2</sub>O (50 mL). The separated organic layer was dried over anhydrous Na<sub>2</sub>SO<sub>4</sub> and filtered. The filtrate was concentrated under reduced pressure to give the crude product, which was purified by column chromatographic separation (dichloromethane/ethyl acetate/petroleum ether: 10:2:30) to obtain the radical trapping product **34** (10.8 mg, 13%).

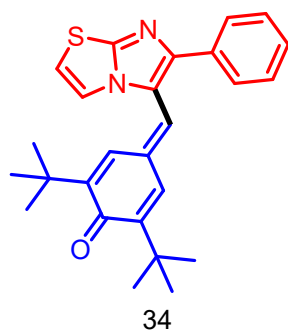

2,6-di-*tert*-butyl-4-((6-phenylimidazo[2,1-*b*]thiazol-5-yl)methylene)cyclohexa-2,5-dien-1-one (**34**):

Orange solid; Eluent: dichloromethane/ethyl acetate/petroleum ether 10:2:30; 10.8 mg, 13%;

$^1\text{H}$  NMR (400 MHz,  $\text{DMSO-}d_6$ )  $\delta$  8.09 (d,  $J = 4.5$  Hz, 1H), 7.68 - 7.61 (m, 3H), 7.47 (d,  $J = 4.4$  Hz, 1H), 7.39 (t,  $J = 7.4$  Hz, 2H), 7.31 (t,  $J = 7.3$  Hz, 1H), 7.26 (d,  $J = 2.4$  Hz, 1H), 6.92 (d,  $J = 2.3$  Hz, 1H), 1.28 (s, 9H), 0.87 (s, 9H); HRMS (ESI-TOF) Calcd for  $\text{C}_{26}\text{H}_{29}\text{N}_2\text{OS}$   $[\text{M}+\text{H}]^+$ : 417.1995; found: 417.1991.

### 7-1-2、 TEMPO was added

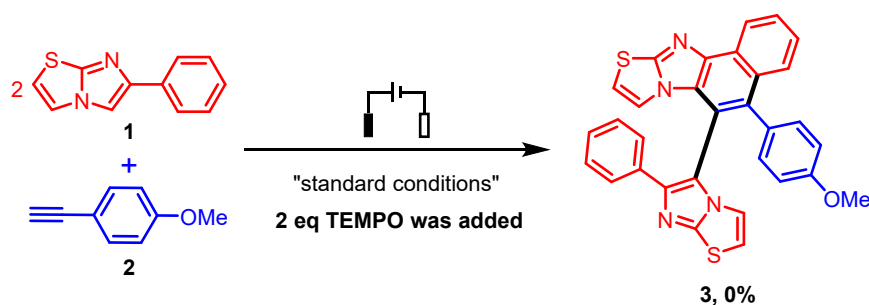

In an undivided cell equipped with a carbon cloth (35 mm x 15 mm) anode and a Pt (10 mm x 10 mm x 0.1 mm) cathode, 6-phenylimidazo[2,1-*b*]thiazole **1** (0.2 mmol, 40.0 mg), 1-ethynyl-4-methoxybenzene **2** (0.2 mmol, 26.4 mg),  $n\text{Bu}_4\text{NBF}_4$  (0.2 mmol, 65.8 mg) and TEMPO (0.4 mmol, 62.5 mg) were dissolved in a mixed solvent of ACN/EtOH/ $\text{H}_2\text{O}$  (8+1.2+1) mL. The mixture above was stirred and electrolyzed at a constant current of 8 mA for 1.5 h under the open air. No desired product was detected.

### 7-2、 Isotope labeling experiments:

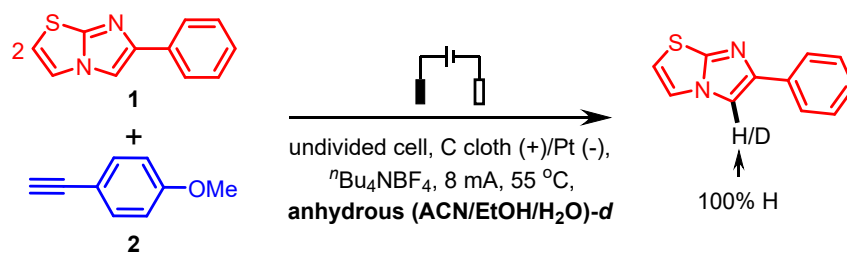

In an undivided cell equipped with a carbon cloth (35 mm x 15 mm) anode and a Pt (10 mm x 10 mm x 0.1 mm) cathode, 6-phenylimidazo[2,1-*b*]thiazole **1** (0.2 mmol,

40.0 mg), 1-ethynyl-4-methoxybenzene **2** (0.2 mmol, 26.4 mg),  $n\text{Bu}_4\text{NBF}_4$  (0.2 mmol, 65.8 mg) were dissolved in a mixed solvent of (ACN/EtOH/ $\text{H}_2\text{O}$ )- $d_6$  (8+1.2+1) mL. The mixture above was stirred and electrolyzed at a constant current of 8 mA for 40 min under the  $\text{N}_2$  atmosphere. No H/D change was detected.

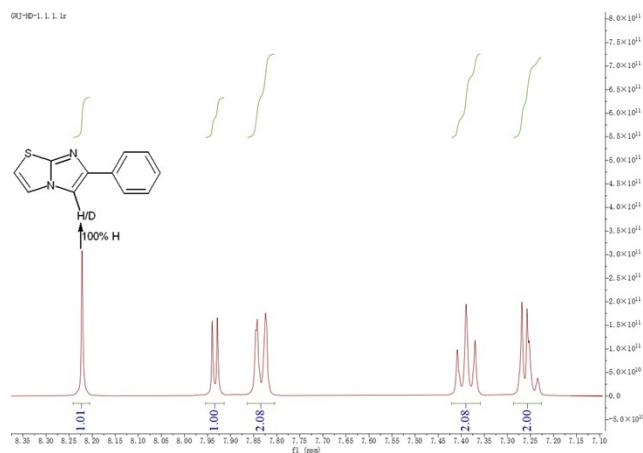

**Figure S9**  $^1\text{H}$  NMR data of H/D exchange experiments of substrates **1** and **2** under mixed solvents of (ACN/EtOH/ $\text{H}_2\text{O}$ )- $d_6$

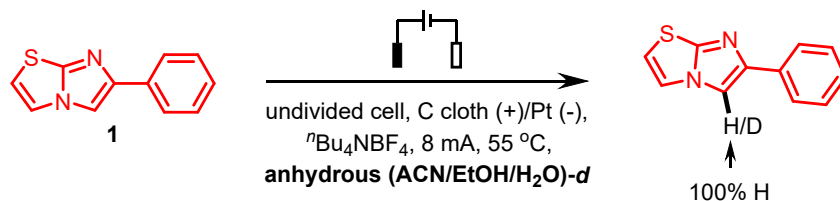

In an undivided cell equipped with a carbon cloth (35 mm x 15 mm) anode and a Pt (10 mm x 10 mm x 0.1 mm) cathode, 6-phenylimidazo[2,1-*b*]thiazole **1** (0.2 mmol, 40.0 mg),  $n\text{Bu}_4\text{NBF}_4$  (0.2 mmol, 65.8 mg) were dissolved in a mixed solvent of (ACN/EtOH/ $\text{H}_2\text{O}$ )- $d_6$  (8+1.2+1) mL. The mixture above was stirred and electrolyzed at a constant current of 8 mA for 40 min under the  $\text{N}_2$  atmosphere. No H/D change was detected.

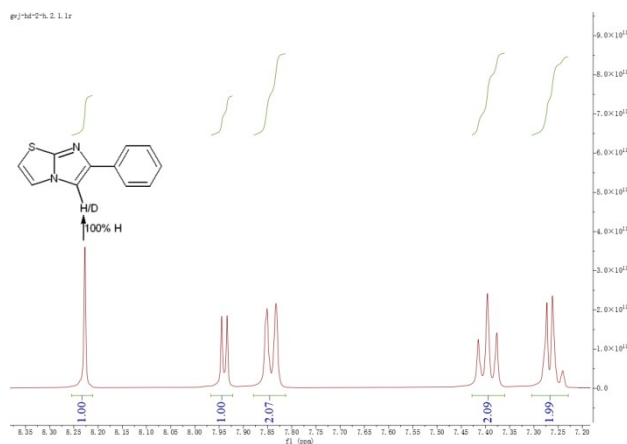





the reaction solution was taken every 15 minutes, and the yields were determined by  $^1\text{H}$  NMR using dibromomethane as the internal standard. Taking time as abscissa and yield as ordinate, the image was drawn and  $K_{\text{H}}$  was obtained.

In an undivided cell equipped with a carbon cloth (35 mm x 15 mm) anode and a Pt (10 mm x 10 mm x 0.1 mm) cathode, 6-phenylimidazo[2,1-*b*]thiazole-5-*d* (0.2 mmol), 1-ethynyl-4-methoxybenzene 2 (0.2 mmol, 26.4 mg),  $n\text{Bu}_4\text{NBF}_4$  (0.2 mmol, 65.8 mg) were dissolved in a mixed solvent of ACN/EtOH/H<sub>2</sub>O (8+1.2+1) mL. 0.2 ml of the reaction solution was taken every 15 minutes, and the yields were determined by  $^1\text{H}$  NMR using dibromomethane as the internal standard. Taking time as abscissa and yield as ordinate, the image was drawn and  $K_{\text{D}}$  was obtained.

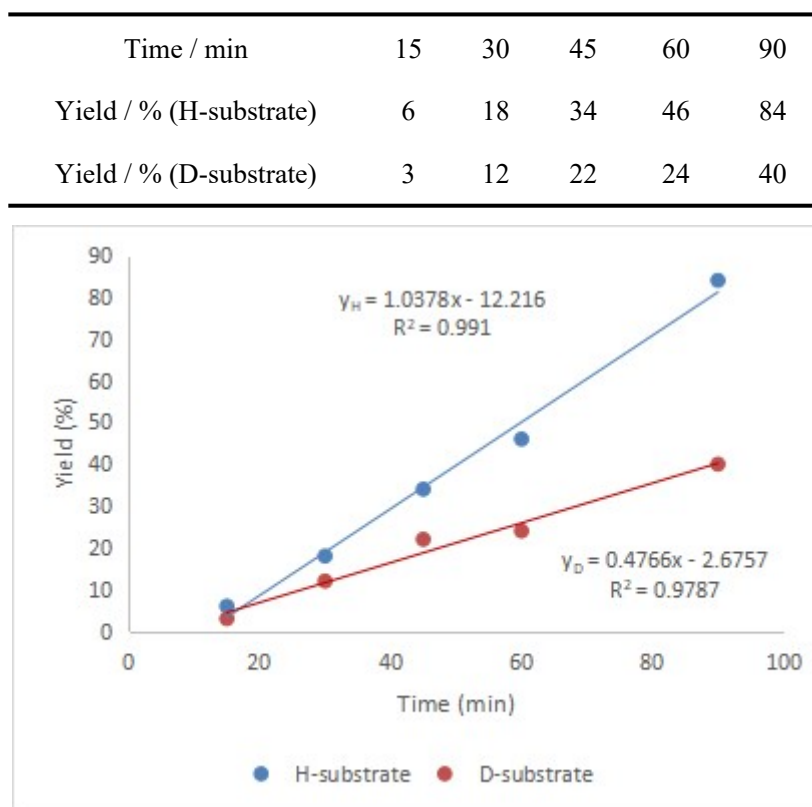

**Figure S11.** Kinetic isotope effect

## 7-4、Verification experiments of intermediates

### 7-4-1、Synthesis of substrates 35 and 36

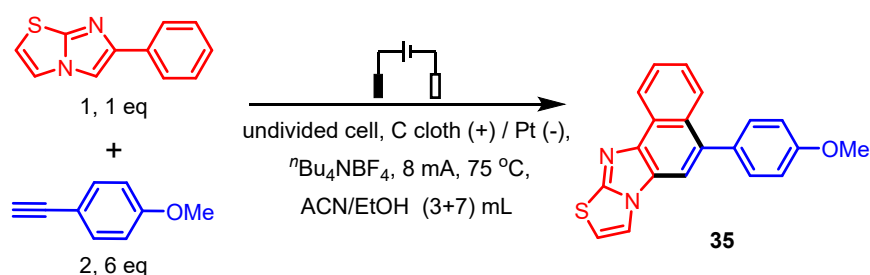

In an undivided cell equipped with a carbon cloth (35 mm x 15 mm) anode and a Pt (10 mm x 10 mm x 0.1 mm) cathode, 6-phenylimidazo[2,1-*b*]thiazole (0.2 mmol, 40.0 mg), 1-ethynyl-4-methoxybenzene (1.2 mmol, 158.6 mg),  $n\text{Bu}_4\text{NBF}_4$  (0.2 mmol, 65.8 mg) were dissolved in 3 mL ACN and 7 mL EtOH. The mixture above was stirred and electrolyzed at a constant current of 8 mA for 2 h under the open air. The reaction solution was diluted with ethyl acetate (50 mL) and washed with  $\text{H}_2\text{O}$  (50 mL). The separated organic layer was dried over anhydrous  $\text{Na}_2\text{SO}_4$  and filtered. The filtrate was concentrated under reduced pressure to give the crude product, which was purified by column chromatographic separation (petroleum ether/ethyl acetate: 15:1) to obtain the desired product **35**.

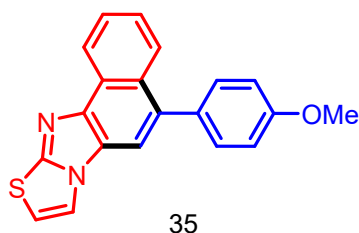

5-(4-methoxyphenyl)naphtho[1',2':4,5]imidazo[2,1-*b*]thiazole (**35**):<sup>[1]</sup>

Pale yellow solid; Eluent: petroleum ether/ethyl acetate 15:1; 59.5 mg, 90%;

$^1\text{H}$  NMR (400 MHz, Chloroform-*d*)  $\delta$  8.75 (d,  $J = 9.6$  Hz, 1H), 7.97 (d,  $J = 8.4$  Hz, 1H), 7.69 - 7.62 (m, 3H), 7.51 - 7.40 (m, 3H), 7.07 - 7.00 (m, 2H), 6.85 (d,  $J = 4.5$  Hz, 1H), 3.90 (s, 3H);  $^{13}\text{C}$  NMR (101 MHz, Chloroform-*d*)  $\delta$  159.07, 154.24, 143.39, 134.39, 133.38, 131.50, 129.65, 127.04, 126.85, 126.51, 125.16, 122.52, 117.44, 113.84, 111.74, 111.43, 55.48; HRMS (ESI-TOF) Calcd for  $\text{C}_{20}\text{H}_{15}\text{N}_2\text{OS}$   $[\text{M}+\text{H}]^+$ : 331.09; found: 331.0896.

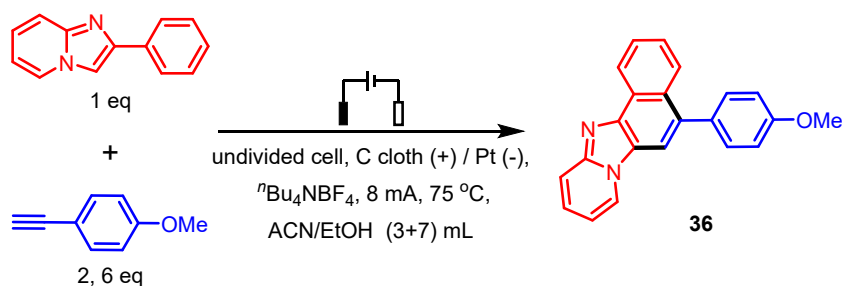

In an undivided cell equipped with a carbon cloth (35 mm x 15 mm) anode and a Pt (10 mm x 10 mm x 0.1 mm) cathode, 2-phenylimidazo[1,2-*a*]pyridine (0.2 mmol, 38.9 mg), 1-ethynyl-4-methoxybenzene **2** (1.2 mmol, 158.6 mg),  $t\text{Bu}_4\text{NBF}_4$  (0.2 mmol, 65.8 mg) were dissolved in 3 mL ACN and 7 mL EtOH. The mixture above was stirred and electrolyzed at a constant current of 8 mA for 1.5 h under the open air. The reaction solution was diluted with ethyl acetate (50 mL) and washed with H<sub>2</sub>O (50 mL). The separated organic layer was dried over anhydrous Na<sub>2</sub>SO<sub>4</sub> and filtered. The filtrate was concentrated under reduced pressure to give the crude product, which was purified by column chromatographic separation (petroleum ether/ethyl acetate: 20:1) to obtain the desired product **36**.

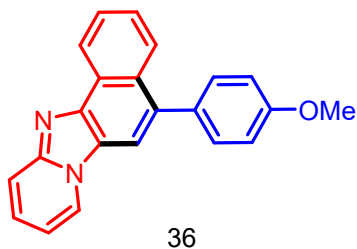

5-(4-methoxyphenyl)naphtho[1',2':4,5]imidazo[1,2-*a*]pyridine (**36**):<sup>[1]</sup>

Pale yellow solid; Eluent: petroleum ether/ethyl acetate 20:1; 20.8 mg, 8%;

<sup>1</sup>H NMR (400 MHz, Chloroform-*d*)  $\delta$  8.94 (d,  $J$  = 8.1 Hz, 1H), 8.51 (d,  $J$  = 6.8 Hz, 1H), 8.02 (d,  $J$  = 8.5 Hz, 1H), 7.93 (d,  $J$  = 9.2 Hz, 1H), 7.84 (s, 1H), 7.76 - 7.70 (m, 1H), 7.56 (t,  $J$  = 7.7 Hz, 1H), 7.48 (dd,  $J$  = 9.0, 2.8 Hz, 3H), 7.16 - 7.03 (m, 2H), 6.98 (t,  $J$  = 6.7 Hz, 1H), 3.92 (s, 3H); <sup>13</sup>C NMR (101 MHz, Chloroform-*d*)  $\delta$  159.20, 146.86, 135.35, 133.30, 132.16, 131.53, 131.17, 130.11, 128.34, 127.97, 126.54, 126.32, 124.59, 123.86, 123.50, 117.75, 113.93, 111.95, 110.87, 55.54; HRMS (ESI-TOF) Calcd for C<sub>22</sub>H<sub>17</sub>N<sub>2</sub>O [M+H]<sup>+</sup>: 325.1335; found: 325.1334.

#### 7-4-2、Verification experiments of intermediate 35

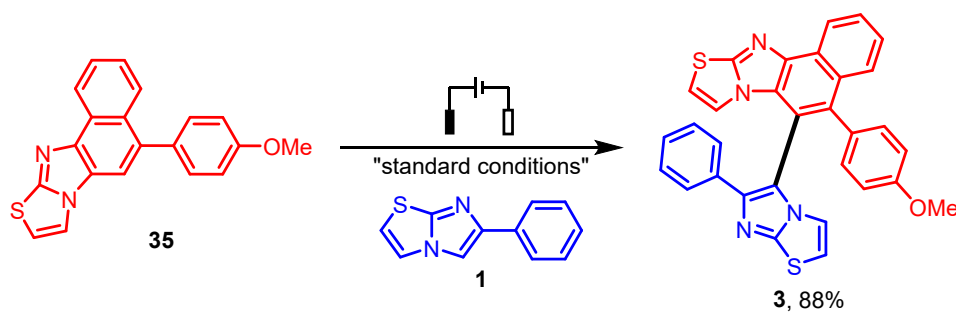

In an undivided cell equipped with a carbon cloth (35 mm x 15 mm) anode and a Pt (10 mm x 10 mm x 0.1 mm) cathode, 5-(4-methoxyphenyl)naphtho[1',2':4,5]imidazo[2,1-*b*]thiazole **35** (0.2 mmol, 66.1 mg), 6-phenylimidazo[2,1-*b*]thiazole **1** (0.2 mmol, 40.0 mg),  $n\text{Bu}_4\text{NBF}_4$  (0.2 mmol, 65.8 mg) were dissolved in a mixed solvent of ACN/EtOH/H<sub>2</sub>O (8+1.2+1) mL. The mixture above was stirred and electrolyzed at a constant current of 8 mA for 1.5 h under the open air. The reaction solution was diluted with ethyl acetate (50 mL) and washed with H<sub>2</sub>O (50 mL). The separated organic layer was dried over anhydrous Na<sub>2</sub>SO<sub>4</sub> and filtered. The filtrate was concentrated under reduced pressure to give the crude product, which was purified by column chromatographic separation (dichloromethane/ethyl acetate/petroleum ether: 10:20:30) to obtain the desired product **3** (93.1 mg, 88%).

#### 7-4-3、Verification experiments of intermediate 36

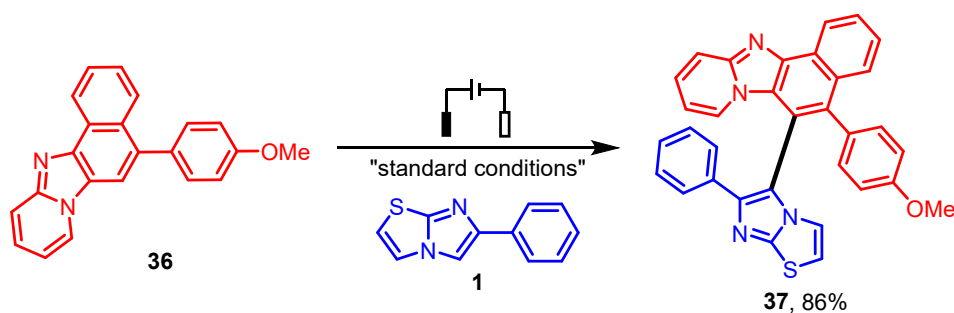

In an undivided cell equipped with a carbon cloth (35 mm x 15 mm) anode and a Pt (10 mm x 10 mm x 0.1 mm) cathode, 5-(4-

methoxyphenyl)naphtho[1',2':4,5]imidazo[1,2-*a*]pyridine **36** (0.2 mmol, 64.9 mg), 6-phenylimidazo[2,1-*b*]thiazole **1** (0.2 mmol, 40.0 mg), <sup>n</sup>Bu<sub>4</sub>NBF<sub>4</sub> (0.2 mmol, 65.8 mg) were dissolved in a mixed solvent of ACN/EtOH/H<sub>2</sub>O (8+1.2+1) mL. The mixture above was stirred and electrolyzed at a constant current of 8 mA for 1.5 h under the open air. The reaction solution was diluted with ethyl acetate (50 mL) and washed with H<sub>2</sub>O (50 mL). The separated organic layer was dried over anhydrous Na<sub>2</sub>SO<sub>4</sub> and filtered. The filtrate was concentrated under reduced pressure to give the crude product, which was purified by column chromatographic separation (dichloromethane/ethyl acetate/petroleum ether: 10:20:30) to obtain the desired product **37** (89.9 mg, 86%).

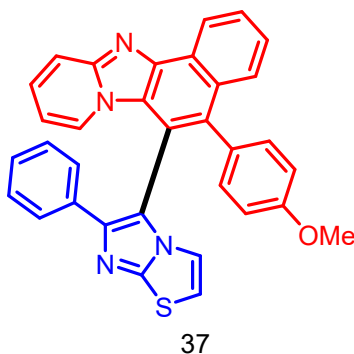

5-(5-(4-methoxyphenyl)naphtho[1',2':4,5]imidazo[1,2-*a*]pyridin-6-yl)-6-phenylimidazo[2,1-*b*]thiazole (**37**):

Pale yellow solid; Eluent: dichloromethane/ethyl acetate/petroleum ether 10:20:30; 89.9 mg, 86%;

<sup>1</sup>H NMR (400 MHz, Chloroform-*d*) δ 9.03 (d, *J* = 6.9 Hz, 1H), 7.85 (d, *J* = 9.2 Hz, 1H), 7.79 (dd, *J* = 16.7, 8.5 Hz, 2H), 7.66 (d, *J* = 8.3 Hz, 1H), 7.60 - 7.50 (m, 3H), 7.34 - 7.28 (m, 1H), 7.14 - 7.08 (m, 3H), 7.06 (dd, *J* = 8.4, 2.3 Hz, 1H), 6.86 (dd, *J* = 8.4, 2.3 Hz, 1H), 6.83 (d, *J* = 4.5 Hz, 1H), 6.74 (dd, *J* = 8.4, 2.8 Hz, 1H), 6.65 (d, *J* = 4.5 Hz, 1H), 6.60 - 6.53 (m, 2H), 3.72 (s, 3H); <sup>13</sup>C NMR (101 MHz, Chloroform-*d*) δ 158.86, 149.32, 148.28, 145.55, 141.64, 136.95, 133.99, 131.86, 131.24, 130.79, 129.65, 128.67, 128.15, 127.95, 127.58, 127.50, 127.48, 126.61, 125.92, 125.66, 123.25, 122.59, 117.96, 117.24, 116.62, 114.20, 113.50, 113.22, 112.90, 112.12, 55.24; HRMS (ESI-TOF) Calcd for C<sub>33</sub>H<sub>23</sub>N<sub>4</sub>OS [M+H]<sup>+</sup>: 523.1587; found: 523.1594.

## 7-5、Cyclic voltammetry experiments

The undivided cell was equipped with glassy-carbon disk working electrode (diameter, 3.0 mm) and Pt wire auxiliary electrode. The Ag/AgCl was used as reference electrode. The scan range was 0.0 V to 3 V. The scan rate was 100 mVs<sup>-1</sup>. ACN (8 mL) and EtOH (1.2 mL) and H<sub>2</sub>O (1 mL) containing <sup>n</sup>Bu<sub>4</sub>NBF<sub>4</sub> (0.2 mmol, 65.8 mg) was poured into the electrochemical cell in all experiments.

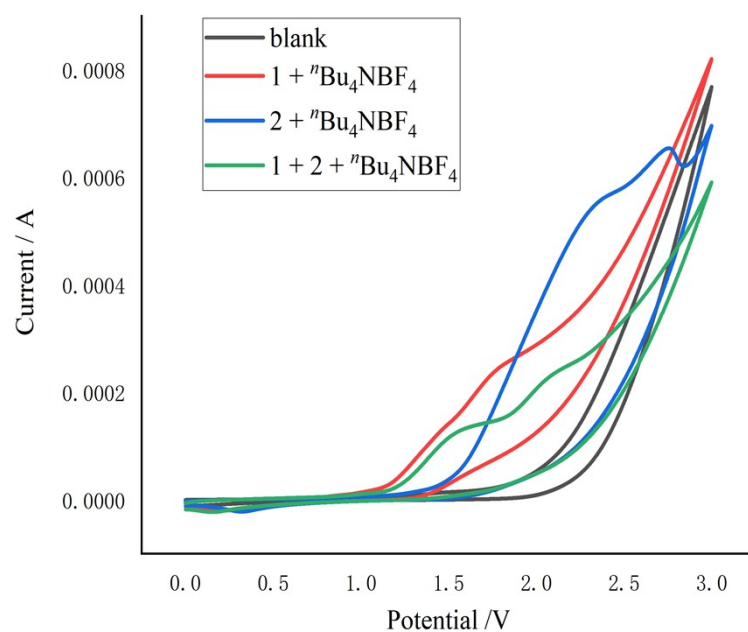

**Figure S12** Cyclic voltammetry experiments of substrates

100 mVs<sup>-1</sup>: (black) blank; (red) 6-phenylimidazo[2,1-*b*]thiazole **1** (0.2 mmol, 40.0 mg); (blue) 1-ethynyl-4-methoxybenzene **2** (0.2 mmol, 26.4 mg); (green) 6-phenylimidazo[2,1-*b*]thiazole **1** (0.2 mmol, 40.0 mg) and 1-ethynyl-4-methoxybenzene **2** (0.2 mmol, 26.4 mg).

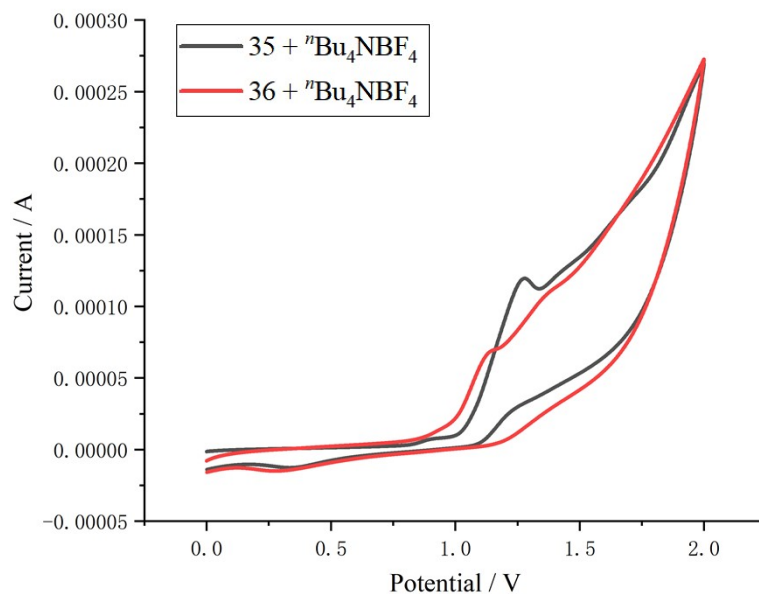

**Figure S13** Cyclic voltammery experiments of intermediates **35** and **36**

100 mVs-1: (black) 5-(4-methoxyphenyl)naphtho[1',2':4,5]imidazo[2,1-*b*]thiazole **35** (0.2 mmol, 66.1 mg); (red) 5-(4-methoxyphenyl)naphtho[1',2':4,5]imidazo[1,2-*a*]pyridine **36** (0.2 mmol, 64.9 mg).

## 8、X-ray Crystallography Studies of Product **3**

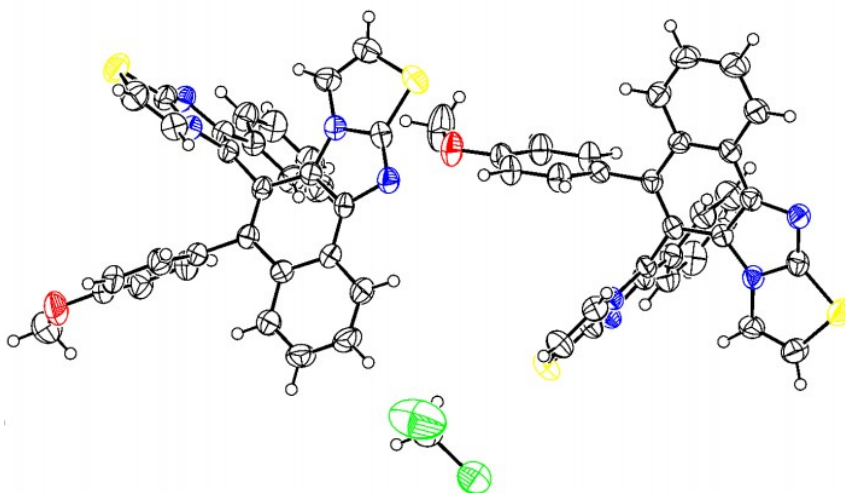

Single crystal suitable for X-ray diffraction was obtained by slow evaporation of a saturated solution of compound **3** (cyclohexane/ $\text{CH}_2\text{Cl}_2$ ) in a loosely capped vial.

**Figure S14** Structure of **3** by X-Ray crystallographic (CCDC = 2182532 )

**Table S3** Crystal data and structure refinement for **3**

|                   |                                                                       |
|-------------------|-----------------------------------------------------------------------|
| Empirical formula | $\text{C}_{63}\text{H}_{42}\text{Cl}_2\text{N}_8\text{O}_2\text{S}_4$ |
| Formula weight    | 1142.18                                                               |



|                                                |                                          |
|------------------------------------------------|------------------------------------------|
| Temperature/K                                  | 296.15                                   |
| Crystal system                                 | triclinic                                |
| Space group                                    | P-1                                      |
| a/Å                                            | 12.1415(7)                               |
| b/Å                                            | 12.5166(6)                               |
| c/Å                                            | 19.4380(12)                              |
| $\alpha/^\circ$                                | 96.476(2)                                |
| $\beta/^\circ$                                 | 91.801(2)                                |
| $\gamma/^\circ$                                | 112.426(2)                               |
| Volume/Å <sup>3</sup>                          | 2704.2(3)                                |
| Z                                              | 2                                        |
| $\rho_{\text{calc}}/\text{cm}^3$               | 1.403                                    |
| $\mu/\text{mm}^{-1}$                           | 0.330                                    |
| F(000)                                         | 1180.0                                   |
| Crystal size/mm <sup>3</sup>                   | 0.15 × 0.12 × 0.1                        |
| Radiation                                      | MoK $\alpha$ ( $\lambda = 0.71073$ )     |
| 2 $\Theta$ range for data collection/ $^\circ$ | 3.552 to 54.98                           |
| Index ranges                                   | -15 ≤ h ≤ 12, -16 ≤ k ≤ 16, -25 ≤ l ≤ 24 |
| Reflections collected                          | 25923                                    |
| Independent reflections                        | 12341 [Rint = 0.0481, Rsigma = 0.0879]   |
| Data/restraints/parameters                     | 12341/0/714                              |
| Largest diff. peak/hole / e Å <sup>-3</sup>    | 0.63/-0.69                               |

## 9、 Synthesis of Substrates

**Step 1:** General procedure for the synthesis of 2-bromo-1-phenylethan-1-one (**S-20**):<sup>[2]</sup>

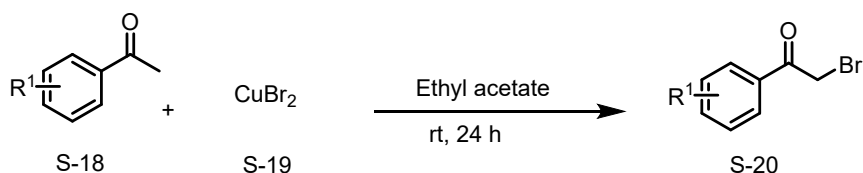

To the solution of substituted acetophenone **S-18** (5 mmol) in ethyl acetate (30 mL), copper(II)bromide (6 mmol) was added. The reaction mixture was allowed to stir at room temperature for about 24 hours. After **S-18** was consumed, the reaction solution was diluted with ethyl acetate (150 mL) and washed with saturated NH<sub>4</sub>Cl aqueous solution (150 mL) and H<sub>2</sub>O (150 mL). The separated organic layer was dried with anhydrous Na<sub>2</sub>SO<sub>4</sub> and filtered. The filtrate was concentrated under reduced pressure to get the desired product **S-20** in 95-99% yield.

**Step 2:** General procedure for the synthesis of substrates **S-22**:<sup>[3]</sup>

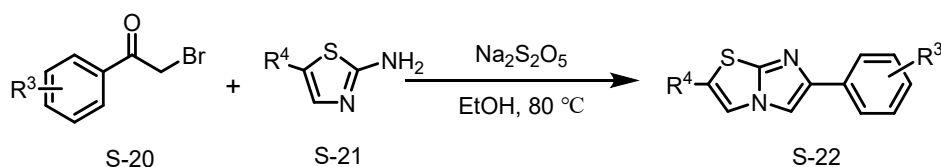

Substituted 2-bromo-1-phenylethan-1-ones (5 mmol, 1 eq), 2-aminothiazoles (5 mmol, 1 eq), Na<sub>2</sub>S<sub>2</sub>O<sub>5</sub> (5 mmol, 1 eq, 950 mg) and EtOH (30 mL) was placed in an oven-dried round bottom flask equipped with a magnetic stir bar. The reaction mixture was stirred at 80 °C for 24 hours. After **S-20** was consumed, the reaction solution was diluted with ethyl acetate (150 mL) and washed with brine (150 mL) and H<sub>2</sub>O (150 mL). The separated organic layer was dried with anhydrous Na<sub>2</sub>SO<sub>4</sub> and filtered. The filtrate was concentrated under reduced pressure to obtain a crude product, which was separated by column chromatography (eluent: petroleum ether = 3 : 1) to give the desired product **S-22**.

## 10. Characterization Data for Electrolysis Products

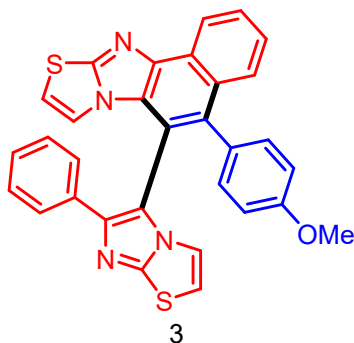

5-(4-methoxyphenyl)-6-(6-phenylimidazo[2,1-*b*]thiazol-5-yl)naphtho[1',2':4,5]imidazo[2,1-*b*]thiazole (**3**):

White solid; Eluent: dichloromethane/ethyl acetate/petroleum ether 10:20:30; 44.4 mg, 84%;

$^1\text{H}$  NMR (400 MHz, Chloroform-*d*)  $\delta$  8.84 (d,  $J = 8.2$  Hz, 1H), 7.84 (d,  $J = 8.5$  Hz, 1H), 7.76 (t,  $J = 7.6$  Hz, 1H), 7.62 - 7.56 (m, 2H), 7.52 (t,  $J = 7.0$  Hz, 1H), 7.20 (dd,  $J = 8.4, 2.2$  Hz, 1H), 7.14 (t,  $J = 2.8$  Hz, 3H), 6.96 (dd,  $J = 8.4, 2.3$  Hz, 1H), 6.84 - 6.76 (m, 3H), 6.65 - 6.55 (m, 3H), 3.73 (s, 3H);  $^{13}\text{C}$  NMR (101 MHz, Chloroform-*d*)  $\delta$  158.92, 155.47, 149.34, 145.18, 144.12, 135.45, 133.80, 131.35, 131.32, 130.66, 129.64, 128.80, 127.96, 127.61, 127.55, 127.48, 125.84, 125.79, 124.63, 122.53, 118.43, 117.44, 116.59, 113.70, 113.62, 113.47, 112.65, 111.97, 55.27; HRMS (ESI-TOF) Calcd for  $\text{C}_{31}\text{H}_{21}\text{N}_4\text{OS}_2$  [ $\text{M}+\text{H}$ ] $^+$ : 529.1151; found: 529.1151.

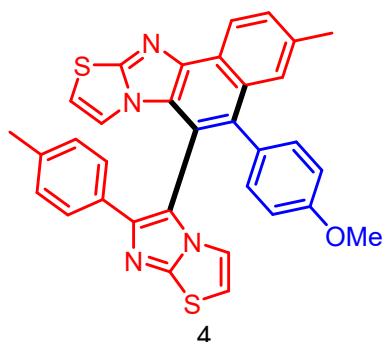

5-(4-methoxyphenyl)-3-methyl-6-(6-(*p*-tolyl)imidazo[2,1-*b*]thiazol-5-yl)naphtho[1',2':4,5]imidazo[2,1-*b*]thiazole (**4**):

Pale yellow solid; Eluent: dichloromethane/ethyl acetate/petroleum ether 10:15:30;

47.3 mg, 85%;

$^1\text{H}$  NMR (400 MHz, Chloroform-*d*)  $\delta$  8.73 (d,  $J = 7.3$  Hz, 1H), 7.61 (d,  $J = 9.1$  Hz, 2H), 7.49 (d,  $J = 8.2$  Hz, 2H), 7.21 (dd,  $J = 8.4, 2.3$  Hz, 1H), 7.01 - 6.91 (m, 3H), 6.82 (dd,  $J = 8.4, 2.8$  Hz, 1H), 6.80 - 6.74 (m, 2H), 6.65 - 6.58 (m, 2H), 6.56 (d,  $J = 4.6$  Hz, 1H), 3.75 (s, 3H), 2.49 (s, 3H), 2.23 (s, 3H);  $^{13}\text{C}$  NMR (101 MHz, Chloroform-*d*)  $\delta$  158.84, 155.37, 149.20, 145.34, 144.21, 137.33, 135.51, 134.87, 131.41, 131.35, 131.11, 130.87, 129.86, 129.56, 129.52, 127.01, 125.70, 125.52, 124.32, 122.45, 118.55, 117.46, 116.24, 113.82, 113.68, 113.46, 112.27, 111.68, 55.27, 22.16, 21.28; HRMS (ESI-TOF) Calcd for  $\text{C}_{33}\text{H}_{25}\text{N}_4\text{OS}_2$   $[\text{M}+\text{H}]^+$ : 557.1464; found: 557.1467.

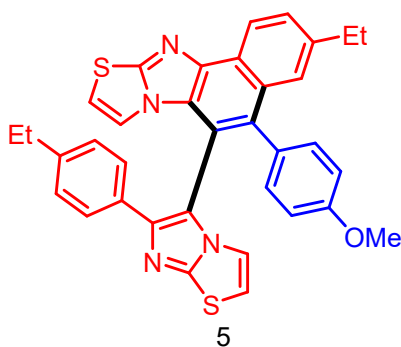

3-ethyl-6-(6-(4-ethylphenyl)imidazo[2,1-*b*]thiazol-5-yl)-5-(4-methoxyphenyl)naphtho[1',2':4,5]imidazo[2,1-*b*]thiazole (**5**):

White solid; Eluent: dichloromethane/ethyl acetate/petroleum ether 10:15:30; 51.4 mg, 88%;

$^1\text{H}$  NMR (400 MHz, Chloroform-*d*)  $\delta$  8.76 (d,  $J = 8.4$  Hz, 1H), 7.69 - 7.60 (m, 2H), 7.51 (d,  $J = 8.3$  Hz, 2H), 7.21 (dd,  $J = 8.4, 2.3$  Hz, 1H), 7.02 - 6.92 (m, 3H), 6.82 (dd,  $J = 8.4, 2.8$  Hz, 1H), 6.78 (d,  $J = 4.5$  Hz, 2H), 6.67 - 6.51 (m, 3H), 3.75 (s, 3H), 2.78 (q,  $J = 7.5$  Hz, 2H), 2.53 (q,  $J = 7.6$  Hz, 2H), 1.27 (t,  $J = 7.6$  Hz, 3H), 1.13 (d,  $J = 7.6$  Hz, 3H);  $^{13}\text{C}$  NMR (101 MHz, Chloroform-*d*)  $\delta$  158.83, 155.35, 149.16, 145.32, 144.18, 143.68, 141.87, 135.06, 131.40, 131.24, 130.88, 129.85, 128.42, 128.30, 125.96, 125.80, 125.77, 124.37, 122.60, 118.57, 117.46, 116.30, 113.74, 113.65, 113.45, 112.32, 111.68, 55.27, 29.49, 28.59, 15.96, 15.37; HRMS (ESI-TOF) Calcd for  $\text{C}_{35}\text{H}_{29}\text{N}_4\text{OS}_2$   $[\text{M}+\text{H}]^+$ : 585.1777; found: 585.1779.

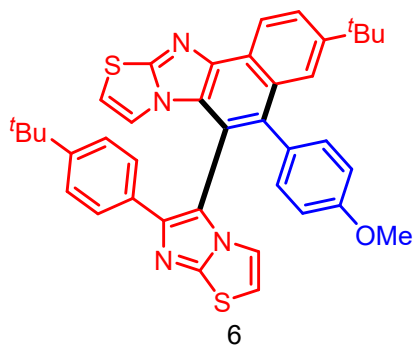

3-(*tert*-butyl)-6-(6-(4-(*tert*-butyl)phenyl)imidazo[2,1-*b*]thiazol-5-yl)-5-(4-methoxyphenyl)naphtho[1',2':4,5]imidazo[2,1-*b*]thiazole (**6**):

Pale yellow solid; Eluent: dichloromethane/ethyl acetate/petroleum ether 10:20:30; 41.6 mg, 65%;

$^1\text{H}$  NMR (400 MHz, Chloroform-*d*)  $\delta$  8.77 (d,  $J = 8.6$  Hz, 1H), 7.90 - 7.81 (m, 2H), 7.57 - 7.49 (m, 2H), 7.26 - 7.19 (m, 1H), 7.16 (d,  $J = 8.6$  Hz, 2H), 7.00 (dd,  $J = 8.5$ , 2.2 Hz, 1H), 6.82 (dd,  $J = 8.4$ , 2.7 Hz, 1H), 6.77 (dd,  $J = 7.6$ , 4.4 Hz, 2H), 6.65 - 6.54 (m, 3H), 3.75 (s, 3H), 1.34 (s, 9H), 1.22 (s, 9H);  $^{13}\text{C}$  NMR (101 MHz, Chloroform-*d*)  $\delta$  158.82, 155.33, 150.56, 149.13, 148.50, 145.27, 144.00, 135.51, 131.48, 131.38, 130.90, 130.51, 129.81, 126.19, 125.72, 125.55, 125.51, 124.55, 123.33, 122.30, 118.65, 117.45, 116.42, 113.60, 113.56, 113.42, 112.37, 111.67, 55.27, 35.24, 34.62, 31.44, 31.30; HRMS (ESI-TOF) Calcd for  $\text{C}_{39}\text{H}_{37}\text{N}_4\text{OS}_2$   $[\text{M}+\text{H}]^+$ : 641.2403; found: 641.2404.

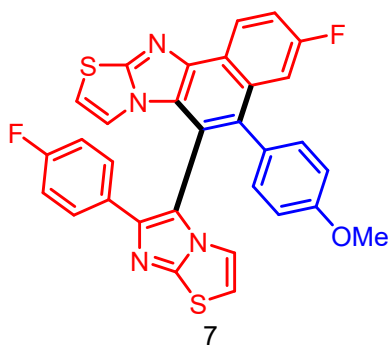

3-fluoro-6-(6-(4-fluorophenyl)imidazo[2,1-*b*]thiazol-5-yl)-5-(4-methoxyphenyl)naphtho[1',2':4,5]imidazo[2,1-*b*]thiazole (**7**):

Pale yellow solid; Eluent: dichloromethane/ethyl acetate/petroleum ether 10:22:30; 28.2 mg, 50%;

$^1\text{H}$  NMR (400 MHz, Chloroform-*d*)  $\delta$  8.81 (dd,  $J = 9.0, 5.8$  Hz, 1H), 7.56 - 7.48 (m, 3H), 7.44 (dd,  $J = 11.4, 2.5$  Hz, 1H), 7.15 (dd,  $J = 8.4, 2.3$  Hz, 1H), 6.92 - 6.79 (m, 5H), 6.76 (d,  $J = 4.0$  Hz, 1H), 6.68 (d,  $J = 3.9$  Hz, 1H), 6.63 (dd,  $J = 8.5, 2.8$  Hz, 2H), 3.75 (s, 3H);  $^{13}\text{C}$  NMR (101 MHz, Chloroform-*d*)  $\delta$  163.63, 162.15, 161.17, 159.72, 159.15, 155.83, 149.49, 144.15 (d,  $J = 7.1$  Hz), 134.76, 134.72, 131.94 (d,  $J = 9.1$  Hz), 131.14 (d,  $J = 4.0$  Hz), 129.73, 129.07, 127.67 (d,  $J = 8.1$  Hz), 124.99 (d,  $J = 9.1$  Hz), 124.17 (d,  $J = 10.1$  Hz), 118.31, 117.56, 117.45, 117.31, 116.04, 115.84 (d,  $J = 21.2$  Hz), 114.34, 113.86 (d,  $J = 29.3$  Hz), 113.13, 112.37, 112.03, 111.80, 55.33;  $^{19}\text{F}$  NMR (376 MHz, Chloroform-*d*)  $\delta$  -113.68, -113.76; HRMS (ESI-TOF) Calcd for  $\text{C}_{31}\text{H}_{19}\text{F}_2\text{N}_4\text{OS}_2$   $[\text{M}+\text{H}]^+$ : 565.0963; found: 565.0962.

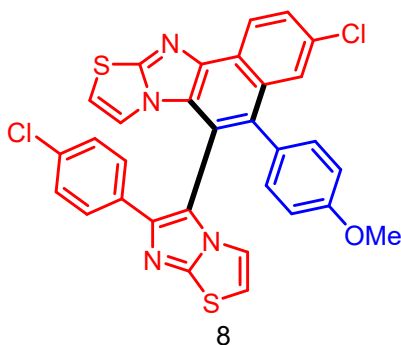

3-chloro-6-(6-(4-chlorophenyl)imidazo[2,1-*b*]thiazol-5-yl)-5-(4-methoxyphenyl)naphtho[1',2':4,5]imidazo[2,1-*b*]thiazole (**8**):

Pale yellow solid; Eluent: dichloromethane/ethyl acetate/petroleum ether 10:20:30; 36.4 mg, 61%;

$^1\text{H}$  NMR (400 MHz, Chloroform-*d*)  $\delta$  8.75 (d,  $J = 8.8$  Hz, 1H), 7.78 (d,  $J = 2.0$  Hz, 1H), 7.70 (dd,  $J = 8.7, 2.0$  Hz, 1H), 7.47 (d,  $J = 8.6$  Hz, 2H), 7.18 - 7.08 (m, 3H), 6.89 (dd,  $J = 8.5, 2.2$  Hz, 1H), 6.83 (dd,  $J = 11.3, 3.2$  Hz, 2H), 6.71 (dd,  $J = 17.9, 4.3$  Hz, 2H), 6.63 (dd,  $J = 8.5, 2.7$  Hz, 2H), 3.75 (s, 3H);  $^{13}\text{C}$  NMR (101 MHz, Chloroform-*d*)  $\delta$  159.18, 156.00, 149.64, 144.14, 144.01, 134.65, 133.54, 132.17, 132.02, 131.57, 131.18, 129.04, 128.82, 128.38, 127.10, 126.86, 125.70, 124.59, 124.28, 118.20, 117.38, 116.40, 114.36, 114.03, 113.72, 113.22, 112.58, 55.33; HRMS (ESI-TOF) Calcd for  $\text{C}_{31}\text{H}_{19}\text{Cl}_2\text{N}_4\text{OS}_2$   $[\text{M}+\text{H}]^+$ : 597.0372; found: 597.0362.

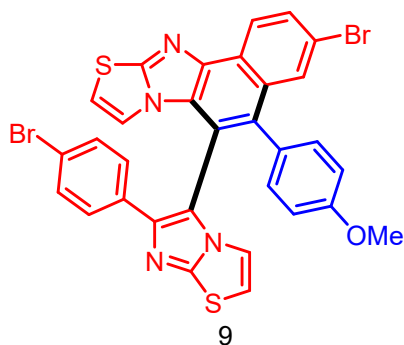

3-bromo-6-(6-(4-bromophenyl)imidazo[2,1-*b*]thiazol-5-yl)-5-(4-methoxyphenyl)naphtho[1',2':4,5]imidazo[2,1-*b*]thiazole (**9**):

Pale yellow solid; Eluent: dichloromethane/ethyl acetate/petroleum ether 10:20:30; 52.1 mg, 76%;

$^1\text{H}$  NMR (400 MHz, Chloroform-*d*)  $\delta$  8.65 (d,  $J = 8.7$  Hz, 1H), 7.93 (d,  $J = 1.9$  Hz, 1H), 7.80 (dd,  $J = 8.7, 1.9$  Hz, 1H), 7.40 (d,  $J = 6.7$  Hz, 2H), 7.25 (d,  $J = 5.2$  Hz, 2H), 7.13 (dd,  $J = 8.4, 2.3$  Hz, 1H), 6.88 (dd,  $J = 8.5, 2.3$  Hz, 1H), 6.84 (d,  $J = 4.5$  Hz, 1H), 6.81 (dd,  $J = 8.5, 2.7$  Hz, 1H), 6.69 (dd,  $J = 13.7, 4.5$  Hz, 2H), 6.62 (q,  $J = 3.2$  Hz, 2H), 3.74 (s, 3H);  $^{13}\text{C}$  NMR (101 MHz, Chloroform-*d*)  $\delta$  159.16, 155.97, 149.64, 144.17, 144.01, 134.55, 132.64, 131.94, 131.91, 131.16, 130.87, 130.01, 128.74, 127.35, 125.90, 124.58, 124.34, 121.74, 120.21, 118.14, 117.36, 116.41, 114.33, 114.01, 113.71, 113.21, 112.60, 55.31; HRMS (ESI-TOF) Calcd for  $\text{C}_{31}\text{H}_{19}\text{Br}_2\text{N}_4\text{OS}_2$   $[\text{M}+\text{H}]^+$ : 684.9362; found: 684.9360.

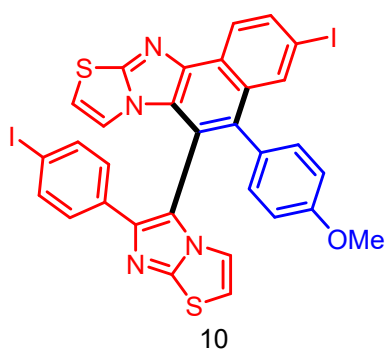

3-iodo-6-(6-(4-iodophenyl)imidazo[2,1-*b*]thiazol-5-yl)-5-(4-methoxyphenyl)naphtho[1',2':4,5]imidazo[2,1-*b*]thiazole (**10**):

Pale yellow solid; Eluent: dichloromethane/ethyl acetate/petroleum ether 10:15:30; 55.4 mg, 71%;

$^1\text{H}$  NMR (400 MHz, Chloroform-*d*)  $\delta$  8.54 (d,  $J$  = 8.6 Hz, 1H), 8.16 (d,  $J$  = 1.7 Hz, 1H), 8.01 (dd,  $J$  = 8.7, 1.7 Hz, 1H), 7.50 - 7.43 (m, 2H), 7.30 - 7.26 (m, 2H), 7.13 (dd,  $J$  = 8.4, 2.3 Hz, 1H), 6.89 (dd,  $J$  = 8.5, 2.3 Hz, 1H), 6.82 (q,  $J$  = 3.2 Hz, 2H), 6.69 (dd,  $J$  = 13.9, 4.5 Hz, 2H), 6.66 - 6.60 (m, 2H), 3.76 (s, 3H);  $^{13}\text{C}$  NMR (101 MHz, Chloroform-*d*)  $\delta$  159.17, 155.99, 149.63, 144.28, 144.06, 137.91, 136.51, 136.19, 134.41, 133.24, 132.27, 131.21, 131.17, 128.72, 127.53, 126.29, 124.69, 124.28, 118.16, 117.33, 116.52, 114.14, 114.03, 113.71, 113.22, 112.64, 93.41, 91.84, 55.33; HRMS (ESI-TOF) Calcd for  $\text{C}_{31}\text{H}_{19}\text{I}_2\text{N}_4\text{OS}_2$   $[\text{M}+\text{H}]^+$ : 780.9084; found: 780.9075.

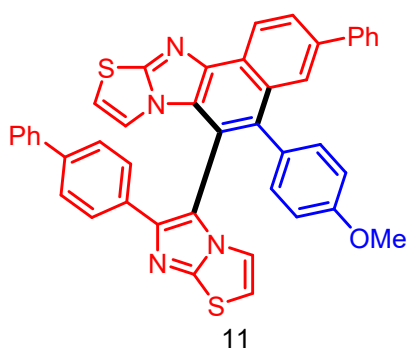

6-(6-([1,1'-biphenyl]-4-yl)imidazo[2,1-*b*]thiazol-5-yl)-5-(4-methoxyphenyl)-3-phenylnaphtho[1',2':4,5]imidazo[2,1-*b*]thiazole (**11**):

White solid; Eluent: dichloromethane/ethyl acetate/petroleum ether 10:20:30; 51.1 mg, 75%;

$^1\text{H}$  NMR (400 MHz, Chloroform-*d*)  $\delta$  8.92 (d,  $J$  = 8.4 Hz, 1H), 8.10 - 8.01 (m, 2H), 7.70 (d,  $J$  = 8.2 Hz, 2H), 7.62 (d,  $J$  = 7.1 Hz, 2H), 7.52 (d,  $J$  = 7.2 Hz, 2H), 7.47 - 7.40 (m, 4H), 7.37 (t,  $J$  = 7.6 Hz, 3H), 7.28 (dd,  $J$  = 7.9, 5.0 Hz, 2H), 7.06 (dd,  $J$  = 8.5, 2.2 Hz, 1H), 6.88 - 6.82 (m, 3H), 6.68 - 6.58 (m, 3H), 3.75 (s, 3H);  $^{13}\text{C}$  NMR (101 MHz, Chloroform-*d*)  $\delta$  158.97, 155.72, 149.47, 144.88, 144.09, 141.28, 140.45, 140.09, 138.64, 135.74, 132.78, 131.40, 130.99, 129.53, 129.01, 128.86, 127.59, 127.48, 127.42, 127.21, 126.89, 126.58, 126.20, 126.02, 124.76, 123.19, 118.49, 117.49, 116.68, 114.06, 113.86, 113.61, 112.74, 112.14, 55.29; HRMS (ESI-TOF) Calcd for  $\text{C}_{43}\text{H}_{29}\text{N}_4\text{OS}_2$   $[\text{M}+\text{H}]^+$ : 681.1777; found: 681.1775.



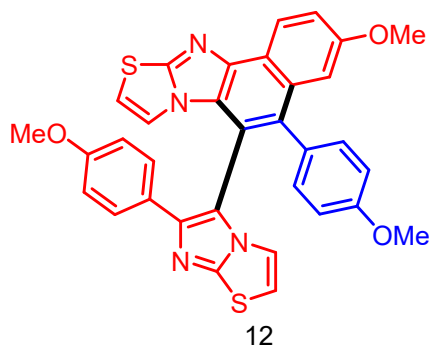

3-methoxy-5-(4-methoxyphenyl)-6-(6-(4-methoxyphenyl)imidazo[2,1-*b*]thiazol-5-yl)naphtho[1',2':4,5]imidazo[2,1-*b*]thiazole (Only <sup>1</sup>H NMR spectra data was obtained because of the poor solubility of product **12**) (**12**):

Pale yellow solid; Eluent: dichloromethane/ethyl acetate/petroleum ether 10:15:30; 29.4 mg, 50%;

<sup>1</sup>H NMR (400 MHz, Chloroform-*d*) δ 8.75 (d, *J* = 9.0 Hz, 1H), 7.53 (d, *J* = 8.5 Hz, 2H), 7.44 (dd, *J* = 8.9, 2.4 Hz, 1H), 7.23 (dd, *J* = 8.5, 2.3 Hz, 1H), 7.18 (d, *J* = 2.5 Hz, 1H), 6.96 (dd, *J* = 8.5, 2.3 Hz, 1H), 6.84 - 6.78 (m, 3H), 6.70 (d, *J* = 8.6 Hz, 2H), 6.68 - 6.57 (m, 3H), 3.77 (s, 3H), 3.75 (s, 3H), 3.72 (s, 3H); HRMS (ESI-TOF) Calcd for C<sub>33</sub>H<sub>25</sub>N<sub>4</sub>O<sub>3</sub>S<sub>2</sub> [M+H]<sup>+</sup>: 589.1363; found: 589.1357.

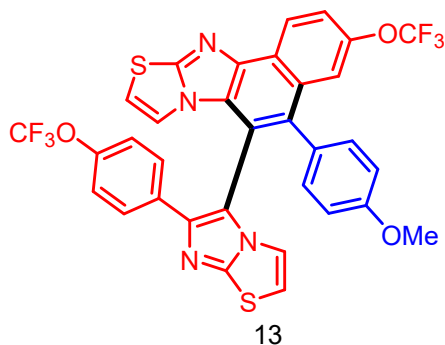

5-(4-methoxyphenyl)-3-(trifluoromethoxy)-6-(6-(4-(trifluoromethoxy)phenyl)imidazo[2,1-*b*]thiazol-5-yl)naphtho[1',2':4,5]imidazo[2,1-*b*]thiazole (**13**):

Pale yellow solid; Eluent: dichloromethane/ethyl acetate/petroleum ether 10:8:30; 28.6 mg, 41%;

<sup>1</sup>H NMR (400 MHz, Chloroform-*d*) δ 8.85 (d, *J* = 8.0 Hz, 1H), 7.63 (d, *J* = 12.4 Hz, 2H), 7.59 - 7.51 (m, 2H), 7.12 (dd, *J* = 8.4, 2.3 Hz, 1H), 7.00 (d, *J* = 8.0 Hz, 2H), 6.90

- 6.80 (m, 3H), 6.73 (d,  $J = 4.6$  Hz, 1H), 6.69 (d,  $J = 4.5$  Hz, 1H), 6.65 (d,  $J = 4.6$  Hz, 1H), 6.62 (dd,  $J = 8.5, 2.7$  Hz, 1H), 3.75 (s, 3H);  $^{13}\text{C}$  NMR (101 MHz, Chloroform-*d*)  $\delta$  159.21, 156.09, 149.74, 148.62, 147.10, 144.14, 143.99, 135.07, 132.50, 131.27, 131.23, 131.06, 128.70, 127.29, 125.86, 124.75, 124.71, 121.99, 121.77, 121.46, 121.19, 119.43, 119.27, 119.21, 118.16, 117.31, 116.46, 114.57, 114.04, 113.66, 113.29, 112.64, 55.30;  $^{19}\text{F}$  NMR (376 MHz, Chloroform-*d*)  $\delta$  -57.63, -57.81; HRMS (ESI-TOF) Calcd for  $\text{C}_{33}\text{H}_{19}\text{F}_6\text{N}_4\text{O}_3\text{S}_2$   $[\text{M}+\text{H}]^+$ : 697.0797; found: 697.0796.

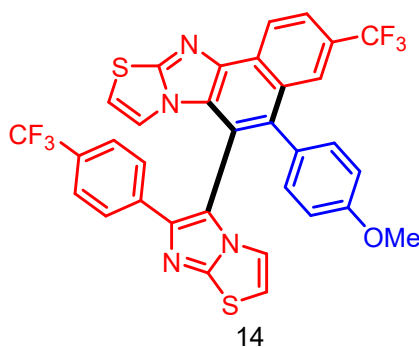

5-(4-methoxyphenyl)-3-(trifluoromethyl)-6-(6-(4-(trifluoromethyl)phenyl)imidazo[2,1-*b*]thiazol-5-yl)naphtho[1',2':4,5]imidazo[2,1-*b*]thiazole (**14**):

Pale yellow solid; Eluent: dichloromethane/ethyl acetate/petroleum ether 10:20:30; 27.9 mg, 42%;

$^1\text{H}$  NMR (400 MHz, Chloroform-*d*)  $\delta$  8.94 (d,  $J = 8.6$  Hz, 1H), 8.12 (s, 1H), 7.94 (dd,  $J = 8.6, 1.8$  Hz, 1H), 7.65 (d,  $J = 8.2$  Hz, 2H), 7.40 (d,  $J = 8.3$  Hz, 2H), 7.13 (dd,  $J = 8.4, 2.3$  Hz, 1H), 6.93 - 6.81 (m, 3H), 6.75 - 6.71 (m, 2H), 6.69 (d,  $J = 4.6$  Hz, 1H), 6.63 (dd,  $J = 8.5, 2.7$  Hz, 1H), 3.76 (s, 3H);  $^{13}\text{C}$  NMR (101 MHz, Chloroform-*d*)  $\delta$  159.34, 156.35, 150.00, 143.99, 143.84, 137.17, 136.17, 131.17, 131.10, 129.67, 129.57, 129.25, 129.01, 128.42, 127.97, 127.65, 125.95, 125.80 (q,  $J = 4.0$  Hz), 125.61 (q,  $J = 5.1$  Hz), 123.77, 123.47, 123.44, 123.14, 122.81, 118.01, 117.25, 117.19, 114.48, 114.11, 113.76, 113.74, 113.13, 55.33;  $^{19}\text{F}$  NMR (376 MHz, Chloroform-*d*)  $\delta$  -61.89, -62.60; HRMS (ESI-TOF) Calcd for  $\text{C}_{33}\text{H}_{19}\text{F}_6\text{N}_4\text{O}_3\text{S}_2$   $[\text{M}+\text{H}]^+$ : 665.0899; found: 665.0895.

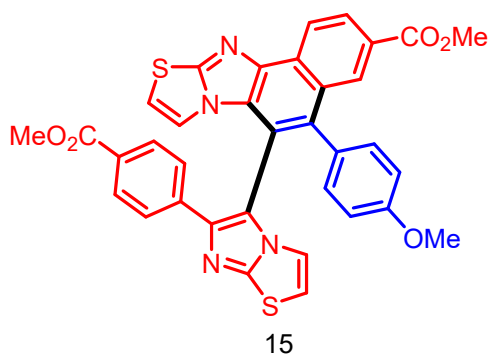

methyl 6-(6-(4-(methoxycarbonyl)phenyl)imidazo[2,1-*b*]thiazol-5-yl)-5-(4-methoxyphenyl)naphtho[1',2':4,5]imidazo[2,1-*b*]thiazole-3-carboxylate (**15**):

White solid; Eluent: dichloromethane/ethyl acetate/petroleum ether 10:20:30; 29.6 mg, 46%;

<sup>1</sup>H NMR (400 MHz, Chloroform-*d*) δ 8.88 (d, *J* = 8.6 Hz, 1H), 8.60 (d, *J* = 1.6 Hz, 1H), 8.37 (dd, *J* = 8.6, 1.6 Hz, 1H), 7.85 - 7.79 (m, 2H), 7.67 - 7.60 (m, 2H), 7.17 (dd, *J* = 8.4, 2.3 Hz, 1H), 6.92 (dd, *J* = 8.5, 2.3 Hz, 1H), 6.87 - 6.80 (m, 2H), 6.73 (dd, *J* = 14.8, 4.6 Hz, 2H), 6.65 (d, *J* = 4.6 Hz, 1H), 6.62 (dd, *J* = 8.5, 2.7 Hz, 1H), 3.92 (s, 3H), 3.83 (s, 3H), 3.76 (s, 3H); <sup>13</sup>C NMR (101 MHz, Chloroform-*d*) δ 167.34, 166.88, 159.28, 156.21, 149.92, 143.83, 136.74, 131.32, 131.22, 130.89, 130.21, 129.90, 129.09, 128.76, 127.55, 127.42, 125.73, 125.65, 122.98, 118.15, 117.56, 117.38, 114.10, 114.01, 113.73, 113.63, 112.94, 55.35, 52.44, 52.19; HRMS (ESI-TOF) Calcd for C<sub>35</sub>H<sub>25</sub>N<sub>4</sub>O<sub>5</sub>S<sub>2</sub> [M+H]<sup>+</sup>: 645.1261; found: 645.1268.

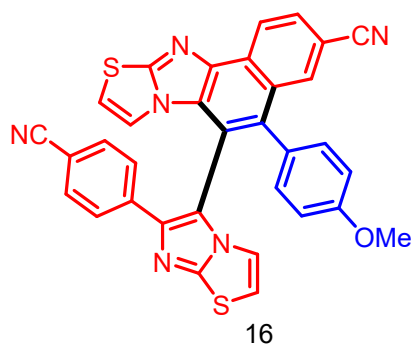

6-(6-(4-cyanophenyl)imidazo[2,1-*b*]thiazol-5-yl)-5-(4-methoxyphenyl)naphtho[1',2':4,5]imidazo[2,1-*b*]thiazole-3-carbonitrile (**16**):

Orange solid; Eluent: dichloromethane/ethyl acetate/petroleum ether 10:15:30; 11.6 mg, 20%;

$^1\text{H}$  NMR (400 MHz, Chloroform-*d*)  $\delta$  8.90 (d,  $J = 8.5$  Hz, 1H), 8.18 (d,  $J = 1.5$  Hz, 1H), 7.90 (dd,  $J = 8.5, 1.6$  Hz, 1H), 7.64 - 7.54 (m, 2H), 7.43 (d,  $J = 8.5$  Hz, 2H), 7.09 (dd,  $J = 8.4, 2.2$  Hz, 1H), 6.90 - 6.80 (m, 3H), 6.77 (d,  $J = 4.5$  Hz, 1H), 6.73 (d,  $J = 4.6$  Hz, 1H), 6.69 (d,  $J = 4.6$  Hz, 1H), 6.64 (dd,  $J = 8.5, 2.7$  Hz, 1H), 3.77 (s, 3H);  $^{13}\text{C}$  NMR (101 MHz, Chloroform-*d*)  $\delta$  159.56, 156.76, 150.35, 143.76, 143.52, 138.06, 135.75, 134.10, 132.68, 131.07, 130.99, 129.82, 129.15, 128.50, 127.87, 126.14, 125.89, 124.00, 119.43, 118.86, 117.83, 117.40, 117.15, 114.71, 114.29, 114.26, 113.99, 113.65, 110.96, 109.45, 55.41; HRMS (ESI-TOF) Calcd for  $\text{C}_{33}\text{H}_{19}\text{N}_6\text{OS}_2$   $[\text{M}+\text{H}]^+$ : 579.1056; found: 579.1044.

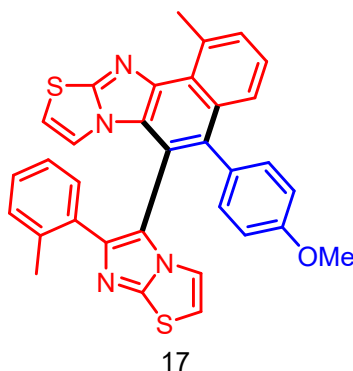

5-(4-methoxyphenyl)-1-methyl-6-(6-(*o*-tolyl)imidazo[2,1-*b*]thiazol-5-yl)naphtho[1',2':4,5]imidazo[2,1-*b*]thiazole (**17**):

White solid; Eluent: dichloromethane/ethyl acetate/petroleum ether 10:15:30; 41.7 mg, 75%;

$^1\text{H}$  NMR (400 MHz, Chloroform-*d*)  $\delta$  7.47 (dd,  $J = 18.0, 7.7$  Hz, 2H), 7.34 - 7.27 (m, 1H), 7.12 - 7.02 (m, 2H), 6.90 (d,  $J = 3.7$  Hz, 1H), 6.83 (s, 1H), 6.78 (dd,  $J = 8.1, 2.0$  Hz, 3H), 6.72 - 6.64 (m, 2H), 6.56 (dd,  $J = 8.4, 2.6$  Hz, 1H), 6.45 (s, 1H), 6.33 (dd,  $J = 8.4, 2.1$  Hz, 1H), 3.79 (s, 3H), 3.34 (s, 3H), 2.03 (s, 3H);  $^{13}\text{C}$  NMR (101 MHz, Chloroform-*d*)  $\delta$  158.67, 153.71, 148.23, 146.89, 144.50, 137.57, 136.73, 135.38, 133.00, 131.93, 131.68, 130.78, 130.67, 130.23, 129.91, 129.34, 127.75, 126.51, 126.16, 126.11, 125.28, 124.87, 118.17, 117.71, 117.01, 113.37, 113.34, 113.27, 112.88, 112.59, 55.35, 24.33, 20.70; HRMS (ESI-TOF) Calcd for  $\text{C}_{33}\text{H}_{25}\text{N}_4\text{OS}_2$   $[\text{M}+\text{H}]^+$ : 557.1464; found: 557.1478.

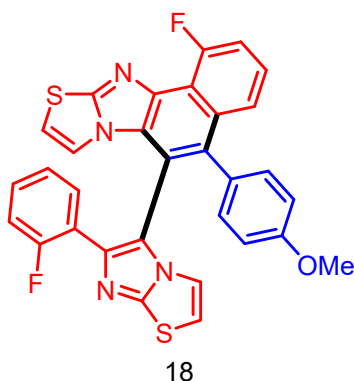

1-fluoro-6-(6-(2-fluorophenyl)imidazo[2,1-*b*]thiazol-5-yl)-5-(4-methoxyphenyl)naphtho[1',2':4,5]imidazo[2,1-*b*]thiazole (**18**):

Pale yellow solid; Eluent: dichloromethane/ethyl acetate/petroleum ether 10:22:30; 32.2 mg, 57%;

<sup>1</sup>H NMR (400 MHz, Chloroform-*d*) δ 7.46 (dd, *J* = 8.3, 1.3 Hz, 1H), 7.42 - 7.38 (m, 1H), 7.36 - 7.28 (m, 2H), 7.19 - 7.11 (m, 1H), 7.02 - 6.96 (m, 1H), 6.92 (d, *J* = 4.4 Hz, 1H), 6.85 (dd, *J* = 8.4, 2.2 Hz, 1H), 6.82 - 6.75 (m, 2H), 6.74 - 6.69 (m, 2H), 6.68 (d, *J* = 4.6 Hz, 1H), 6.61 (dd, *J* = 8.5, 2.2 Hz, 1H), 6.54 (dd, *J* = 8.5, 2.7 Hz, 1H), 3.76 (s, 3H); <sup>13</sup>C NMR (101 MHz, Chloroform-*d*) δ 160.54 (d, *J* = 48.5 Hz), 158.88, 158.04 (d, *J* = 53.5 Hz), 155.54 (d, *J* = 4.0 Hz), 149.49, 141.27, 140.70, 135.54, 133.01 (d, *J* = 5.1 Hz), 131.53, 130.95 (d, *J* = 3.0 Hz), 130.44, 129.68, 129.60 (d, *J* = 8.1 Hz), 125.79, 125.11 (d, *J* = 8.1 Hz), 124.14 (d, *J* = 4.0 Hz), 123.88 (d, *J* = 4.0 Hz), 121.76 (d, *J* = 13.1 Hz), 118.50, 118.09, 117.24, 117.09, 115.90, 115.67, 114.57, 113.78, 113.42 (d, *J* = 22.2 Hz), 112.77, 112.53 (d, *J* = 19.2 Hz), 55.35; <sup>19</sup>F NMR (376 MHz, Chloroform-*d*) δ -114.33, -115.40; HRMS (ESI-TOF) Calcd for C<sub>31</sub>H<sub>19</sub>F<sub>2</sub>N<sub>4</sub>OS<sub>2</sub> [M+H]<sup>+</sup>: 565.0963; found: 565.0962.

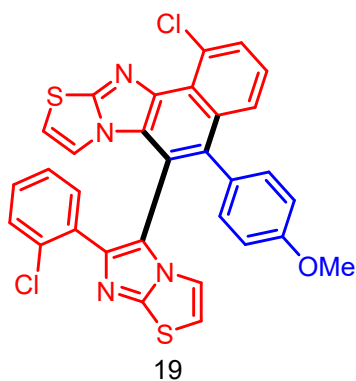

1-chloro-6-(6-(2-chlorophenyl)imidazo[2,1-*b*]thiazol-5-yl)-5-(4-methoxyphenyl)naphtho[1',2':4,5]imidazo[2,1-*b*]thiazole (**19**):

Pale yellow solid; Eluent: dichloromethane/ethyl acetate/petroleum ether 10:15:30; 12.5 mg, 21%;

<sup>1</sup>H NMR (400 MHz, Chloroform-*d*) δ 7.74 (d, *J* = 7.5 Hz, 1H), 7.60 (s, 1H), 7.29 (d, *J* = 7.5 Hz, 1H), 7.17 (dd, *J* = 8.0, 1.5 Hz, 1H), 7.15 - 7.08 (m, 1H), 7.04 - 6.97 (m, 1H), 6.92 - 6.83 (m, 3H), 6.77 (d, *J* = 4.6 Hz, 1H), 6.74 - 6.60 (m, 2H), 6.57 - 6.50 (m, 2H), 6.43 (dd, *J* = 8.4, 2.0 Hz, 1H), 3.80 (s, 3H); <sup>13</sup>C NMR (101 MHz, Chloroform-*d*) δ 158.87, 154.61, 148.96, 143.98, 142.41, 136.37, 133.03, 132.92, 132.63, 132.33, 131.83, 130.15, 130.07, 129.80, 129.76, 129.72, 129.17, 127.35, 126.45, 126.30, 124.95, 124.65, 118.71, 118.10, 116.94, 114.35, 114.26, 113.65, 113.54, 113.13, 55.41; HRMS (ESI-TOF) Calcd for C<sub>31</sub>H<sub>19</sub>Cl<sub>2</sub>N<sub>4</sub>OS<sub>2</sub> [M+H]<sup>+</sup>: 597.0372; found: 597.0369.

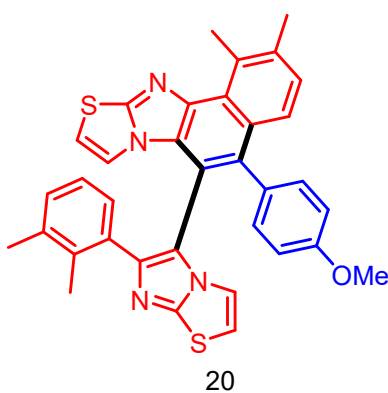

6-(6-(2,3-dimethylphenyl)imidazo[2,1-*b*]thiazol-5-yl)-5-(4-methoxyphenyl)-1,2-dimethylnaphtho[1',2':4,5]imidazo[2,1-*b*]thiazole (**20**):

White solid; Eluent: dichloromethane/ethyl acetate/petroleum ether 10:7:30; 39.7 mg, 68%;

$^1\text{H}$  NMR (400 MHz, Chloroform-*d*)  $\delta$  7.33 (d,  $J = 8.6$  Hz, 1H), 7.21 (d,  $J = 8.6$  Hz, 1H), 6.95 (d,  $J = 7.4$  Hz, 1H), 6.90 (d,  $J = 4.5$  Hz, 1H), 6.81 - 6.76 (m, 2H), 6.73 - 6.61 (m, 3H), 6.58 - 6.44 (m, 2H), 6.36 (d,  $J = 4.6$  Hz, 1H), 6.30 (dd,  $J = 8.4, 2.2$  Hz, 1H), 3.80 (s, 3H), 3.32 (s, 3H), 2.53 (s, 3H), 2.22 (s, 3H), 1.88 (s, 3H);  $^{13}\text{C}$  NMR (101 MHz, Chloroform-*d*)  $\delta$  158.60, 153.06, 148.04, 147.17, 144.23, 137.09, 136.77, 136.13, 136.10, 133.03, 132.91, 131.87, 130.82, 130.66, 130.21, 129.39, 128.05, 127.99, 126.77, 126.42, 125.53, 124.85, 118.41, 117.74, 117.08, 113.39, 113.16, 112.55, 111.86, 55.32, 21.22, 20.73, 18.52, 16.81; HRMS (ESI-TOF) Calcd for  $\text{C}_{35}\text{H}_{29}\text{N}_4\text{OS}_2$   $[\text{M}+\text{H}]^+$ : 585.1777; found: 585.1778.

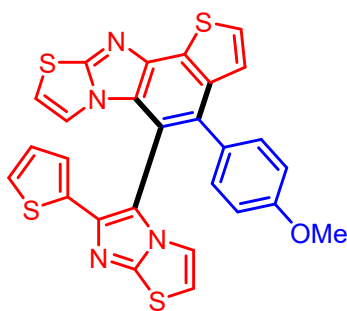

4-(4-methoxyphenyl)-5-(6-(thiophen-2-yl)imidazo[2,1-*b*]thiazol-5-yl)thieno[3",2":5',6']benzo[1',2':4,5]imidazo[2,1-*b*]thiazole (**21**):

Pale yellow solid; Eluent: dichloromethane/ethyl acetate/petroleum ether 10:15:30; 24.3 mg, 45%;

$^1\text{H}$  NMR (400 MHz, Chloroform-*d*)  $\delta$  7.48 (d,  $J = 5.4$  Hz, 1H), 7.37 (d,  $J = 5.4$  Hz, 2H), 7.12 (dd,  $J = 5.0, 1.2$  Hz, 1H), 7.02 (d,  $J = 9.5$  Hz, 1H), 6.91 (d,  $J = 4.6$  Hz, 1H), 6.85 (dd,  $J = 3.7, 1.2$  Hz, 2H), 6.80 (dd,  $J = 5.0, 3.6$  Hz, 1H), 6.76 (d,  $J = 4.5$  Hz, 1H), 6.63 (d,  $J = 9.4$  Hz, 1H), 6.58 (d,  $J = 4.5$  Hz, 2H), 3.74 (s, 3H);  $^{13}\text{C}$  NMR (101 MHz, Chloroform-*d*)  $\delta$  159.04, 156.86, 149.69, 142.59, 141.64, 137.35, 137.09, 132.47, 131.52, 130.87, 130.35, 127.98, 125.42, 125.34, 125.03, 125.00, 123.10, 118.93, 117.44, 115.33, 113.99, 113.66, 112.60, 111.53, 109.57, 55.32; HRMS (ESI-TOF) Calcd for  $\text{C}_{27}\text{H}_{17}\text{N}_4\text{OS}_4$   $[\text{M}+\text{H}]^+$ : 541.028; found: 541.0281.

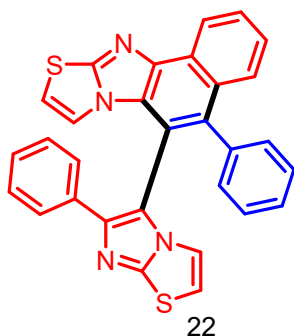

5-phenyl-6-(6-phenylimidazo[2,1-*b*]thiazol-5-yl)naphtho[1',2':4,5]imidazo[2,1-*b*]thiazole (**22**):

Pale yellow solid; Eluent: dichloromethane/ethyl acetate/petroleum ether 10:7:30; 18.9 mg, 38%;

<sup>1</sup>H NMR (400 MHz, Chloroform-*d*) δ 8.85 (d, *J* = 8.3 Hz, 1H), 7.85 - 7.73 (m, 2H), 7.57 (dd, *J* = 6.7, 2.9 Hz, 2H), 7.54 - 7.48 (m, 1H), 7.27 (d, *J* = 5.1 Hz, 2H), 7.23 - 7.11 (m, 4H), 7.10 - 7.00 (m, 2H), 6.81 (dd, *J* = 13.7, 4.5 Hz, 2H), 6.61 (dd, *J* = 10.3, 4.5 Hz, 2H); <sup>13</sup>C NMR (101 MHz, Chloroform-*d*) δ 155.59, 149.39, 145.37, 144.28, 137.56, 135.74, 133.82, 130.40, 130.24, 130.19, 128.78, 128.48, 127.92, 127.69, 127.61, 127.48, 125.94, 125.85, 124.64, 122.56, 118.43, 117.45, 116.43, 113.52, 112.59, 112.04; HRMS (ESI-TOF) Calcd for C<sub>30</sub>H<sub>19</sub>N<sub>4</sub>S<sub>2</sub> [M+H]<sup>+</sup>: 499.1046; found: 499.1045.

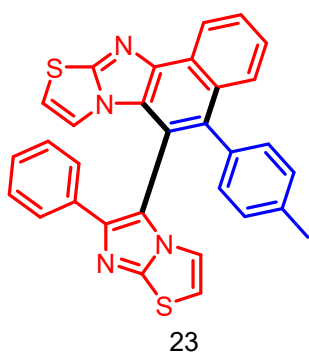

6-(6-phenylimidazo[2,1-*b*]thiazol-5-yl)-5-(*p*-tolyl)naphtho[1',2':4,5]imidazo[2,1-*b*]thiazole (**23**):

Pale yellow solid; Eluent: dichloromethane/ethyl acetate/petroleum ether 10:20:30; 15.4 mg, 30%;



$^1\text{H}$  NMR (400 MHz, Chloroform-*d*)  $\delta$  8.84 (d,  $J = 8.1$  Hz, 1H), 7.82 (d,  $J = 8.4$  Hz, 1H), 7.79 - 7.73 (m, 1H), 7.58 (dd,  $J = 6.8, 3.0$  Hz, 2H), 7.54 - 7.48 (m, 1H), 7.19 - 7.11 (m, 4H), 7.07 (d,  $J = 7.9$  Hz, 1H), 6.95 - 6.87 (m, 2H), 6.84 (d,  $J = 4.4$  Hz, 1H), 6.77 (d,  $J = 4.6$  Hz, 1H), 6.65 (d,  $J = 4.5$  Hz, 1H), 6.60 (d,  $J = 4.6$  Hz, 1H), 2.27 (s, 3H);  $^{13}\text{C}$  NMR (101 MHz, Chloroform-*d*)  $\delta$  155.47, 149.27, 144.95, 144.08, 137.31, 136.00, 134.42, 133.58, 130.57, 130.04, 129.98, 129.28, 128.82, 128.43, 128.04, 127.70, 127.62, 127.45, 125.91, 125.81, 124.61, 122.54, 118.39, 117.54, 116.58, 113.33, 112.77, 112.10, 21.30; HRMS (ESI-TOF) Calcd for  $\text{C}_{31}\text{H}_{21}\text{N}_4\text{S}_2$   $[\text{M}+\text{H}]^+$ : 513.1202; found: 513.1202.

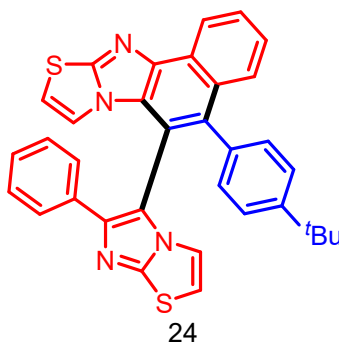

5-(4-(*tert*-butyl)phenyl)-6-(6-phenylimidazo[2,1-*b*]thiazol-5-yl)naphtho[1',2':4,5]imidazo[2,1-*b*]thiazole (**24**):

Pale yellow solid; Eluent: dichloromethane/ethyl acetate/petroleum ether 10:11:30; 24.9 mg, 45%;

$^1\text{H}$  NMR (400 MHz, Chloroform-*d*)  $\delta$  8.84 (d,  $J = 9.7$  Hz, 1H), 7.92 (d,  $J = 8.5$  Hz, 1H), 7.80 - 7.73 (m, 1H), 7.59 - 7.48 (m, 3H), 7.28 (dd,  $J = 8.0, 2.1$  Hz, 1H), 7.21 (dd,  $J = 8.0, 2.0$  Hz, 1H), 7.16 - 7.10 (m, 3H), 7.05 (dd,  $J = 8.1, 2.1$  Hz, 1H), 6.94 (dd,  $J = 8.1, 2.0$  Hz, 1H), 6.84 (d,  $J = 4.6$  Hz, 1H), 6.77 (d,  $J = 4.5$  Hz, 1H), 6.57 (d,  $J = 4.5$  Hz, 2H), 1.24 (s, 9H);  $^{13}\text{C}$  NMR (101 MHz, Chloroform-*d*)  $\delta$  155.46, 150.43, 149.40, 145.37, 144.17, 135.63, 134.37, 133.87, 130.39, 130.12, 129.84, 128.75, 128.07, 127.58, 127.52, 127.47, 125.95, 125.76, 125.30, 124.63, 124.50, 122.52, 118.55, 117.69, 116.70, 113.56, 112.14, 111.81, 34.62, 31.35; HRMS (ESI-TOF) Calcd for  $\text{C}_{34}\text{H}_{27}\text{N}_4\text{S}_2$   $[\text{M}+\text{H}]^+$ : 555.1672; found: 555.1673.

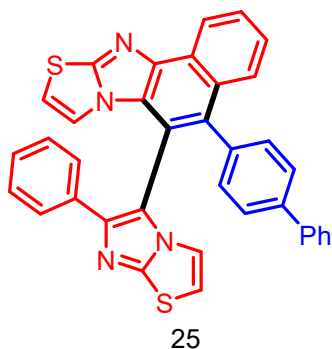

5-([1,1'-biphenyl]-4-yl)-6-(6-phenylimidazo[2,1-*b*]thiazol-5-yl)naphtho[1',2':4,5]imidazo[2,1-*b*]thiazole (**25**):

White solid; Eluent: dichloromethane/ethyl acetate/petroleum ether 10:20:30; 27.6 mg, 48%;

$^1\text{H}$  NMR (400 MHz, Chloroform-*d*)  $\delta$  8.87 (d,  $J = 8.2$  Hz, 1H), 7.90 (d,  $J = 8.5$  Hz, 1H), 7.80 (d,  $J = 7.5$  Hz, 1H), 7.62 - 7.48 (m, 6H), 7.42 (t,  $J = 7.5$  Hz, 2H), 7.37 - 7.28 (m, 3H), 7.19 - 7.13 (m, 3H), 7.09 (dd,  $J = 8.0, 1.8$  Hz, 1H), 6.83 (dd,  $J = 19.2, 4.3$  Hz, 2H), 6.63 (dd,  $J = 8.1, 4.1$  Hz, 2H);  $^{13}\text{C}$  NMR (101 MHz, Chloroform-*d*)  $\delta$  155.65, 149.48, 145.39, 144.33, 140.57, 140.21, 136.56, 135.37, 133.77, 130.71, 130.69, 130.42, 128.92, 128.83, 127.95, 127.71, 127.68, 127.55, 127.52, 127.12, 127.09, 126.36, 126.01, 125.95, 124.68, 122.63, 118.49, 117.45, 116.44, 113.54, 112.80, 112.14; HRMS (ESI-TOF) Calcd for  $\text{C}_{36}\text{H}_{23}\text{N}_4\text{S}_2$   $[\text{M}+\text{H}]^+$ : 575.1359; found: 575.1358.

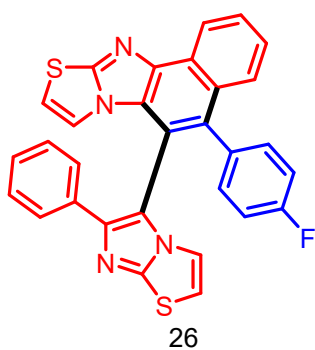

5-(4-fluorophenyl)-6-(6-phenylimidazo[2,1-*b*]thiazol-5-yl)naphtho[1',2':4,5]imidazo[2,1-*b*]thiazole (**26**):

White solid; Eluent: dichloromethane/ethyl acetate/petroleum ether 10:20:30; 23.7 mg, 46%;

$^1\text{H}$  NMR (400 MHz, Chloroform-*d*)  $\delta$  8.85 (d,  $J = 7.5$  Hz, 1H), 7.77 (dd,  $J = 14.0, 7.2$  Hz, 2H), 7.57 - 7.49 (m, 3H), 7.24 - 7.18 (m, 1H), 7.17 - 7.11 (m, 3H), 7.01 - 6.91 (m, 2H), 6.82 (d,  $J = 4.4$  Hz, 1H), 6.80 - 6.71 (m, 2H), 6.67 (d,  $J = 4.4$  Hz, 1H), 6.62 (d,  $J = 4.4$  Hz, 1H);  $^{13}\text{C}$  NMR (101 MHz, Chloroform-*d*)  $\delta$  163.41, 160.96, 155.73, 149.50, 145.50, 144.40, 134.54, 133.75, 133.44 (d,  $J = 3.0$  Hz), 131.98 (d,  $J = 8.1$  Hz), 131.68 (d,  $J = 8.1$  Hz), 130.39, 128.81, 127.71, 127.66 (d,  $J = 4.0$  Hz), 127.47, 125.99, 125.94, 124.61, 122.65, 118.35, 117.19, 116.17, 115.49 (d,  $J = 21.2$  Hz), 114.93, 114.71, 113.75, 113.00, 112.24;  $^{19}\text{F}$  NMR (376 MHz, Chloroform-*d*)  $\delta$  -114.27; HRMS (ESI-TOF) Calcd for  $\text{C}_{30}\text{H}_{18}\text{FN}_4\text{S}_2$   $[\text{M}+\text{H}]^+$ : 517.0951; found: 517.0954.

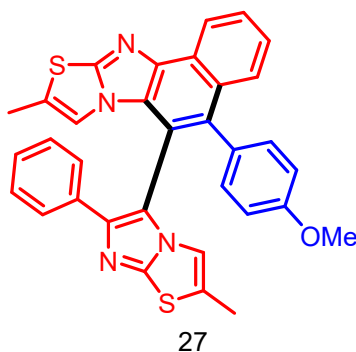

5-(4-methoxyphenyl)-9-methyl-6-(2-methyl-6-phenylimidazo[2,1-*b*]thiazol-5-yl)naphtho[1',2':4,5]imidazo[2,1-*b*]thiazole (**27**):

Pale yellow solid; Eluent: dichloromethane/ethyl acetate/petroleum ether 10:10:30; 28.9 mg, 52%;

$^1\text{H}$  NMR (400 MHz, Chloroform-*d*)  $\delta$  8.80 (d,  $J = 8.3$  Hz, 1H), 7.78 (d,  $J = 8.5$  Hz, 1H), 7.75 - 7.69 (m, 1H), 7.54 (dd,  $J = 7.5, 2.2$  Hz, 2H), 7.5 - 7.43 (m, 1H), 7.18 - 7.10 (m, 4H), 6.91 (dd,  $J = 8.5, 2.3$  Hz, 1H), 6.83 - 6.76 (m, 1H), 6.59 (dd,  $J = 8.5, 2.8$  Hz, 1H), 6.54 (d,  $J = 1.5$  Hz, 1H), 6.43 (d,  $J = 1.6$  Hz, 1H), 3.73 (s, 3H), 2.26 (d,  $J = 1.4$  Hz, 3H), 2.23 (d,  $J = 1.5$  Hz, 3H);  $^{13}\text{C}$  NMR (101 MHz, Chloroform-*d*)  $\delta$  158.82, 154.98, 148.62, 143.95, 143.08, 135.35, 134.09, 131.37, 131.12, 130.50, 129.81, 128.65, 127.94, 127.39, 127.34, 127.23, 126.66, 125.96, 125.73, 125.44, 124.74, 122.32, 116.44, 114.54, 113.91, 113.71, 113.57, 113.21, 55.23, 14.24, 14.16; HRMS (ESI-TOF) Calcd for  $\text{C}_{33}\text{H}_{25}\text{N}_4\text{OS}_2$   $[\text{M}+\text{H}]^+$ : 557.1464; found: 557.1466.

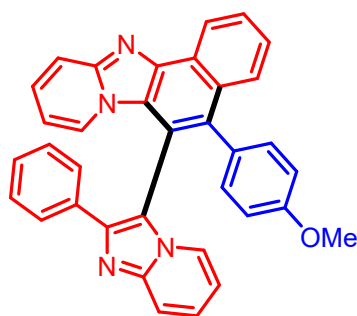

28

5-(4-methoxyphenyl)-6-(2-phenylimidazo[1,2-*a*]pyridin-3-yl)naphtho[1',2':4,5]imidazo[1,2-*a*]pyridine (**28**):

White solid; Eluent: dichloromethane/ethyl acetate/petroleum ether 10:20:30; 21.7 mg, 42%;

$^1\text{H}$  NMR (400 MHz, Chloroform-*d*)  $\delta$  9.05 (d,  $J = 9.6$  Hz, 1H), 7.89 (d,  $J = 9.2$  Hz, 1H), 7.82 (t,  $J = 7.0$  Hz, 1H), 7.73 (dd,  $J = 14.7, 8.7$  Hz, 2H), 7.67 - 7.61 (m, 2H), 7.60 - 7.54 (m, 1H), 7.47 (d,  $J = 6.8$  Hz, 1H), 7.36 - 7.27 (m, 2H), 7.25 - 7.13 (m, 4H), 6.96 (dd,  $J = 8.4, 2.3$  Hz, 1H), 6.77 (dd,  $J = 8.5, 2.3$  Hz, 1H), 6.72 - 6.64 (m, 1H), 6.61 (dd,  $J = 8.4, 2.7$  Hz, 1H), 6.51 (dd,  $J = 8.3, 2.7$  Hz, 2H), 3.68 (s, 3H);  $^{13}\text{C}$  NMR (101 MHz, Chloroform-*d*)  $\delta$  158.92, 148.14, 144.65, 143.49, 141.49, 137.75, 132.99, 132.10, 131.08, 130.02, 129.40, 128.82, 128.36, 128.27, 127.86, 127.47, 126.99, 126.78, 126.07, 125.28, 123.47, 123.33, 122.66, 117.97, 117.27, 115.27, 113.39, 113.35, 113.09, 113.01, 112.55, 55.20; HRMS (ESI-TOF) Calcd for  $\text{C}_{35}\text{H}_{25}\text{N}_4\text{O}$   $[\text{M}+\text{H}]^+$ : 517.2023; found: 517.2022.

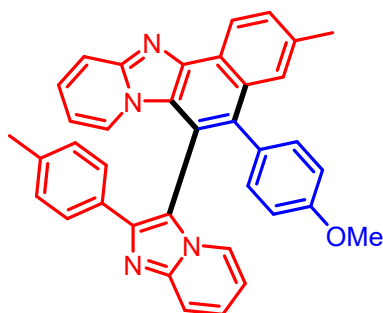

29

5-(4-methoxyphenyl)-3-methyl-6-(2-(*p*-tolyl)imidazo[1,2-*a*]pyridin-3-yl)naphtho[1',2':4,5]imidazo[1,2-*a*]pyridine (**29**):

White solid; Eluent: dichloromethane/ethyl acetate/petroleum ether 10:20:30; 21.7 mg, 40%;

$^1\text{H}$  NMR (400 MHz, Chloroform-*d*)  $\delta$  8.94 (d,  $J = 8.3$  Hz, 1H), 7.85 (d,  $J = 9.2$  Hz, 1H), 7.70 - 7.60 (m, 2H), 7.54 (d,  $J = 8.3$  Hz, 2H), 7.51 (s, 1H), 7.43 (d,  $J = 6.9$  Hz, 1H), 7.32 - 7.26 (m, 1H), 7.26 - 7.23 (m, 1H), 7.21 - 7.15 (m, 1H), 7.02 - 6.94 (m, 3H), 6.82 (dd,  $J = 8.4, 2.3$  Hz, 1H), 6.66 - 6.58 (m, 2H), 6.53 (dd,  $J = 8.4, 2.7$  Hz, 1H), 6.49 - 6.44 (m, 1H), 3.68 (s, 3H), 2.48 (s, 3H), 2.23 (s, 3H);  $^{13}\text{C}$  NMR (101 MHz, Chloroform-*d*)  $\delta$  158.79, 148.25, 144.81, 143.96, 141.82, 138.03, 137.07, 136.56, 132.31, 131.14, 130.62, 130.13, 129.70, 129.50, 127.91, 127.42, 126.79, 125.57, 125.47, 125.39, 123.41, 123.21, 122.41, 117.89, 117.25, 114.95, 113.45, 113.30, 113.06, 112.85, 112.21, 55.17, 22.18, 21.33; HRMS (ESI-TOF) Calcd for  $\text{C}_{37}\text{H}_{29}\text{N}_4\text{O}$   $[\text{M}+\text{H}]^+$ : 545.2336; found: 545.2332.

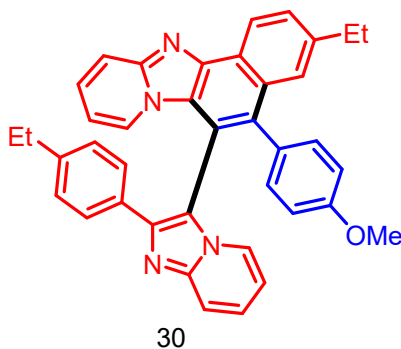

3-ethyl-6-(2-(4-ethylphenyl)imidazo[1,2-*a*]pyridin-3-yl)-5-(4-methoxyphenyl)naphtho[1',2':4,5]imidazo[1,2-*a*]pyridine (**30**):

White solid; Eluent: dichloromethane/ethyl acetate/petroleum ether 10:20:30; 25.7 mg, 45%;

$^1\text{H}$  NMR (400 MHz, Chloroform-*d*)  $\delta$  8.97 (d,  $J = 8.4$  Hz, 1H), 7.85 (d,  $J = 9.1$  Hz, 1H), 7.71 (dd,  $J = 8.4, 1.7$  Hz, 1H), 7.63 (d,  $J = 9.0$  Hz, 1H), 7.59 - 7.51 (m, 3H), 7.41 (d,  $J = 6.8$  Hz, 1H), 7.32 - 7.27 (m, 1H), 7.24 (d,  $J = 7.0$  Hz, 1H), 7.16 (dd,  $J = 8.7, 7.1$  Hz, 1H), 6.99 (dd,  $J = 8.3, 4.1$  Hz, 3H), 6.82 (dd,  $J = 8.4, 2.3$  Hz, 1H), 6.65 - 6.56 (m, 2H), 6.52 (dd,  $J = 8.4, 2.8$  Hz, 1H), 6.46 (t,  $J = 6.9$  Hz, 1H), 3.69 (s, 3H), 2.77 (q,  $J = 7.6$  Hz, 2H), 2.54 (q,  $J = 7.6$  Hz, 2H), 1.26 (t,  $J = 7.6$  Hz, 3H), 1.14 (t,  $J = 7.6$  Hz, 3H);  $^{13}\text{C}$  NMR (101 MHz, Chloroform-*d*)  $\delta$  158.75, 148.33, 145.01, 144.35, 144.18, 142.82, 141.96, 137.14, 132.33, 131.24, 131.14, 130.16, 129.79, 128.45, 128.22, 127.76, 126.90, 126.37, 125.88, 125.44, 125.15, 123.36, 122.53, 117.95, 117.38,

114.99, 113.62, 113.25, 113.03, 112.65, 112.09, 55.18, 29.52, 28.64, 15.96, 15.37;  
HRMS (ESI-TOF) Calcd for  $C_{39}H_{33}N_4O$   $[M+H]^+$ : 573.2649; found: 573.2646.

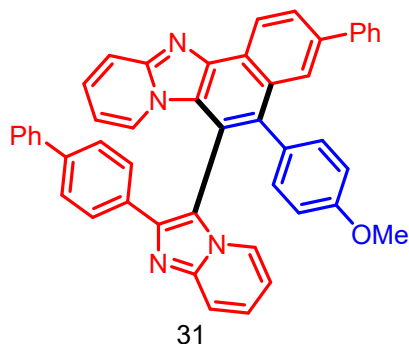

6-(2-([1,1'-biphenyl]-4-yl)imidazo[1,2-*a*]pyridin-3-yl)-5-(4-methoxyphenyl)-3-phenylnaphtho[1',2':4,5]imidazo[1,2-*a*]pyridine (**31**):

White solid; Eluent: dichloromethane/ethyl acetate/petroleum ether 10:20:30; 27.4 mg, 41%;

$^1H$  NMR (400 MHz, Chloroform-*d*)  $\delta$  9.14 (d,  $J = 8.5$  Hz, 1H), 8.11 (dd,  $J = 8.5, 1.8$  Hz, 1H), 7.98 (d,  $J = 1.8$  Hz, 1H), 7.90 (d,  $J = 9.3$  Hz, 1H), 7.76 (d,  $J = 8.3$  Hz, 2H), 7.70 (d,  $J = 9.1$  Hz, 1H), 7.60 (d,  $J = 7.1$  Hz, 2H), 7.51 (dd,  $J = 11.3, 7.6$  Hz, 3H), 7.43 (t,  $J = 7.5$  Hz, 4H), 7.40 - 7.32 (m, 4H), 7.29 (dd,  $J = 7.1, 2.9$  Hz, 2H), 7.25 - 7.20 (m, 1H), 7.04 (dd,  $J = 8.4, 2.3$  Hz, 1H), 6.91 (dd,  $J = 8.5, 2.3$  Hz, 1H), 6.70 - 6.59 (m, 2H), 6.58 - 6.48 (m, 2H), 3.69 (s, 3H);  $^{13}C$  NMR (101 MHz, Chloroform-*d*)  $\delta$  158.91, 148.52, 145.01, 141.80, 141.19, 140.65, 140.44, 139.55, 137.80, 132.44, 131.20, 130.14, 129.42, 129.01, 128.86, 128.12, 127.66, 127.58, 127.49, 127.36, 127.31, 126.94, 126.70, 126.32, 125.67, 125.38, 123.95, 123.43, 122.88, 118.09, 117.43, 115.34, 113.82, 113.50, 113.21, 113.07, 112.42, 55.20; HRMS (ESI-TOF) Calcd for  $C_{47}H_{33}N_4O$   $[M+H]^+$ : 669.2649; found: 669.2640.

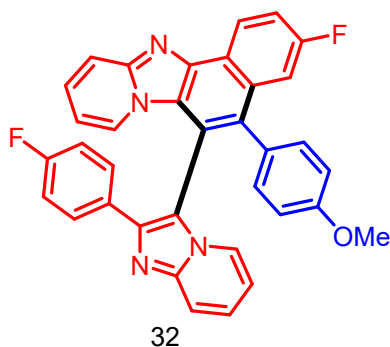

3-fluoro-6-(2-(4-fluorophenyl)imidazo[1,2-*a*]pyridin-3-yl)-5-(4-methoxyphenyl)naphtho[1',2':4,5]imidazo[1,2-*a*]pyridine (**32**):

White solid; Eluent: dichloromethane/ethyl acetate/petroleum ether 10:20:30; 24.3 mg, 44%;

$^1\text{H}$  NMR (400 MHz, Chloroform-*d*)  $\delta$  9.04 (dd,  $J = 9.0, 5.8$  Hz, 1H), 7.88 (d,  $J = 9.3$  Hz, 1H), 7.65 (d,  $J = 9.3$  Hz, 1H), 7.60 - 7.53 (m, 3H), 7.44 (d,  $J = 6.9$  Hz, 1H), 7.40 - 7.29 (m, 2H), 7.26 - 7.17 (m, 2H), 6.96 - 6.81 (m, 3H), 6.73 (dd,  $J = 8.5, 2.3$  Hz, 1H), 6.66 (t,  $J = 6.8$  Hz, 1H), 6.61 (dd,  $J = 8.4, 2.7$  Hz, 1H), 6.56 - 6.48 (m, 2H), 3.69 (s, 3H);  $^{13}\text{C}$  NMR (101 MHz, Chloroform-*d*)  $\delta$  163.95, 162.70, 161.49, 160.26, 159.06, 146.87 (d,  $J = 345.4$  Hz), 143.35, 141.93, 136.68, 133.51 (d,  $J = 9.1$  Hz), 130.99, 129.88, 129.84, 129.09, 128.74 (d,  $J = 8.1$  Hz), 128.29, 125.74 (d,  $J = 9.1$  Hz), 125.59, 125.24, 124.38, 123.30, 122.39, 118.10, 117.57, 117.33 (d,  $J = 24.2$  Hz), 115.72 (d,  $J = 22.2$  Hz), 114.70, 114.45, 113.21 (d,  $J = 11.1$  Hz), 113.15, 112.47, 112.26, 55.24;  $^{19}\text{F}$  NMR (376 MHz, Chloroform-*d*)  $\delta$  -112.68, -113.45; HRMS (ESI-TOF) Calcd for  $\text{C}_{35}\text{H}_{23}\text{F}_2\text{N}_4\text{O}$  [ $\text{M}+\text{H}$ ] $^+$ : 553.1834; found: 553.1833.

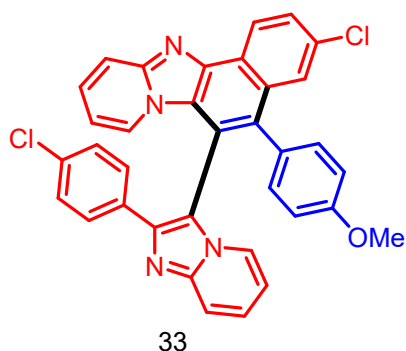

3-chloro-6-(2-(4-chlorophenyl)imidazo[1,2-*a*]pyridin-3-yl)-5-(4-methoxyphenyl)naphtho[1',2':4,5]imidazo[1,2-*a*]pyridine (**33**):

White solid; Eluent: dichloromethane/ethyl acetate/petroleum ether 10:20:30; 23.4 mg, 40%;

$^1\text{H}$  NMR (400 MHz, Chloroform-*d*)  $\delta$  8.98 (d,  $J$  = 8.7 Hz, 1H), 7.87 (d,  $J$  = 9.4 Hz, 1H), 7.77 (dd,  $J$  = 8.7, 2.1 Hz, 1H), 7.70 (d,  $J$  = 2.0 Hz, 1H), 7.67 (d,  $J$  = 9.1 Hz, 1H), 7.53 (d,  $J$  = 8.6 Hz, 2H), 7.45 (d,  $J$  = 6.7 Hz, 1H), 7.39 - 7.30 (m, 1H), 7.23 (d,  $J$  = 7.9 Hz, 1H), 7.19 (d,  $J$  = 7.1 Hz, 1H), 7.16 - 7.10 (m, 2H), 6.91 (dd,  $J$  = 8.4, 2.3 Hz, 1H), 6.75 (dd,  $J$  = 8.3, 2.2 Hz, 1H), 6.68 (t,  $J$  = 6.8 Hz, 1H), 6.61 (dd,  $J$  = 8.4, 2.7 Hz, 1H), 6.58 - 6.48 (m, 2H), 3.70 (s, 3H);  $^{13}\text{C}$  NMR (101 MHz, Chloroform-*d*)  $\delta$  159.13, 148.62, 145.05, 141.70, 136.61, 134.19, 133.03, 132.97, 131.94, 131.00, 129.93, 129.00, 128.75, 128.52, 128.47, 128.17, 127.19, 125.88, 125.18, 125.02, 123.35, 122.76, 118.20, 117.57, 115.05, 114.27, 113.69, 113.38, 113.31, 112.65, 55.25; HRMS (ESI-TOF) Calcd for  $\text{C}_{35}\text{H}_{23}\text{Cl}_2\text{N}_4\text{O}$   $[\text{M}+\text{H}]^+$ : 585.1243; found: 585.1243.

## 11. Reference

- [1] W.-J. Guan, K. Ying, C.-C. Yuan, J.-L. Hang, C.-K. Liu, X.-X. Huang, Z. Fang and K. Guo, Catalyst- and oxidant-free electrooxidative site-selective 3/4+2 annulation to fused polycyclic heteroaromatics, *Green Chem.*, 2022, **24**, 5191-5196.
- [2] R. Aeluri, M. Alla, S. Polepalli and N. Jain, Eur. Synthesis and antiproliferative activity of imidazo[1,2-*a*]pyrimidine Mannich bases, *J. Med. Chem.*, 2015, **100**, 18-23.
- [3] M. F. Baig, V. L. Nayak, P. Budaganaboyina, K. Mullagiri, S. Sunkari, J. Gour and A. Kamal, Synthesis and biological evaluation of imidazo[2,1-*b*]thiazole-benzimidazole conjugates as microtubule-targeting agents, *Bioorg. Chem.*, 2018, **77**, 515-526.

## 12. NMR Spectra for Electrolysis Products and 34-37, S5, S10



5-(4-methoxyphenyl)-6-(6-phenylimidazo[2,1-*b*]thiazol-5-yl)naphtho[1',2':4,5]imidazo[2,1-*b*]thiazole (**3**):

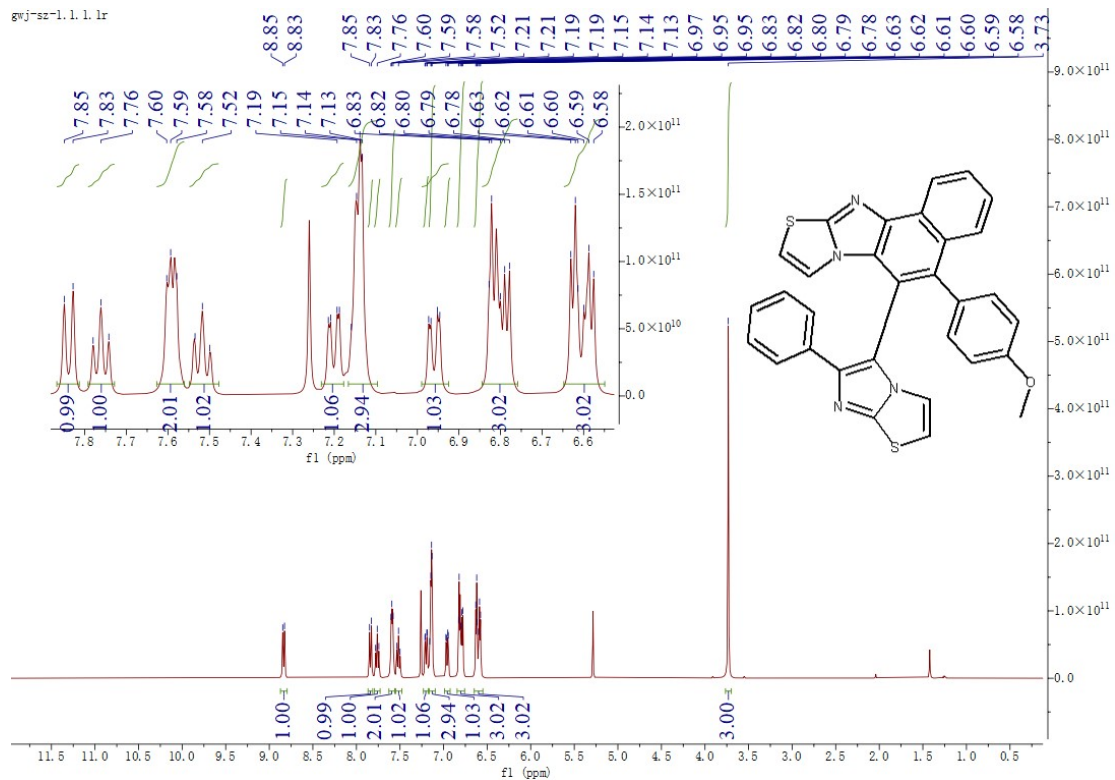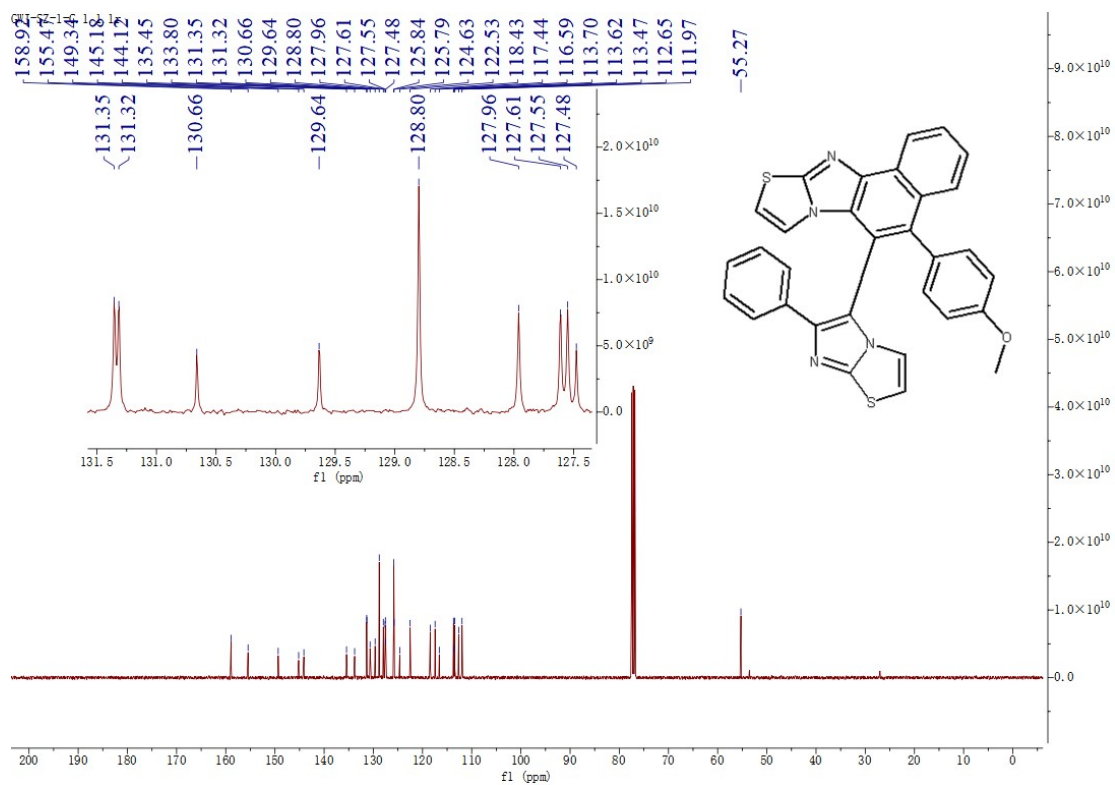

6-(4-methoxyphenyl)-3-methyl-6-(6-(*p*-tolyl)imidazo[2,1-*b*]thiazol-5-yl)naphtho[1',2':4,5]imidazo[2,1-*b*]thiazole (4):

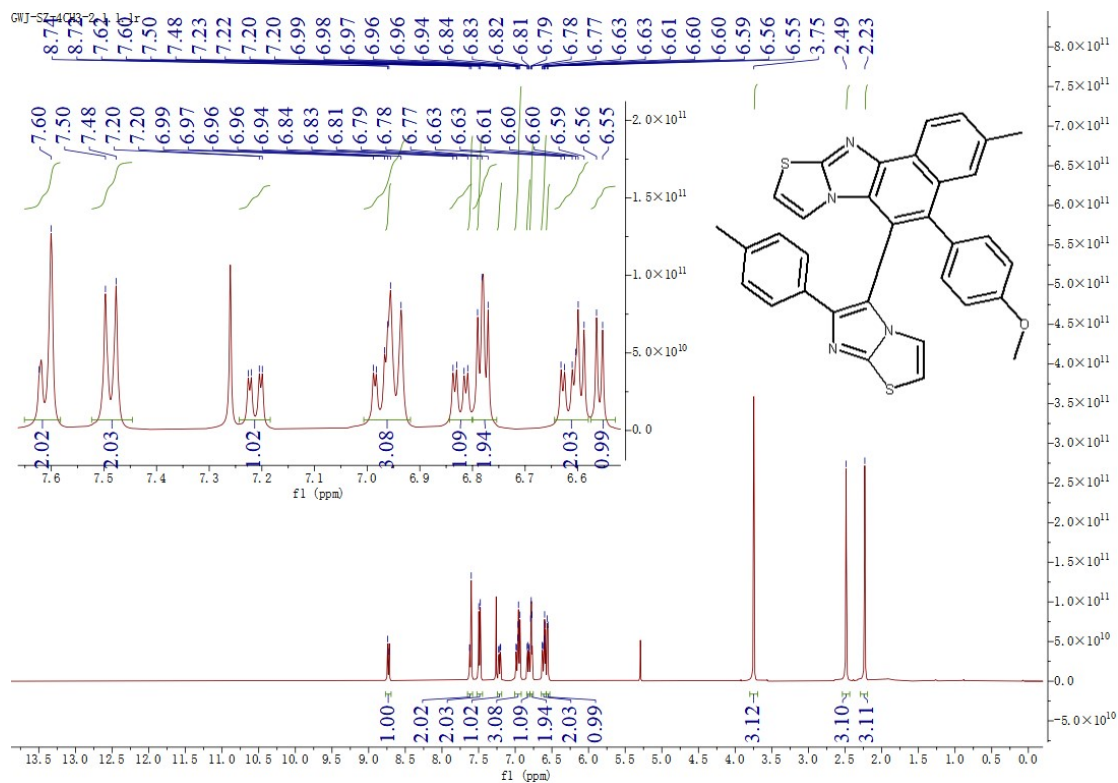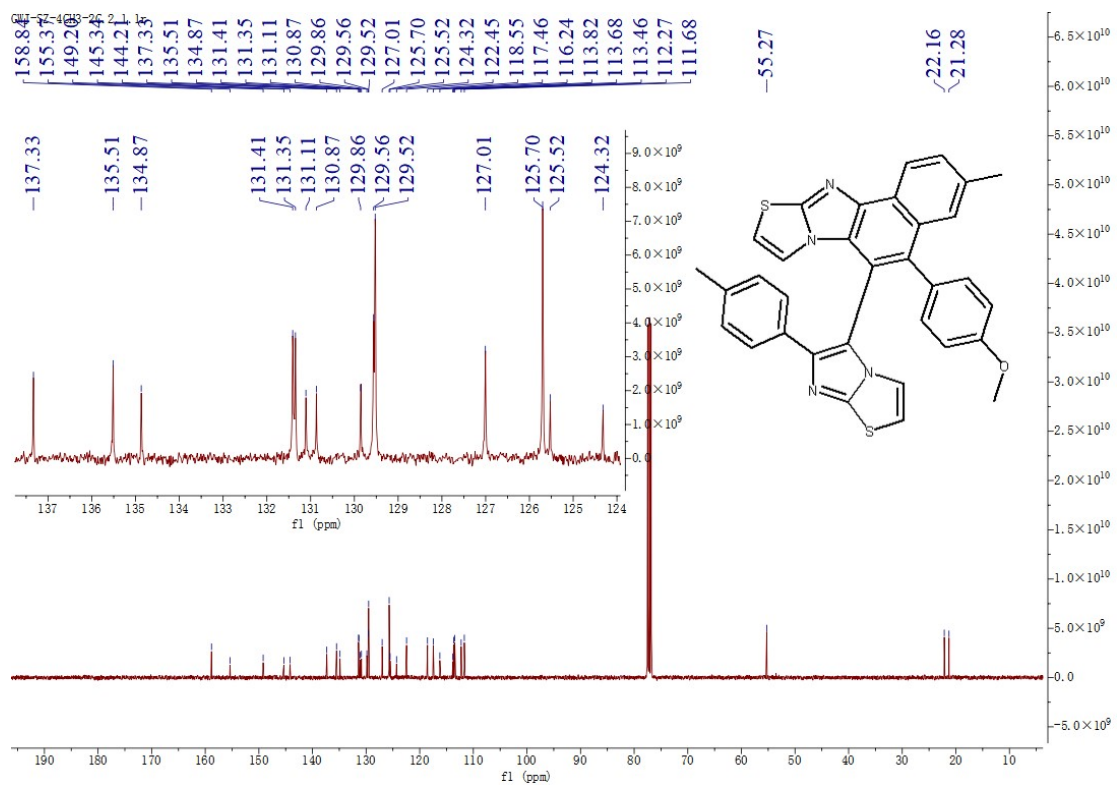

3-ethyl-6-(6-(4-ethylphenyl)imidazo[2,1-b]thiazol-5-yl)-5-(4-methoxyphenyl)naphtho[1',2':4,5]imidazo[2,1-b]thiazole (**5**):

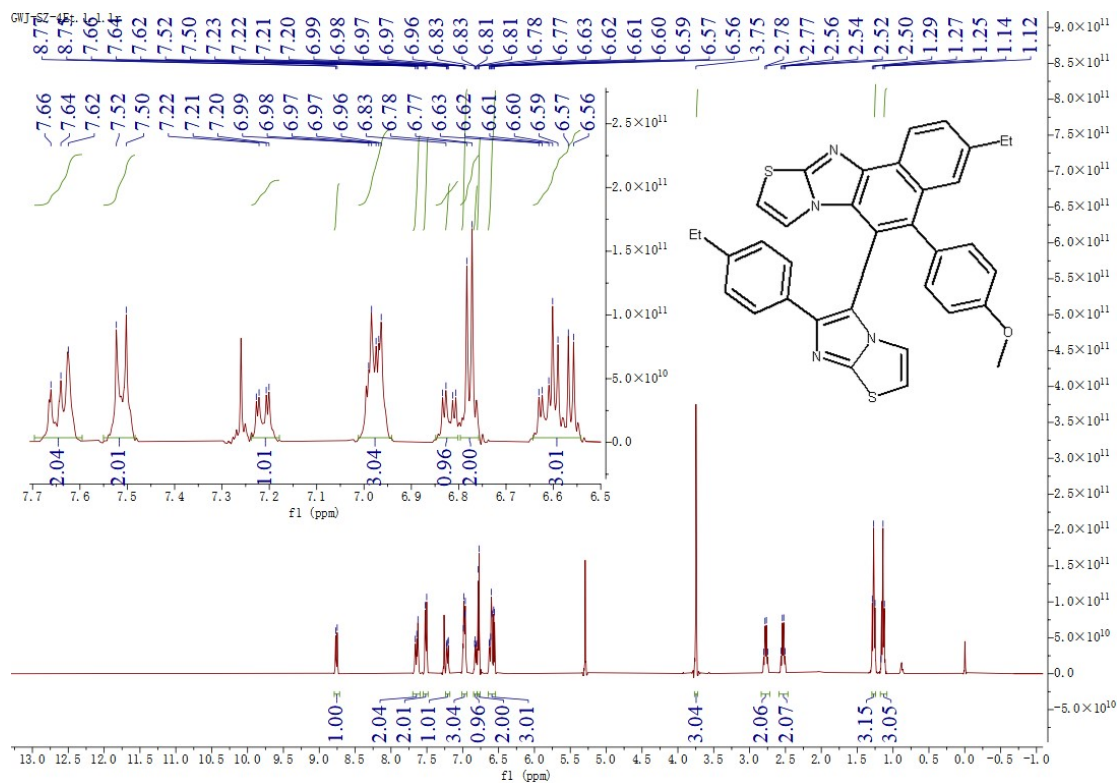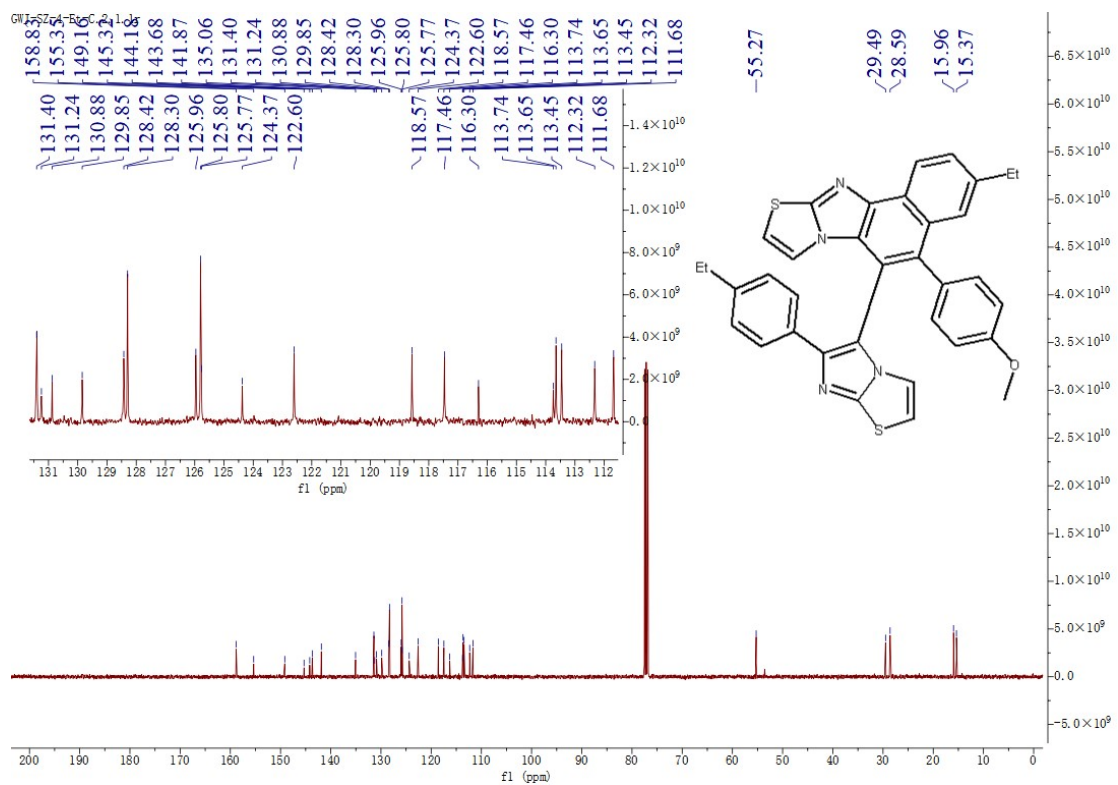



3-fluoro-6-(6-(4-fluorophenyl)imidazo[2,1-b]thiazol-5-yl)-5-(4-methoxyphenyl)naphtho[1',2':4,5]imidazo[2,1-b]thiazole (7):

GWJ-5Z-4F.1.1.1r

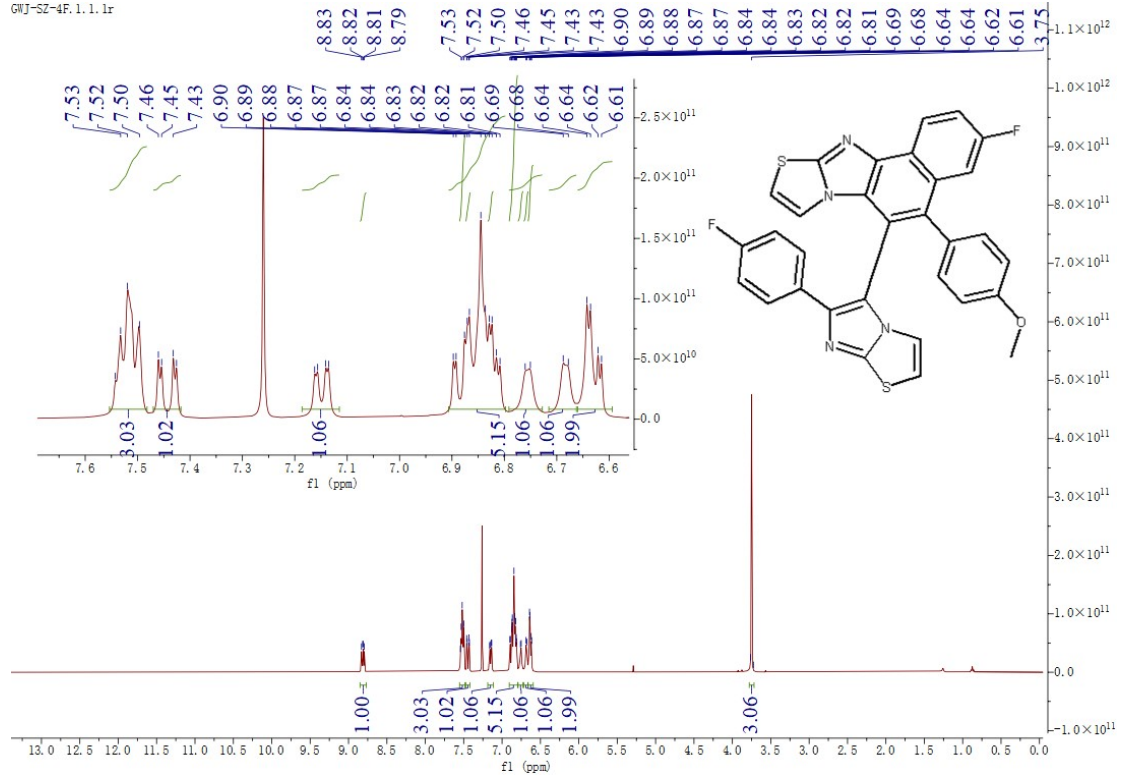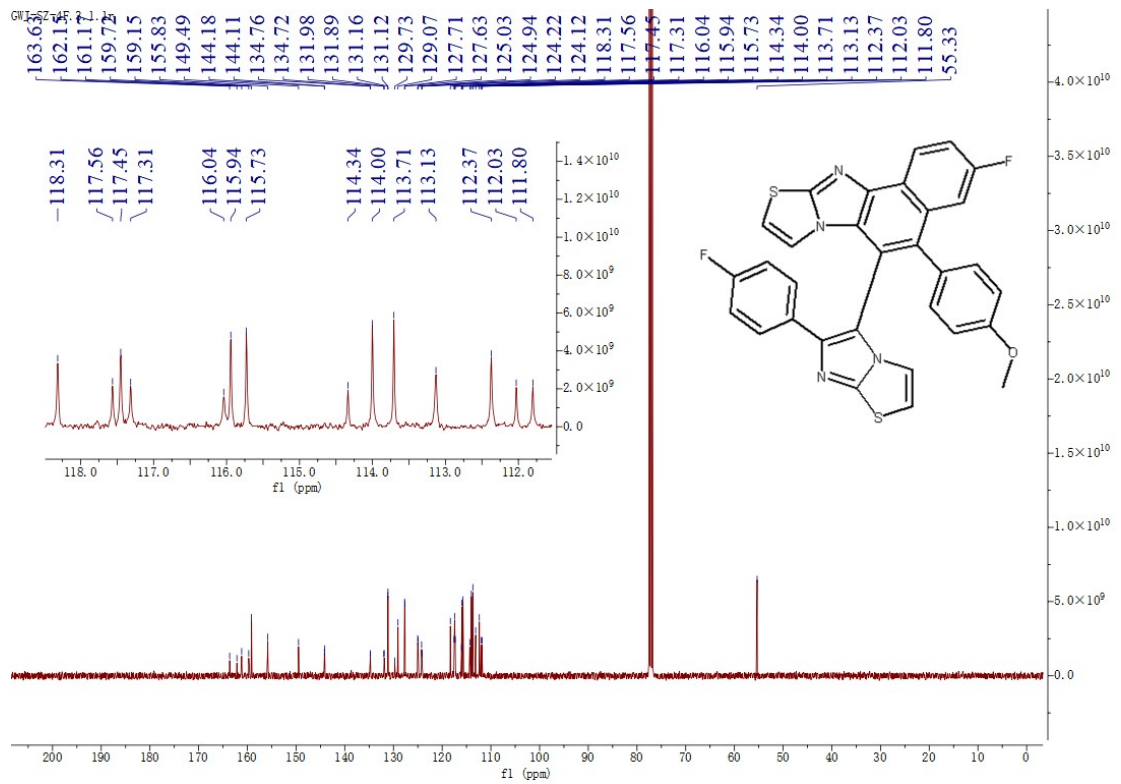

GWJ-SZ-4F. 2. 1. 1r

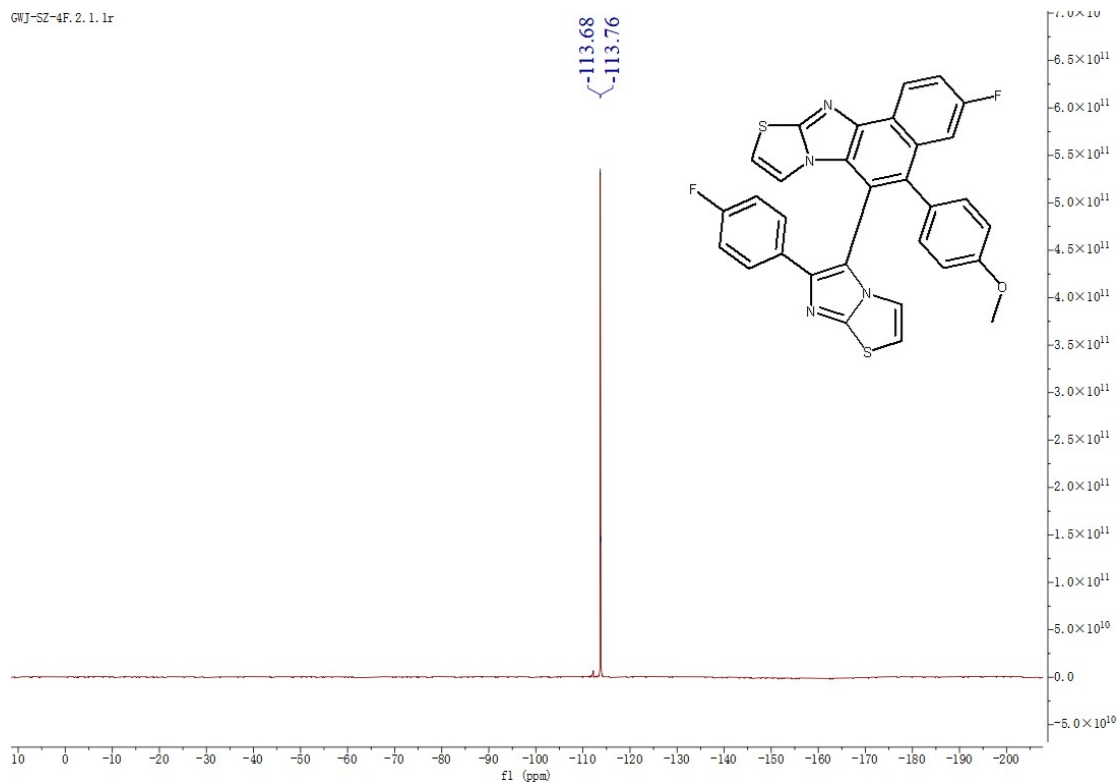

3-chloro-6-(6-(4-chlorophenyl)imidazo[2,1-b]thiazol-5-yl)-5-(4-methoxyphenyl)naphtho[1',2':4,5]imidazo[2,1-b]thiazole (8):

GWJ-SZ-4-Cl. 1. 1. 1r

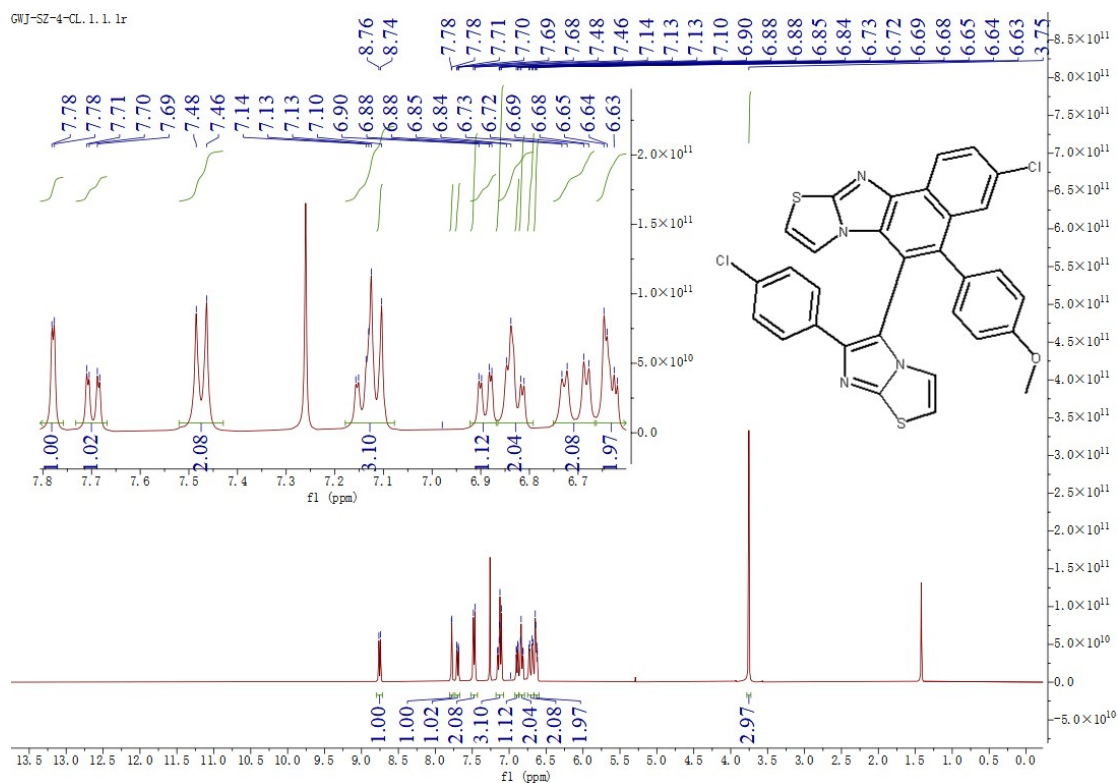

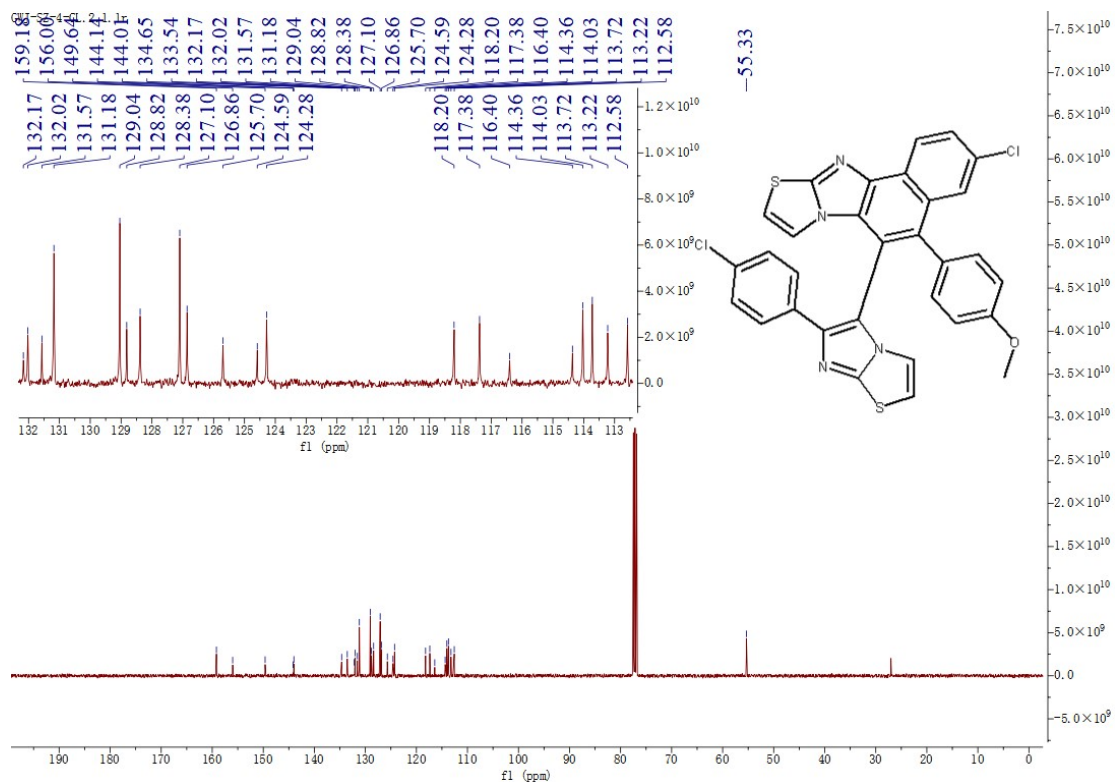

3-bromo-6-(6-(4-bromophenyl)imidazo[2,1-b]thiazol-5-yl)-5-(4-methoxyphenyl)naphtho[1',2':4,5]imidazo[2,1-b]thiazole (9):

GWJ-SZ-4-BR. 1. 1. 1r

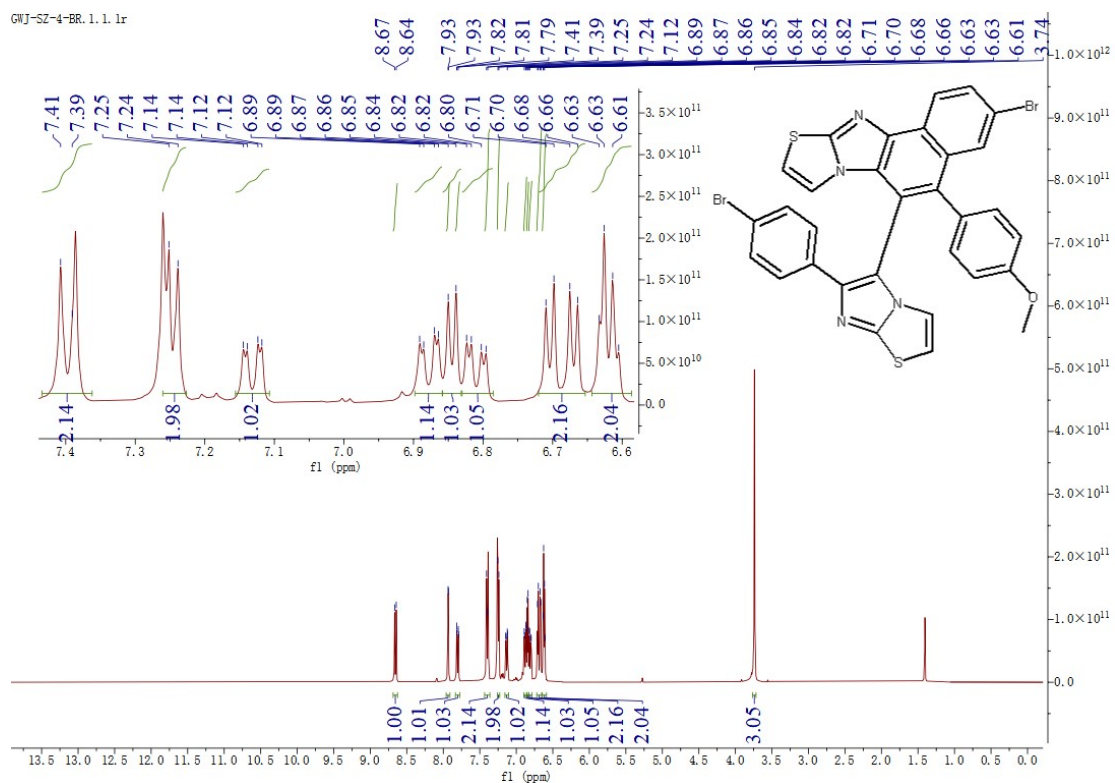

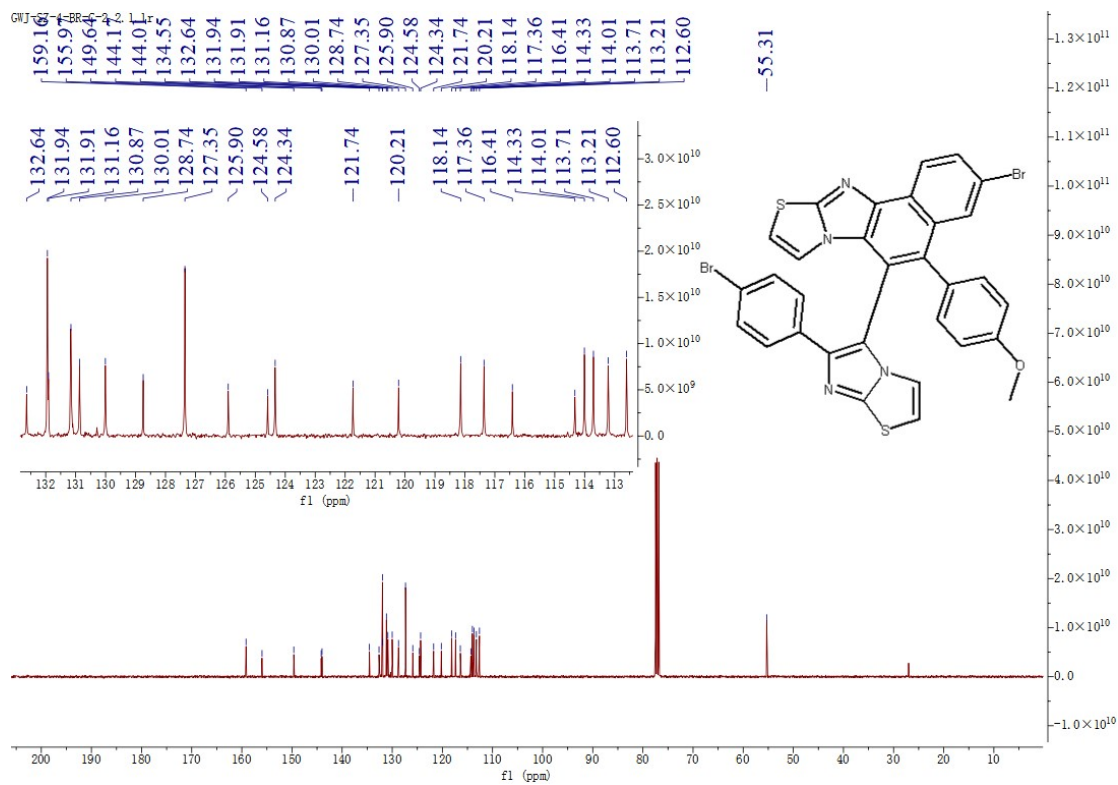

3-iodo-6-(6-(4-iodophenyl)imidazo[2,1-b]thiazol-5-yl)-5-(4-methoxyphenyl)naphtho[1',2':4,5]imidazo[2,1-b]thiazole (10):

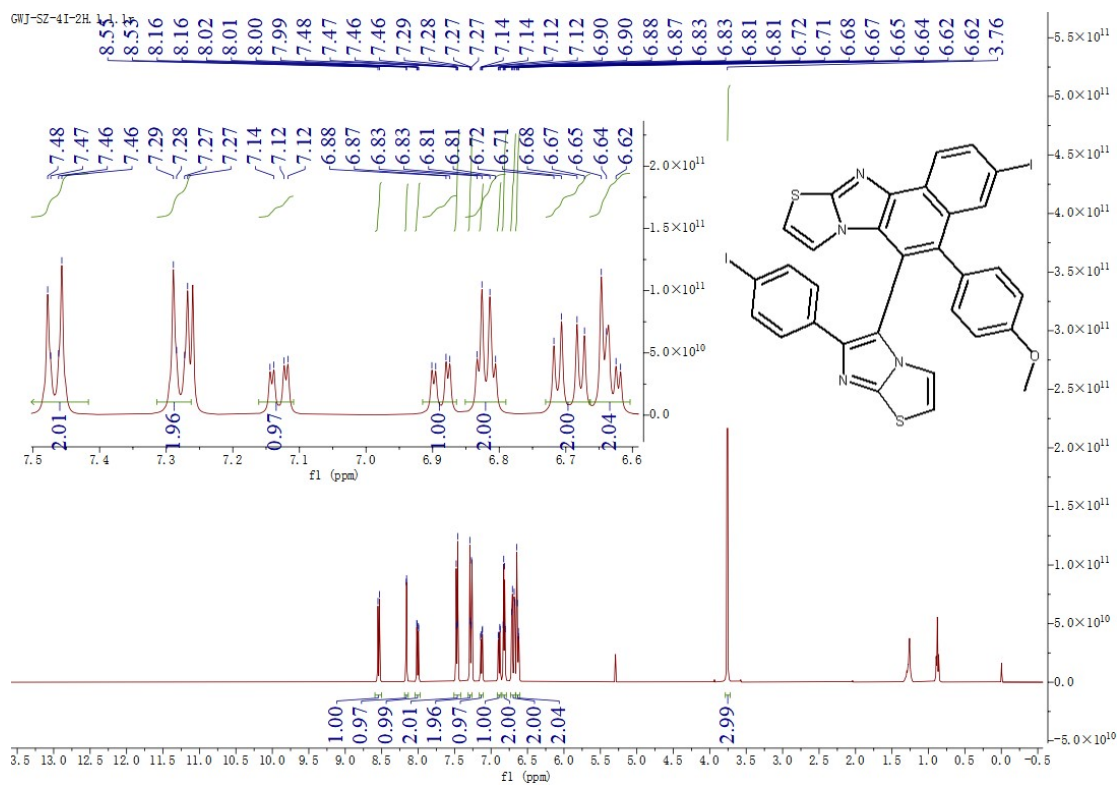



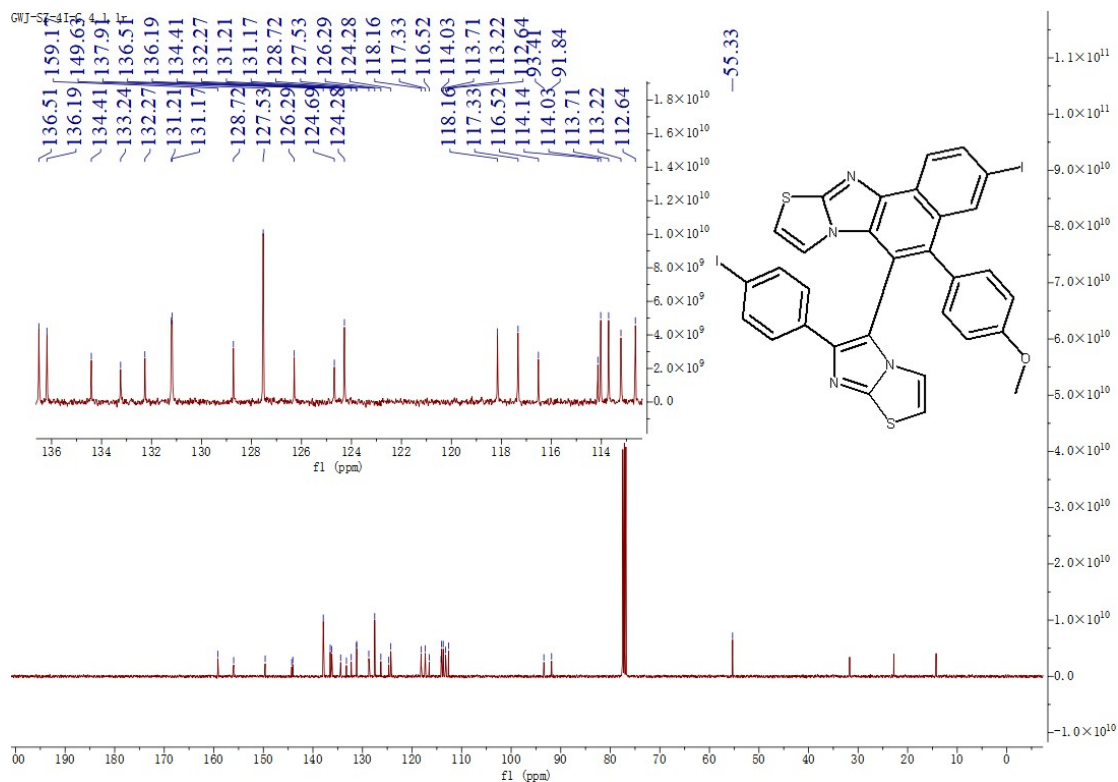

6-(6-([1,1'-biphenyl]-4-yl)imidazo[2,1-*b*]thiazol-5-yl)-5-(4-methoxyphenyl)-3-phenylnaphtho[1',2':4,5]imidazo[2,1-*b*]thiazole (**11**):

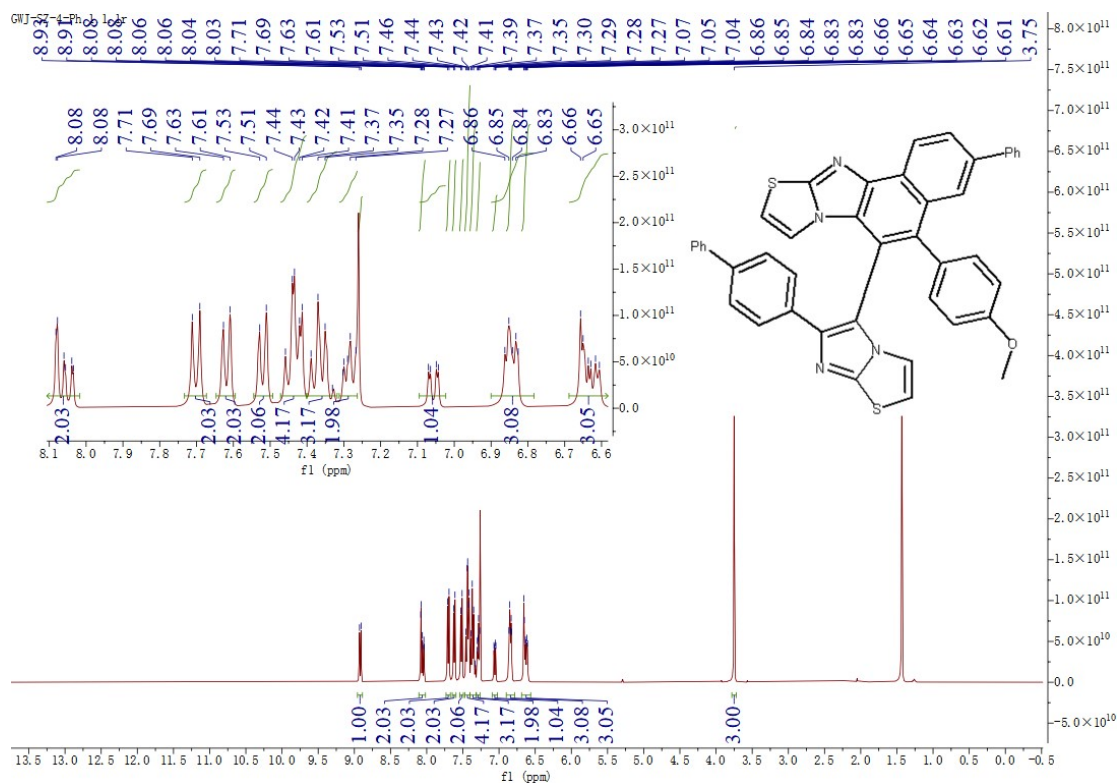

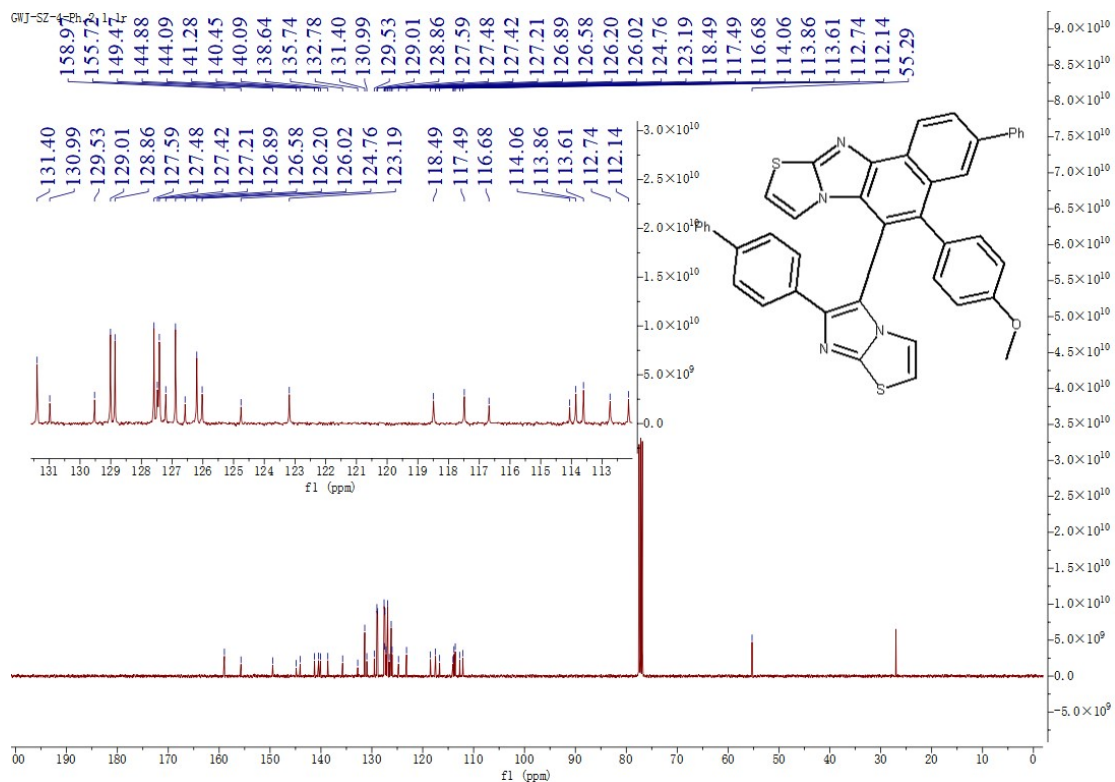

3-methoxy-5-(4-methoxyphenyl)-6-(6-(4-methoxyphenyl)imidazo[2,1-b]thiazol-5-yl)naphtho[1',2':4,5]imidazo[2,1-b]thiazole (12):

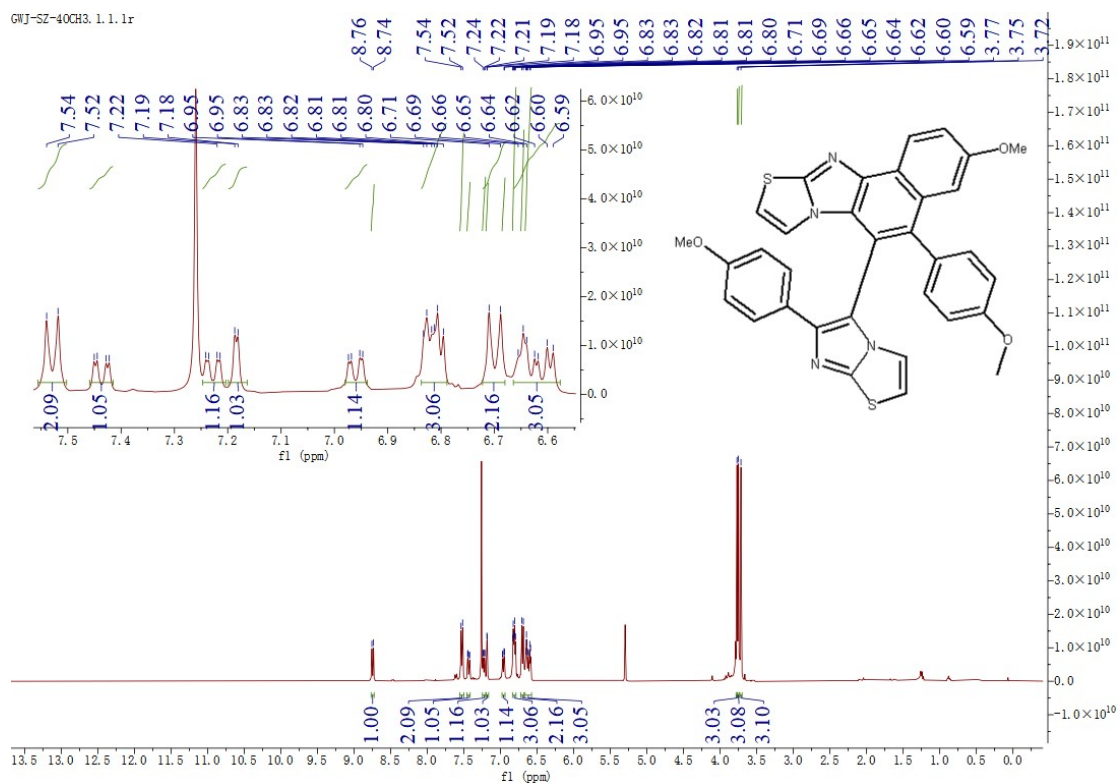

5-(4-methoxyphenyl)-3-(trifluoromethoxy)-6-(6-(4-

(trifluoromethoxy)phenyl)imidazo[2,1-b]thiazol-5-yl)naphtho[1',2':4,5]imidazo[2,1-b]thiazole (**13**):

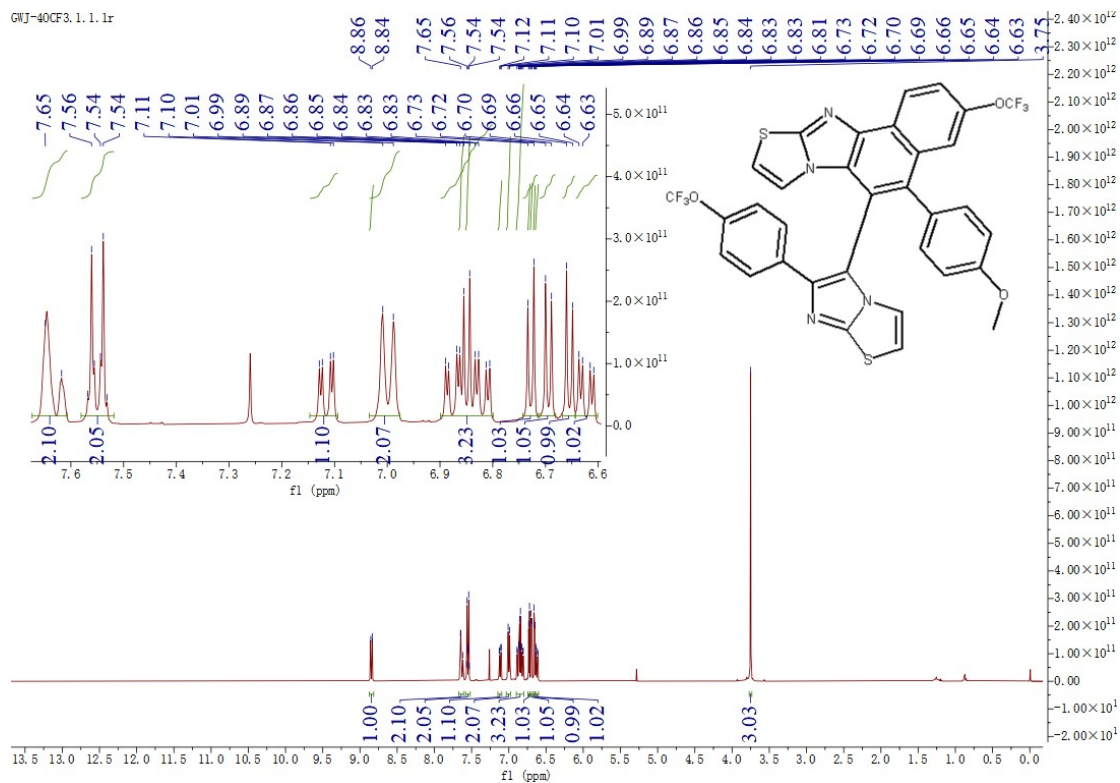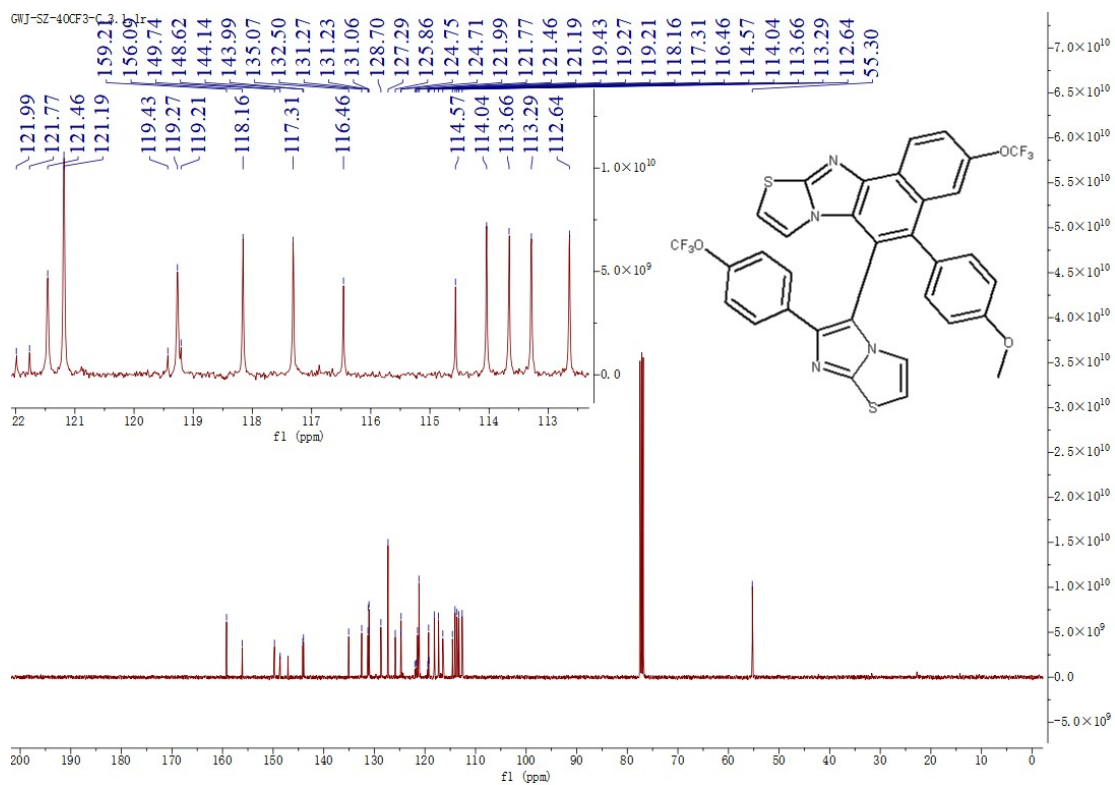

GWJ-40CF3.2.1.1r

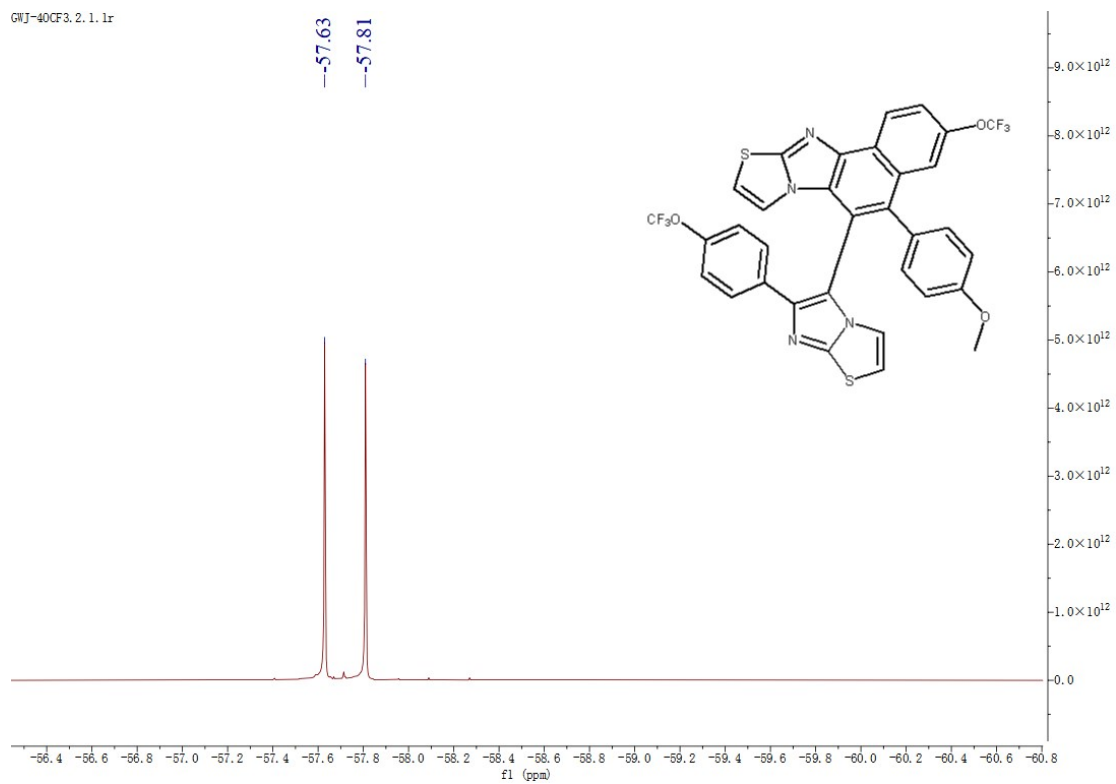

5-(4-methoxyphenyl)-3-(trifluoromethyl)-6-(6-(4-(trifluoromethyl)phenyl)imidazo[2,1-*b*]thiazol-5-yl)naphtho[1',2':4,5]imidazo[2,1-*b*]thiazole (**14**):

GWJ-SZ-4CF3. 1. 1. 1r

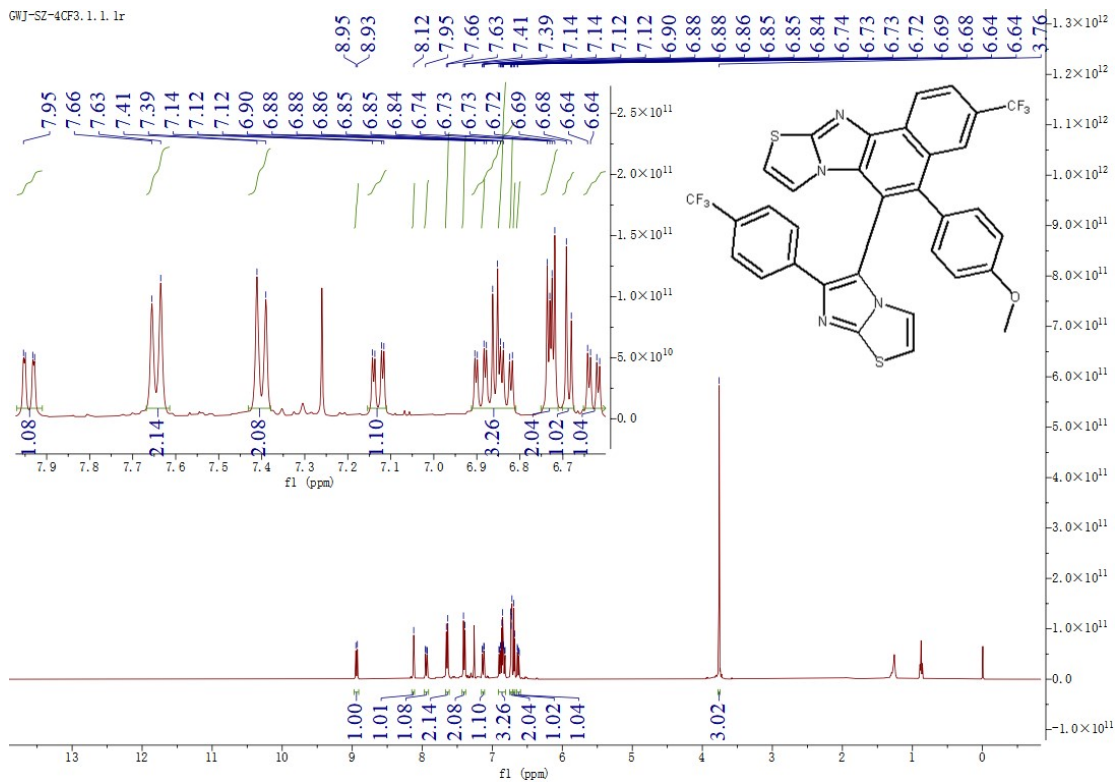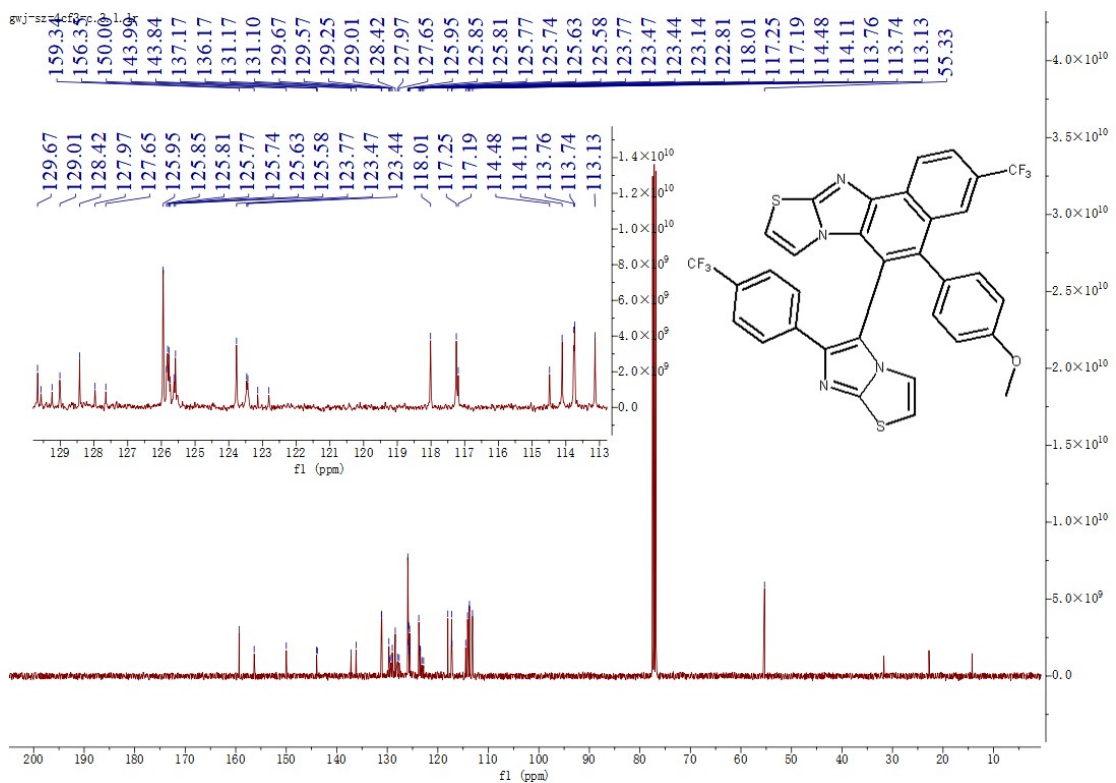

GWJ-SZ-4CF3. 2. 1. 1r

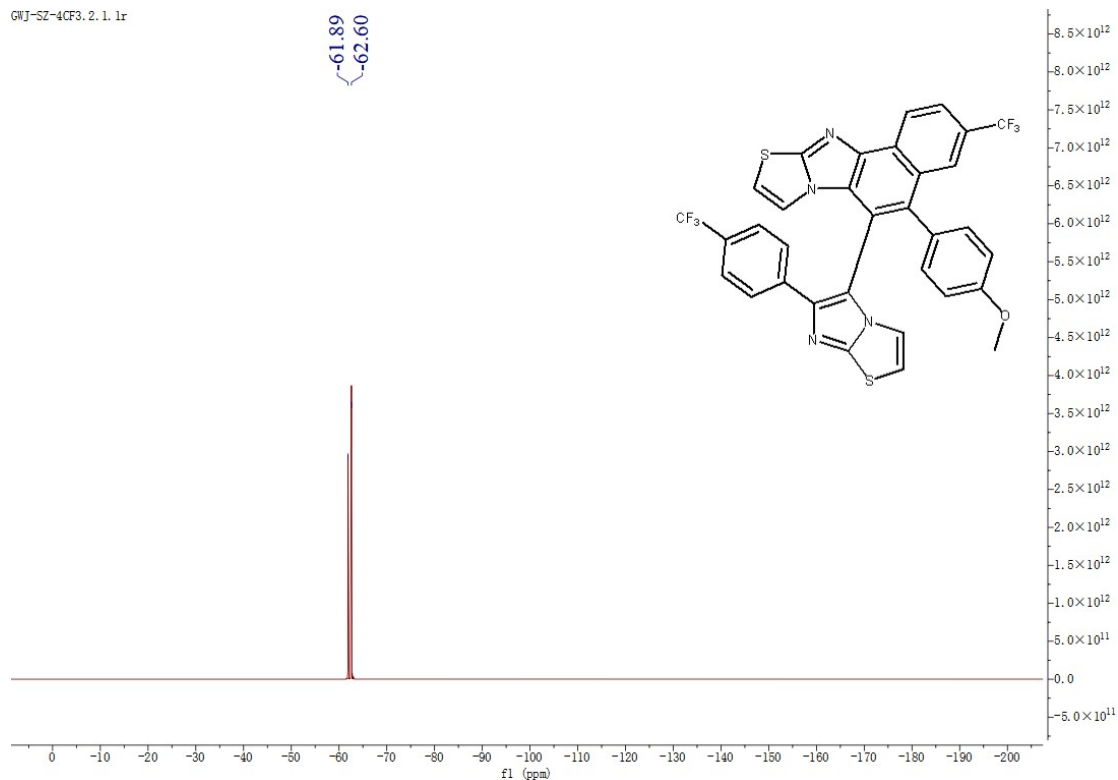

Methyl 6-(6-(4-(methoxycarbonyl)phenyl)imidazo[2,1-*b*]thiazol-5-yl)-5-(4-methoxyphenyl)naphtho[1,2':4,5]imidazo[2,1-*b*]thiazole-3-carboxylate (**15**):

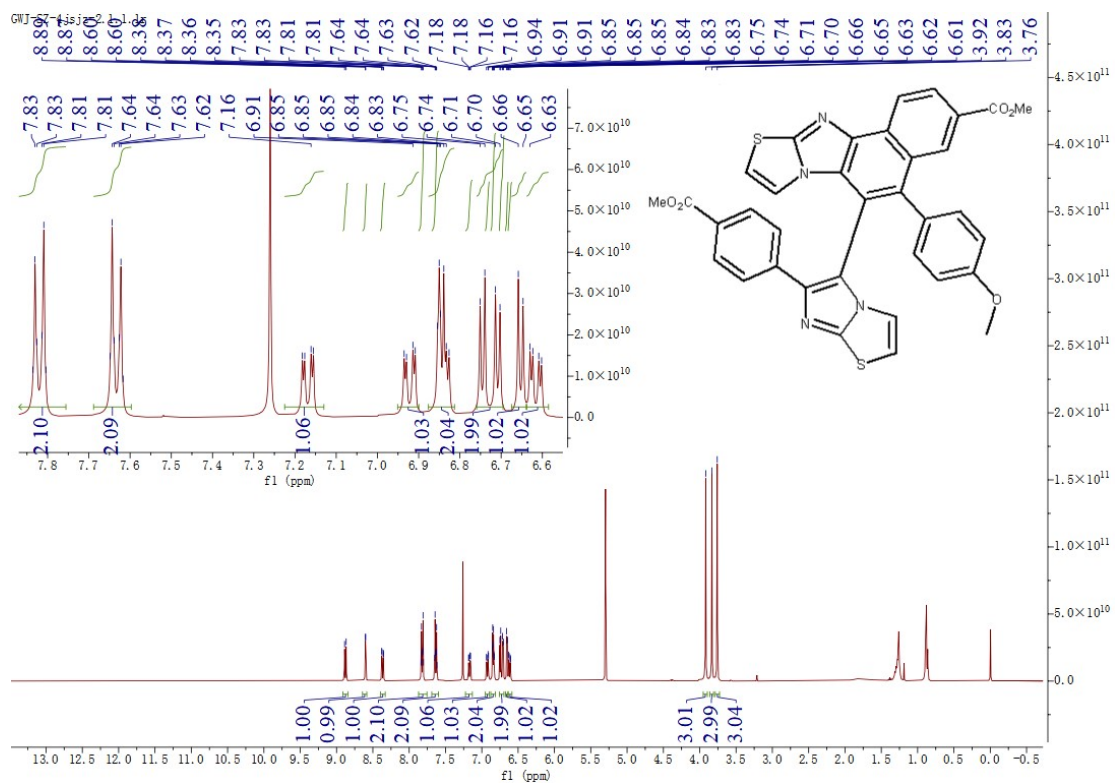

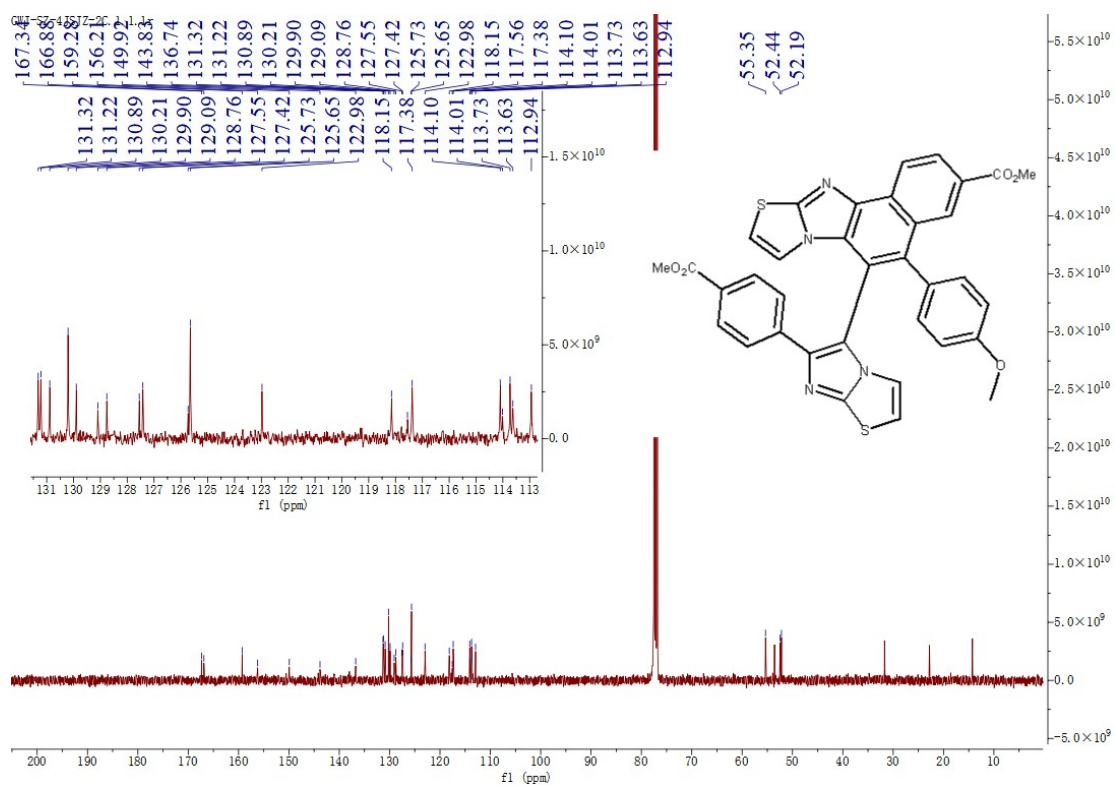

6-(6-(4-cyanophenyl)imidazo[2,1-*b*]thiazol-5-yl)-5-(4-methoxyphenyl)naphtho[1,2':4,5]imidazo[2,1-*b*]thiazole-3-carbonitrile (**16**):

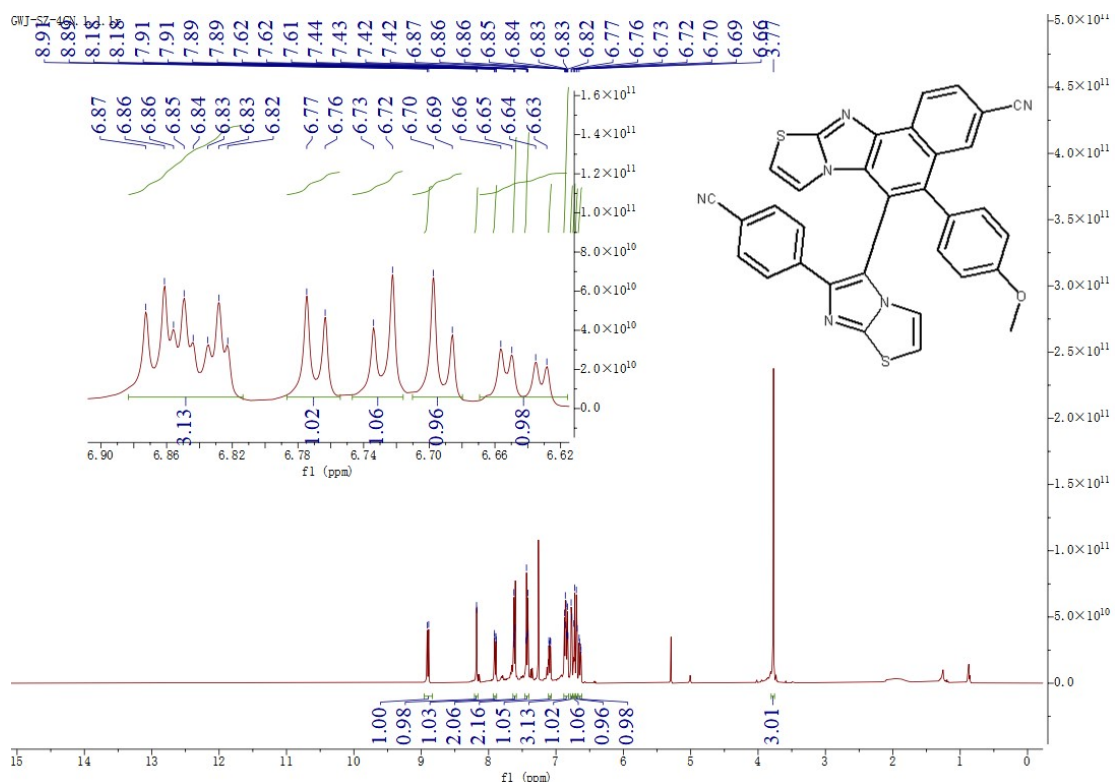

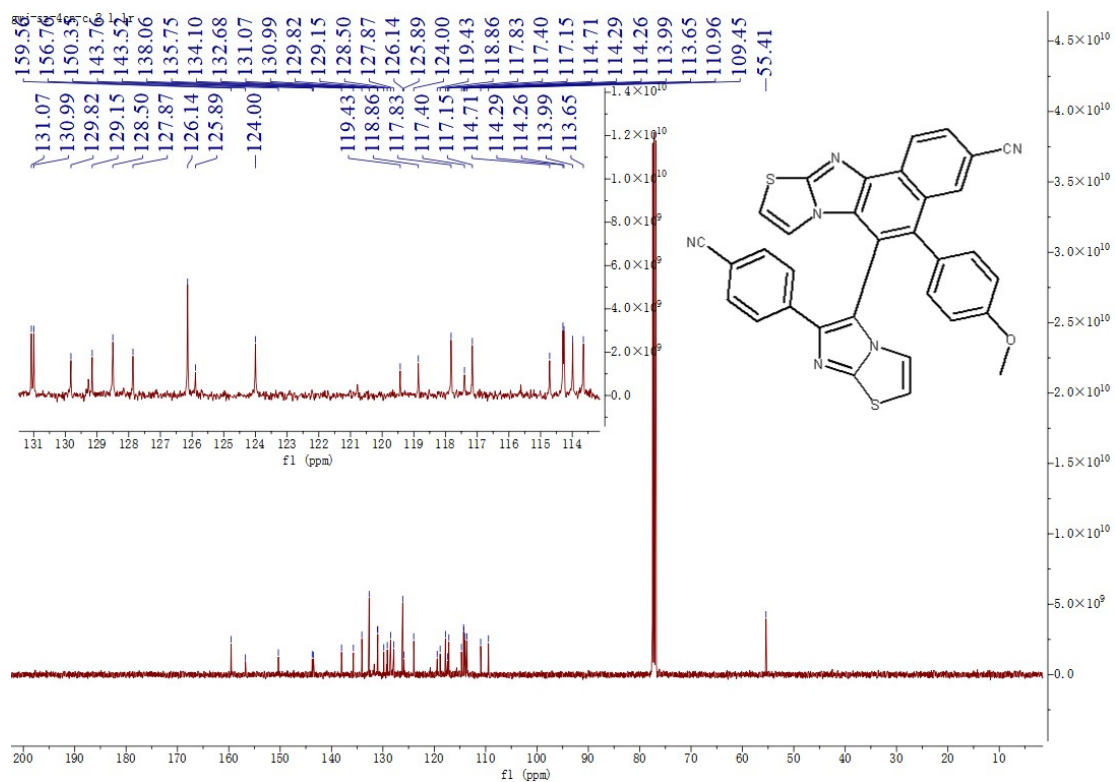

5-(4-methoxyphenyl)-1-methyl-6-(6-(*o*-tolyl)imidazo[2,1-*b*]thiazol-5-yl)naphtho[1,2':4,5]imidazo[2,1-*b*]thiazole (17):

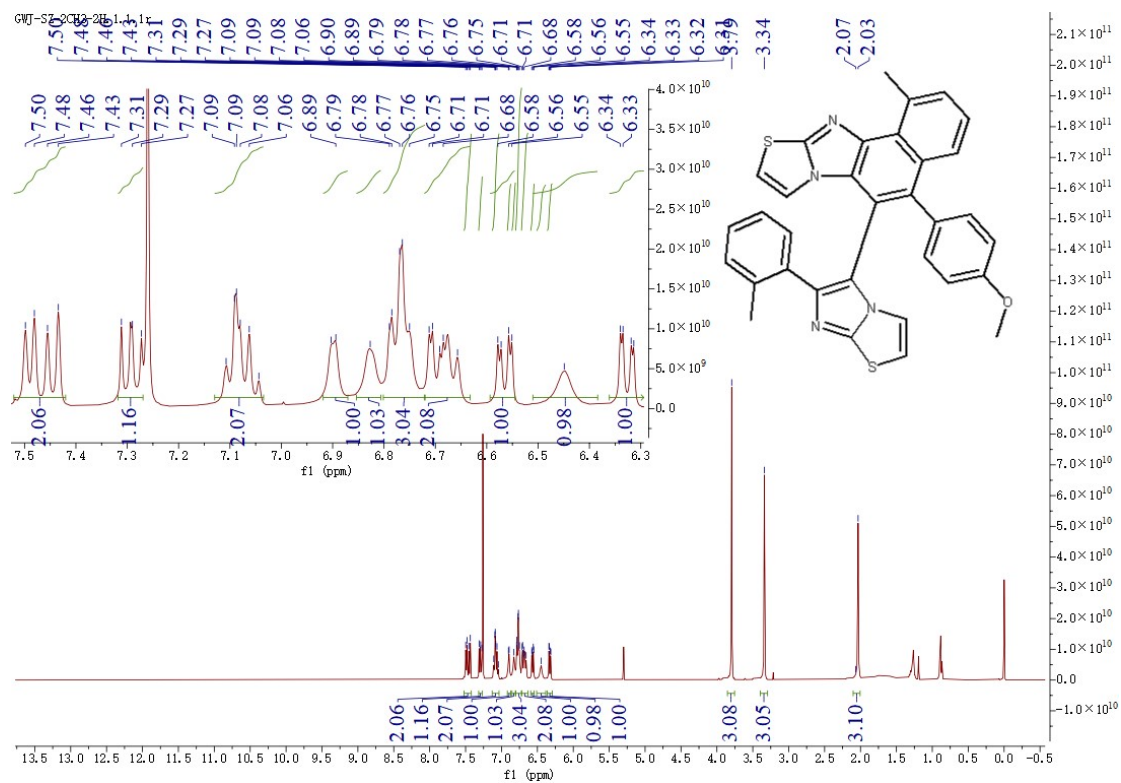



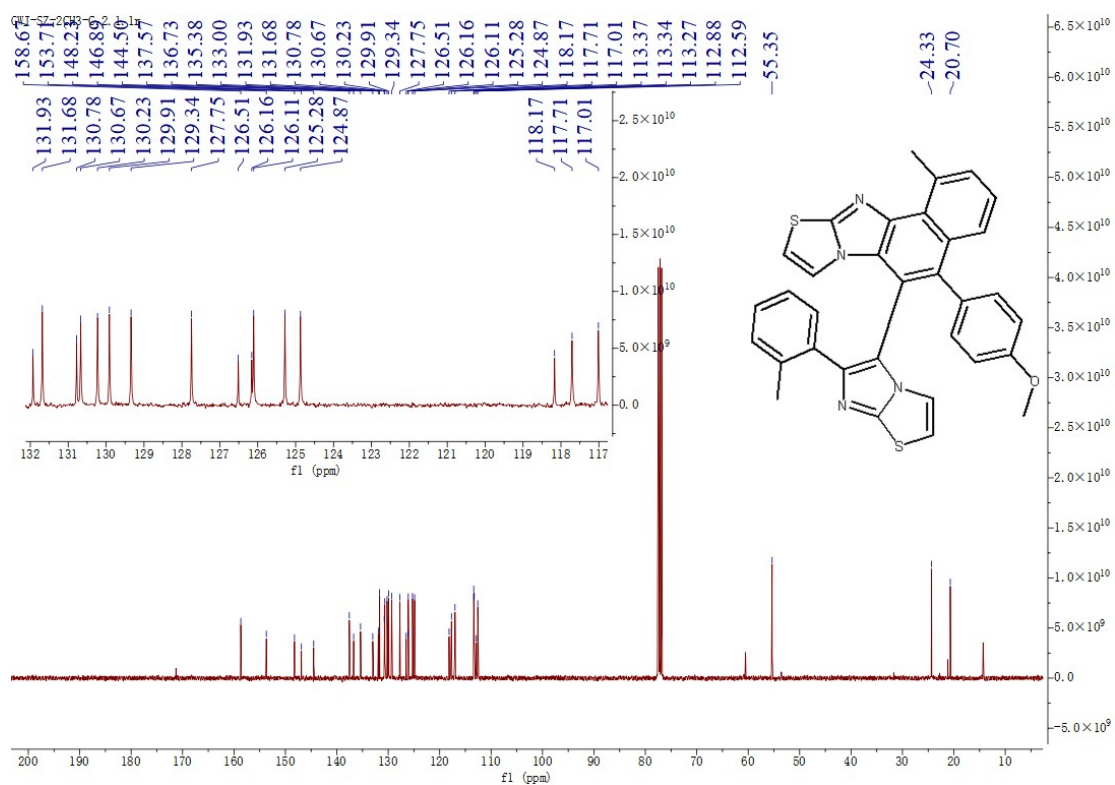

1-fluoro-6-(6-(2-fluorophenyl)imidazo[2,1-*b*]thiazol-5-yl)-5-(4-methoxyphenyl)naphtho[1',2':4,5]imidazo[2,1-*b*]thiazole (**18**):

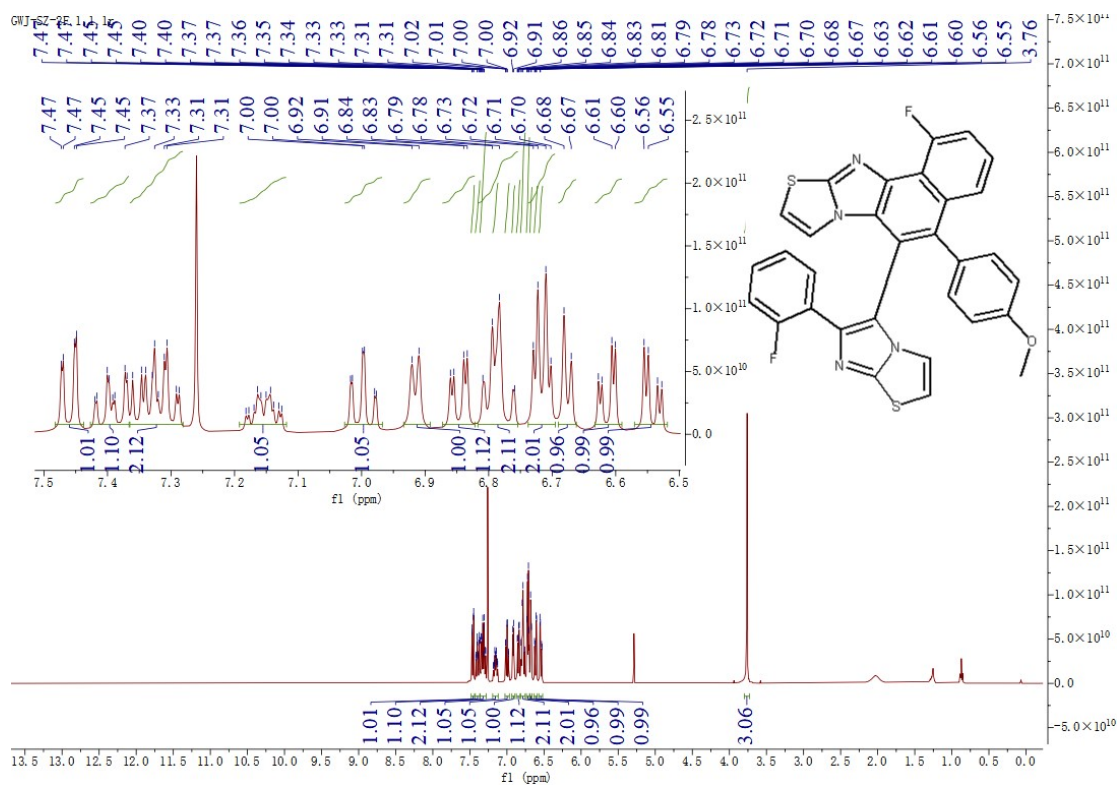

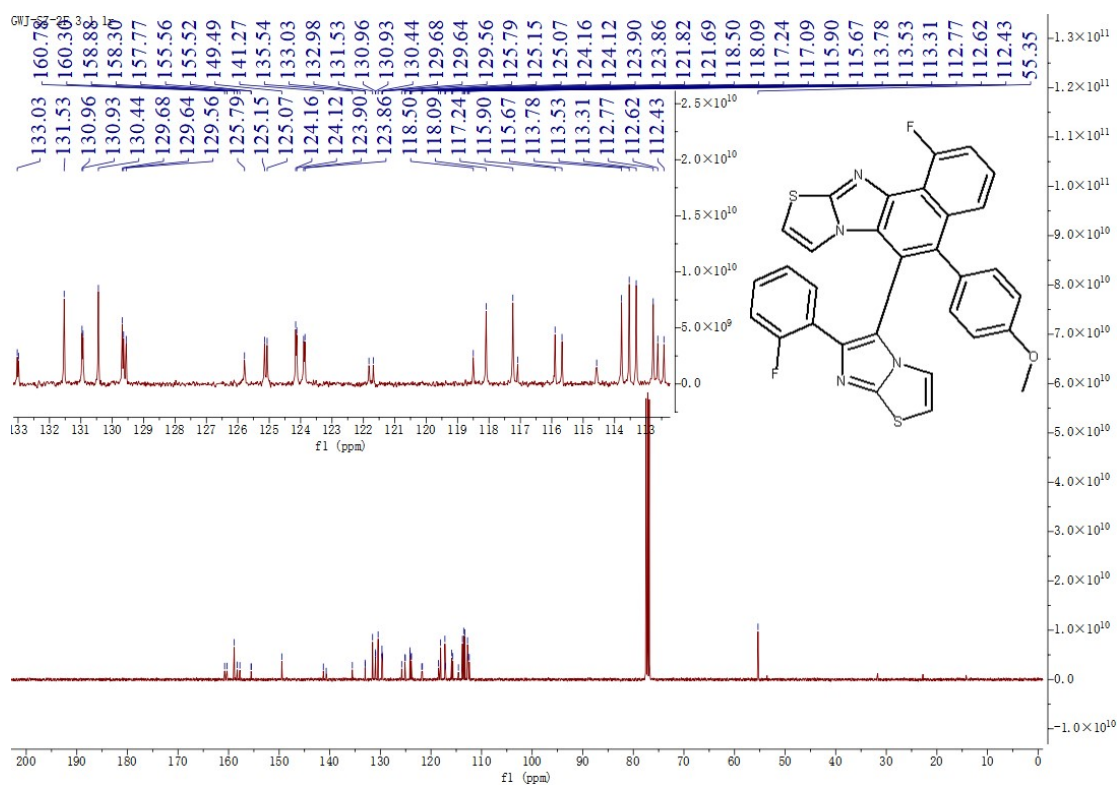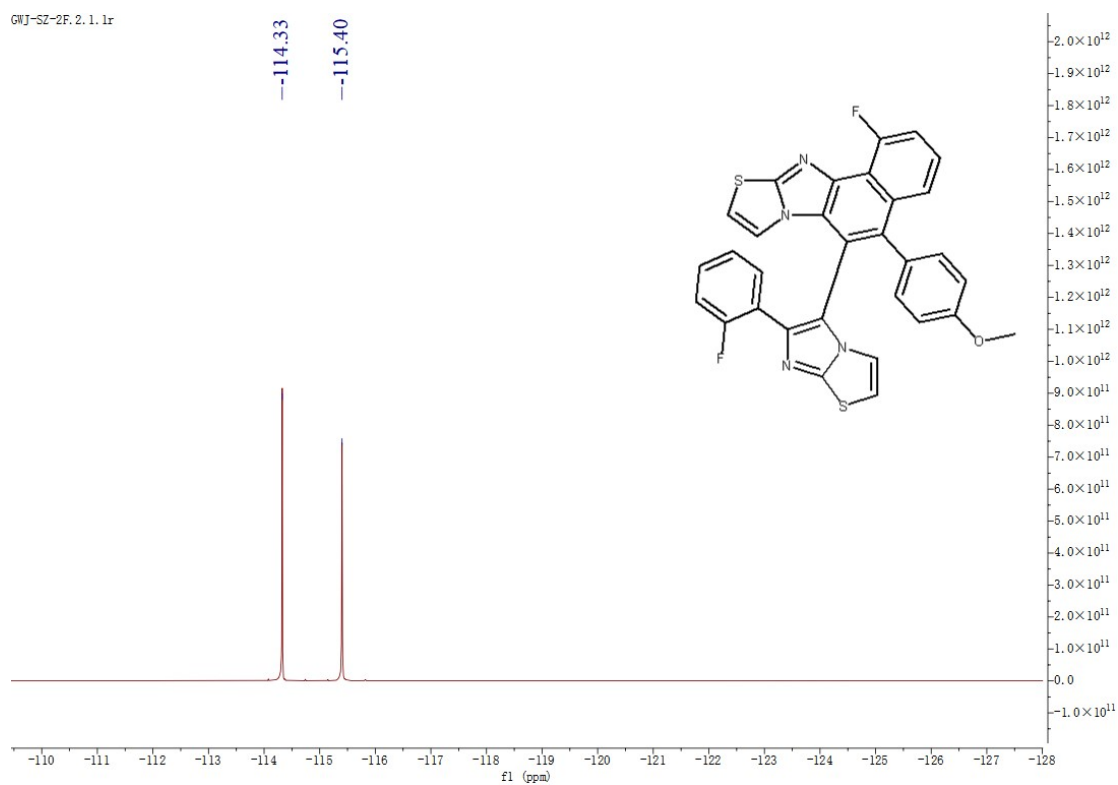

1-chloro-6-(6-(2-chlorophenyl)imidazo[2,1-*b*]thiazol-5-yl)-5-(4-



dimethylnaphtho[1',2':4,5]imidazo[2,1-*b*]thiazole (**20**):

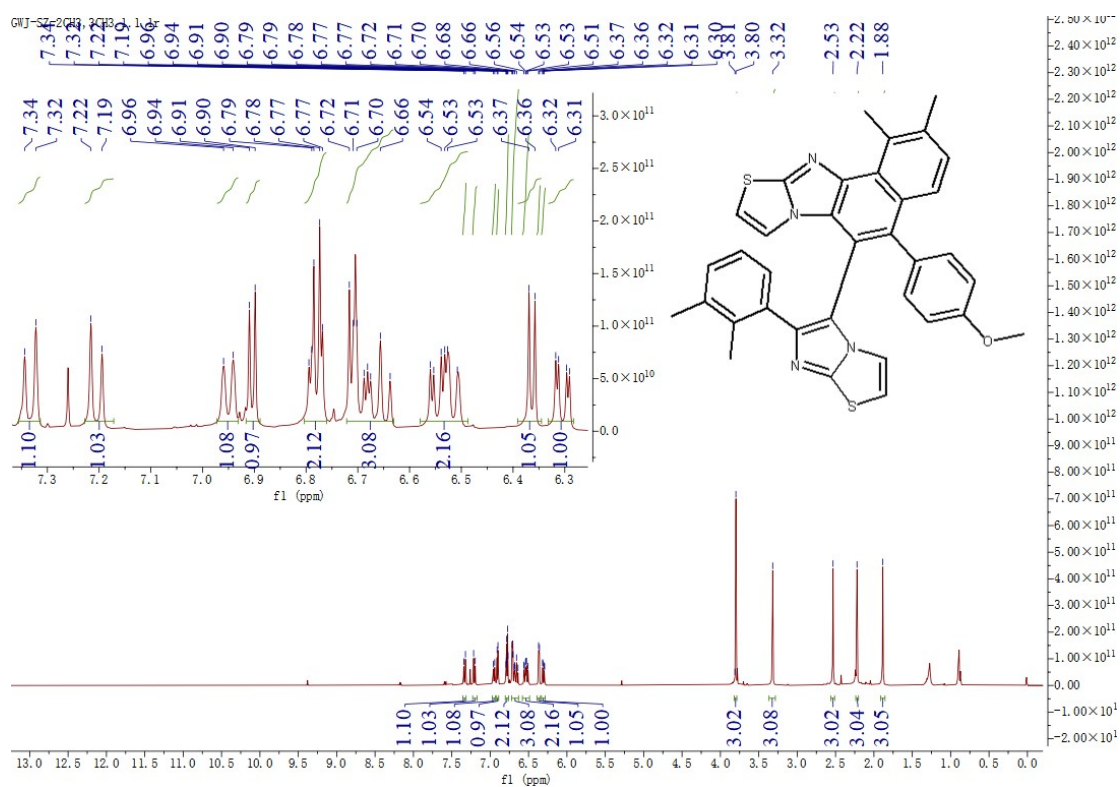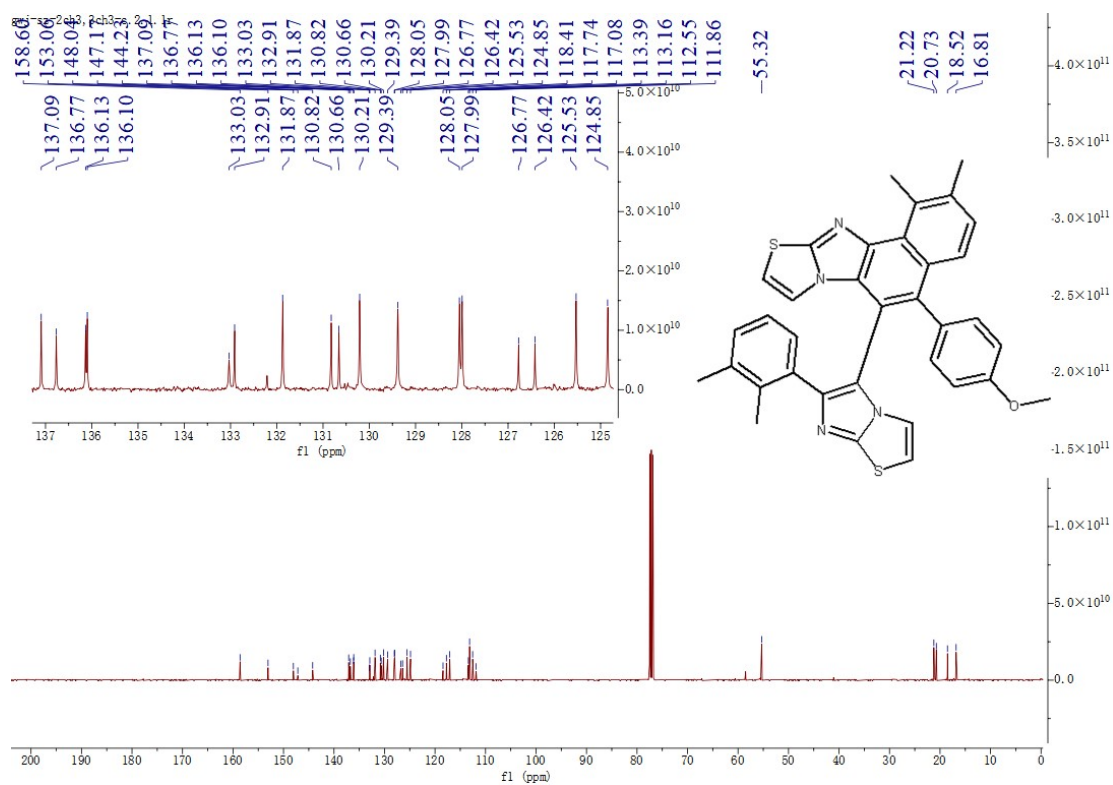

4-(4-methoxyphenyl)-5-(6-(thiophen-2-yl)imidazo[2,1-*b*]thiazol-5-

yl)thieno[3'',2'':5',6']benzo[1',2':4,5]imidazo[2,1-*b*]thiazole (**21**):

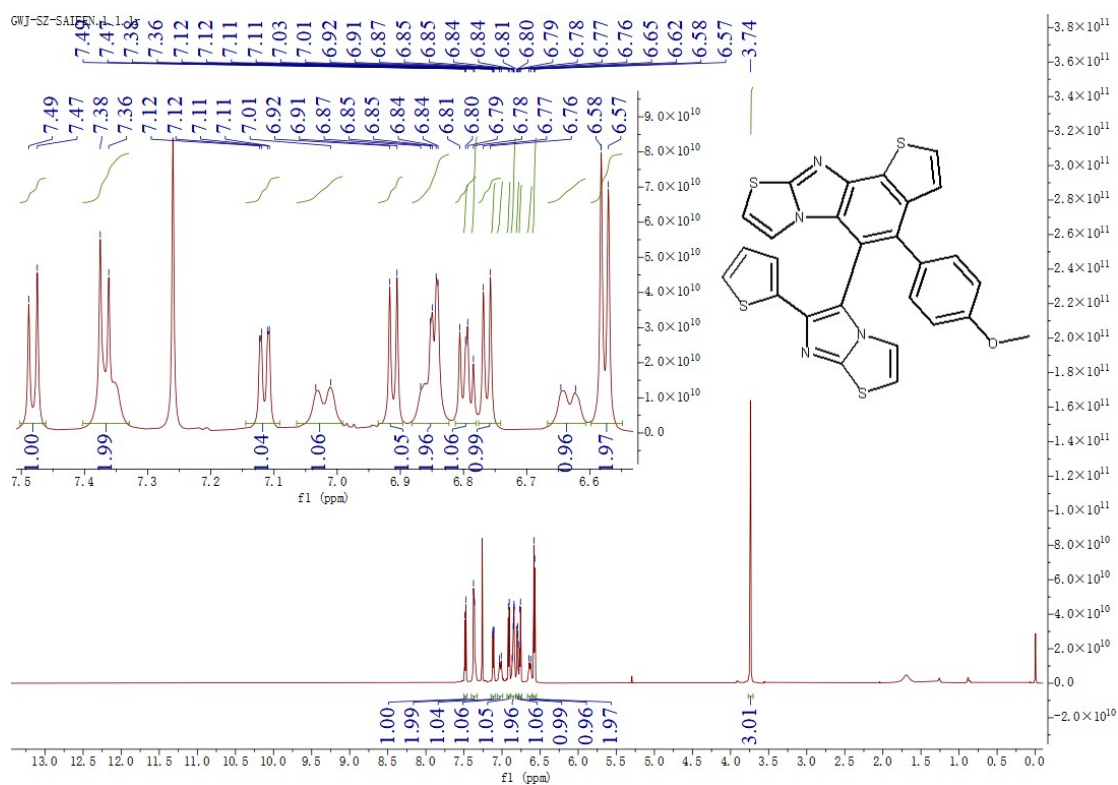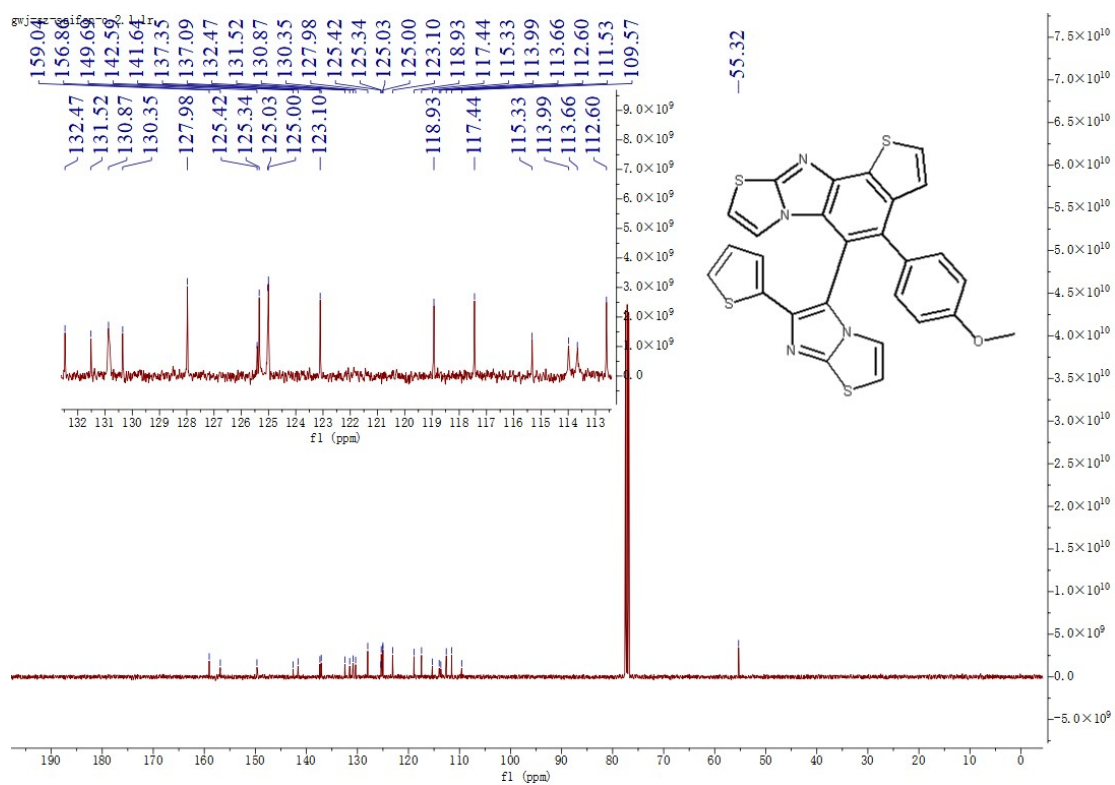

5-phenyl-6-(6-phenylimidazo[2,1-*b*]thiazol-5-yl)naphtho[1',2':4,5]imidazo[2,1-

b]thiazole (22):

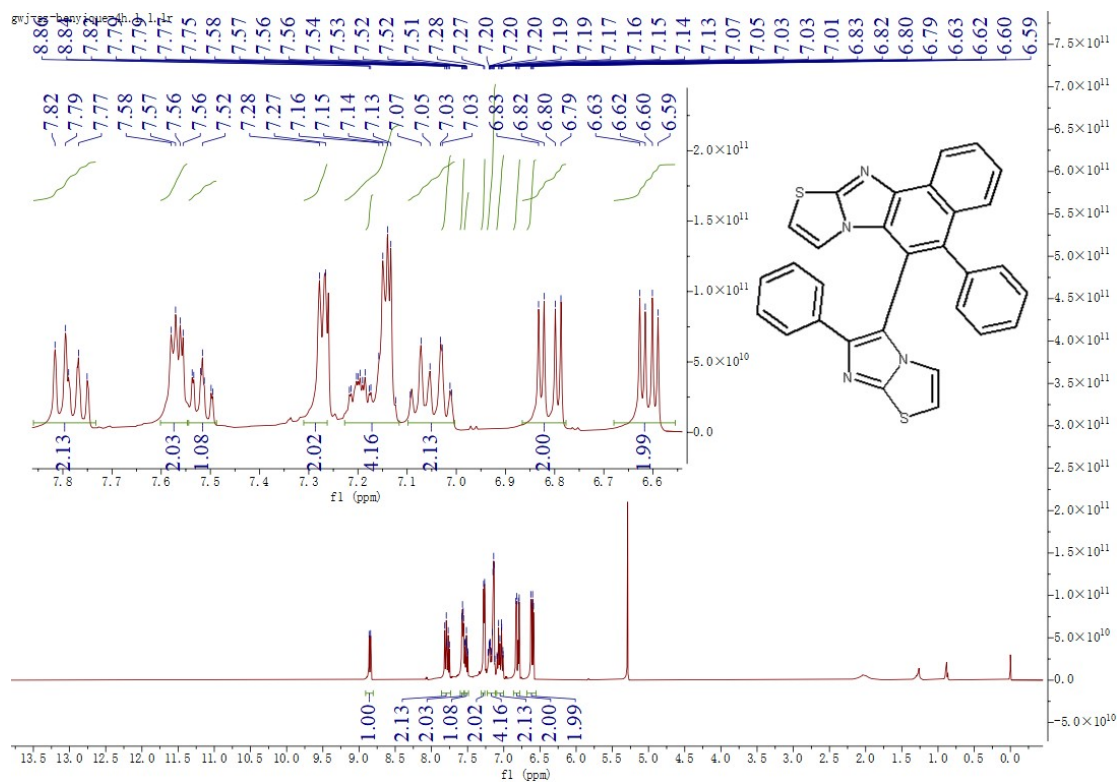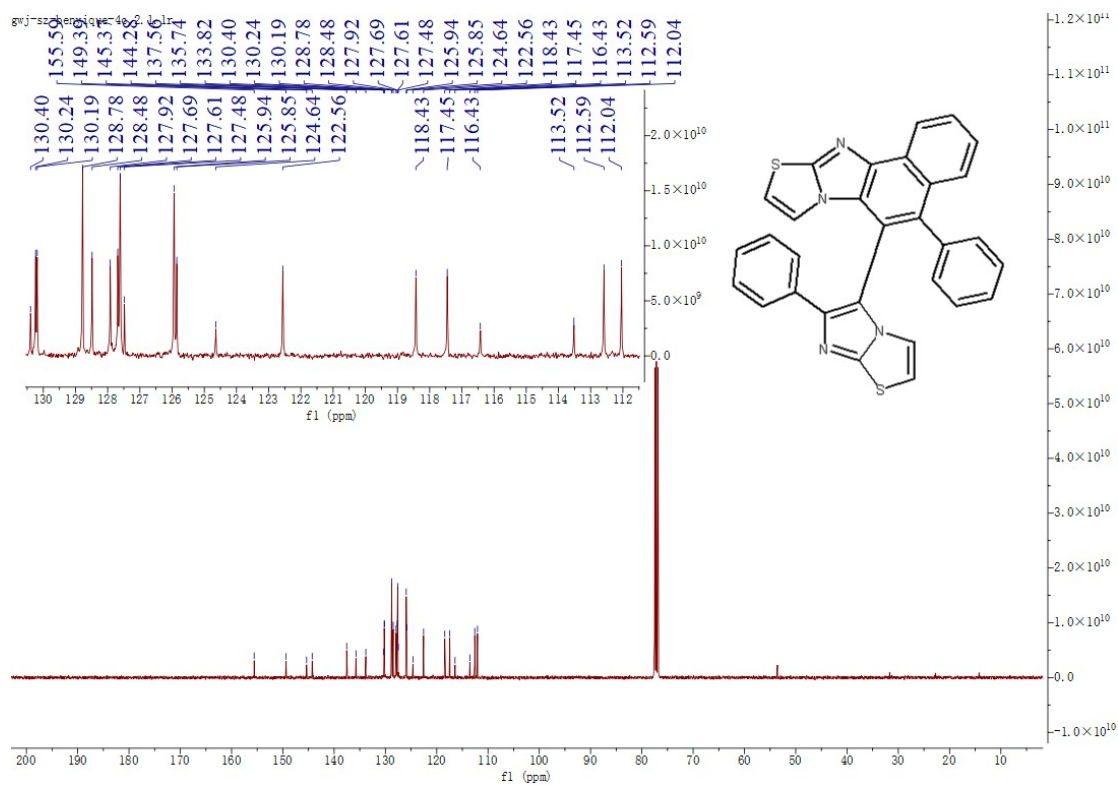

6-(6-phenylimidazo[2,1-*b*]thiazol-5-yl)-5-(*p*-tolyl)naphtho[1',2':4,5]imidazo[2,1-



yl)naphtho[1',2':4,5]imidazo[2,1-*b*]thiazole (24):

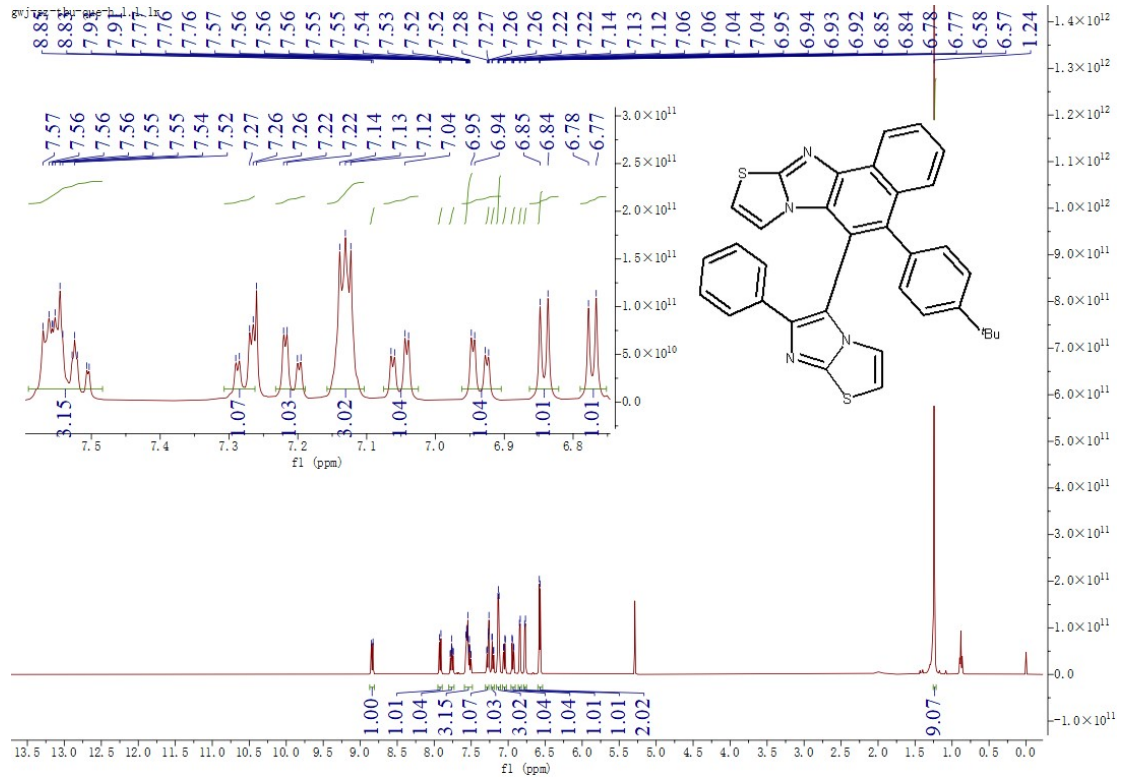





5-(4-fluorophenyl)-6-(6-phenylimidazo[2,1-b]thiazol-5-yl)naphtho[1',2':4,5]imidazo[2,1-b]thiazole (**26**):

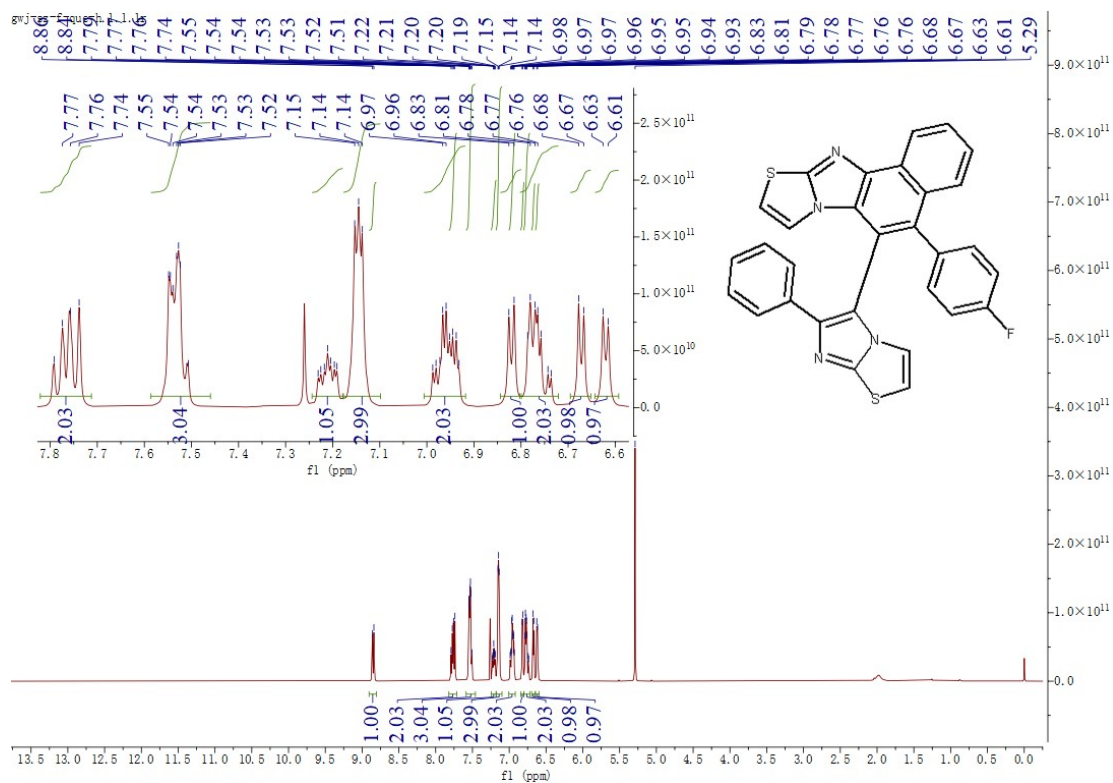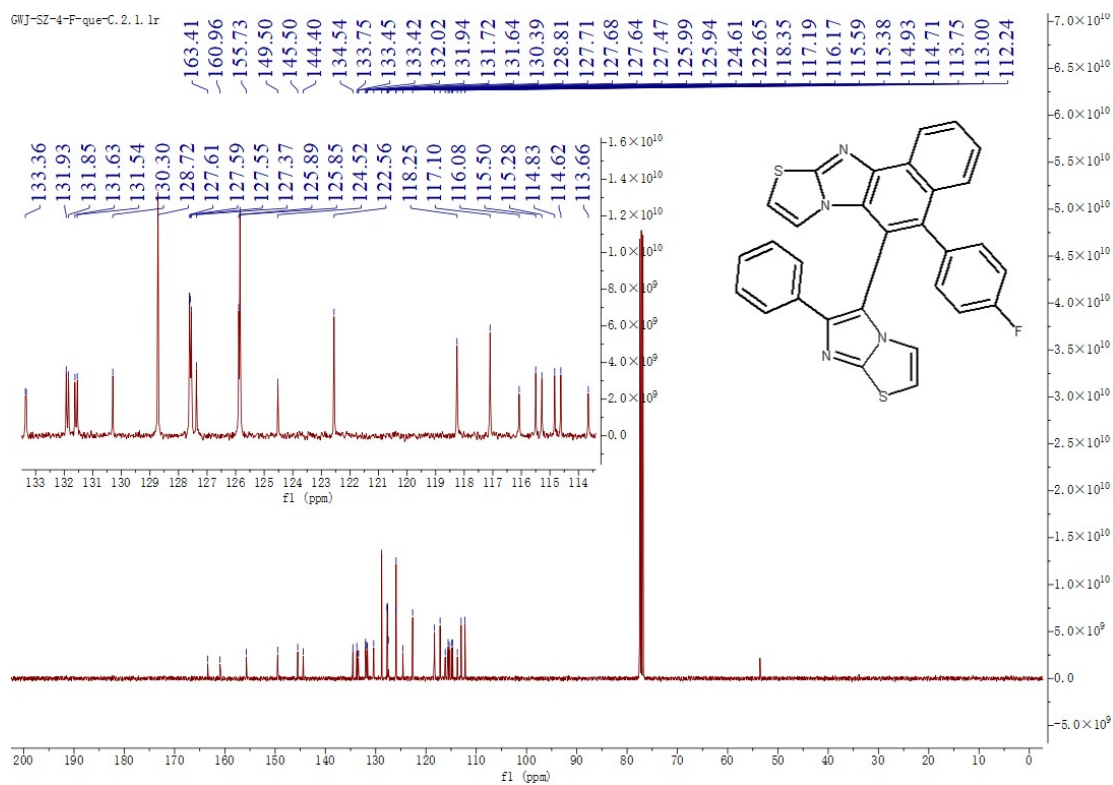



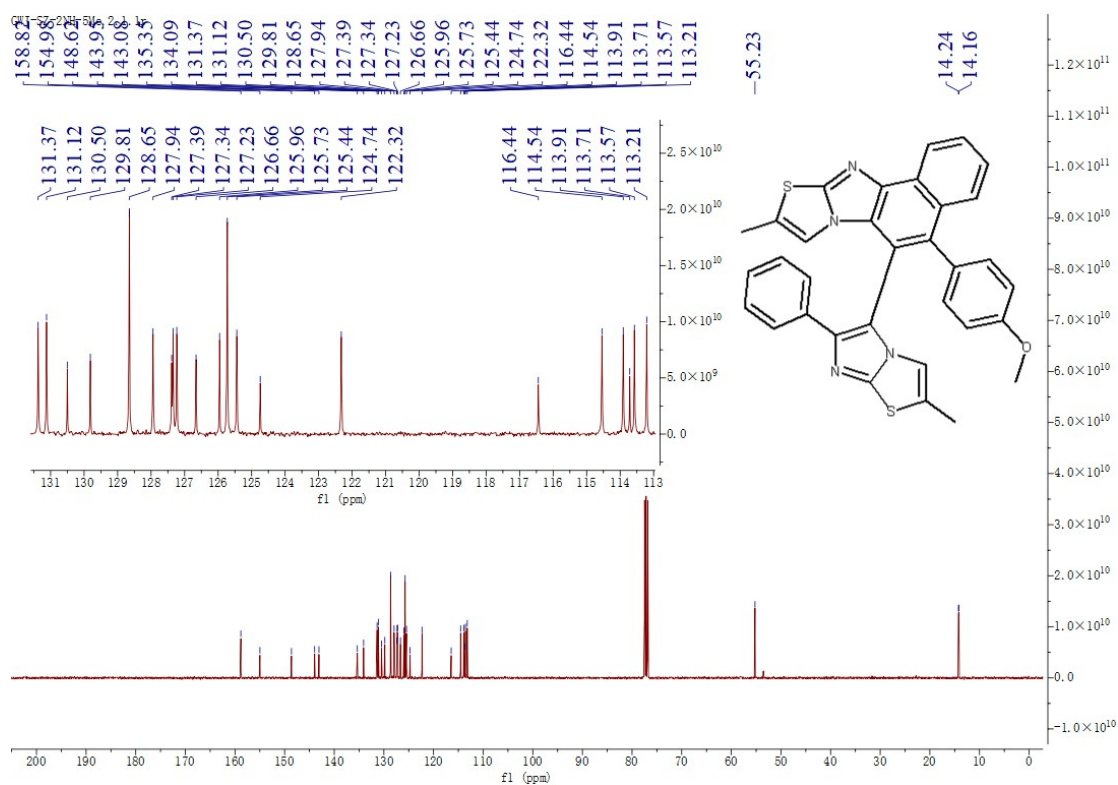

5-(4-methoxyphenyl)-6-(2-phenylimidazo[1,2-*a*]pyridin-3-yl)naphtho[1',2':4,5]imidazo[1,2-*a*]pyridine (**28**):

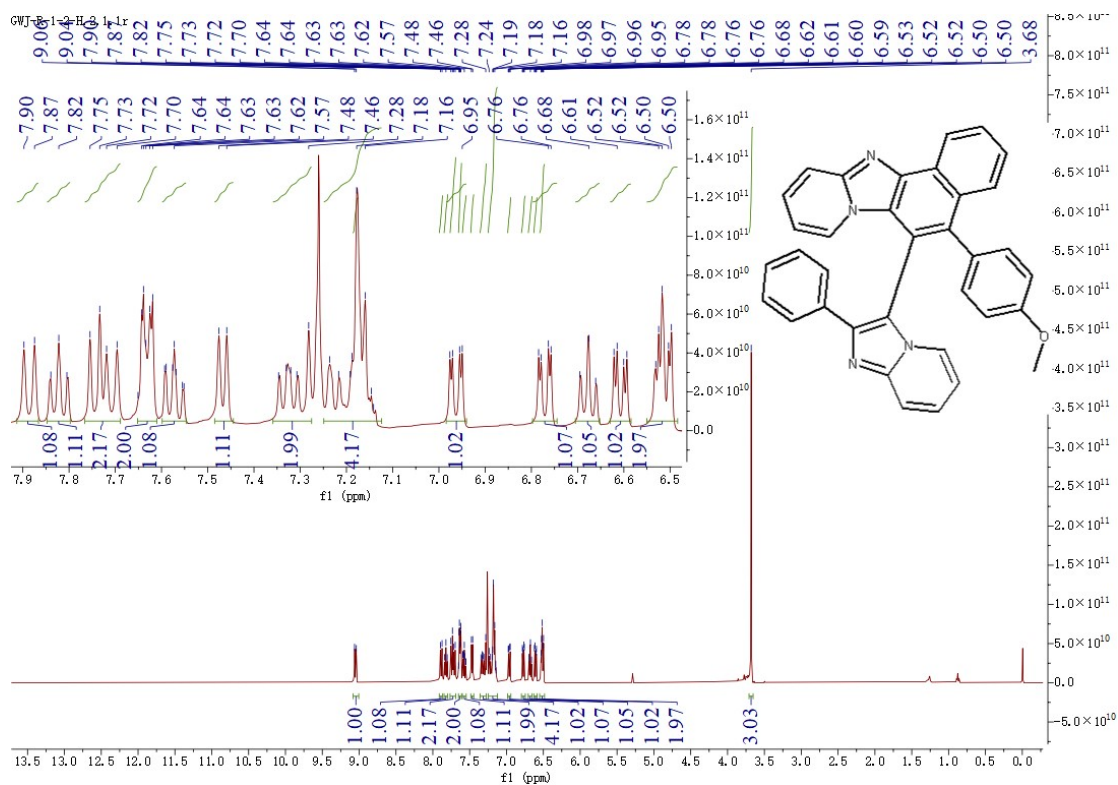



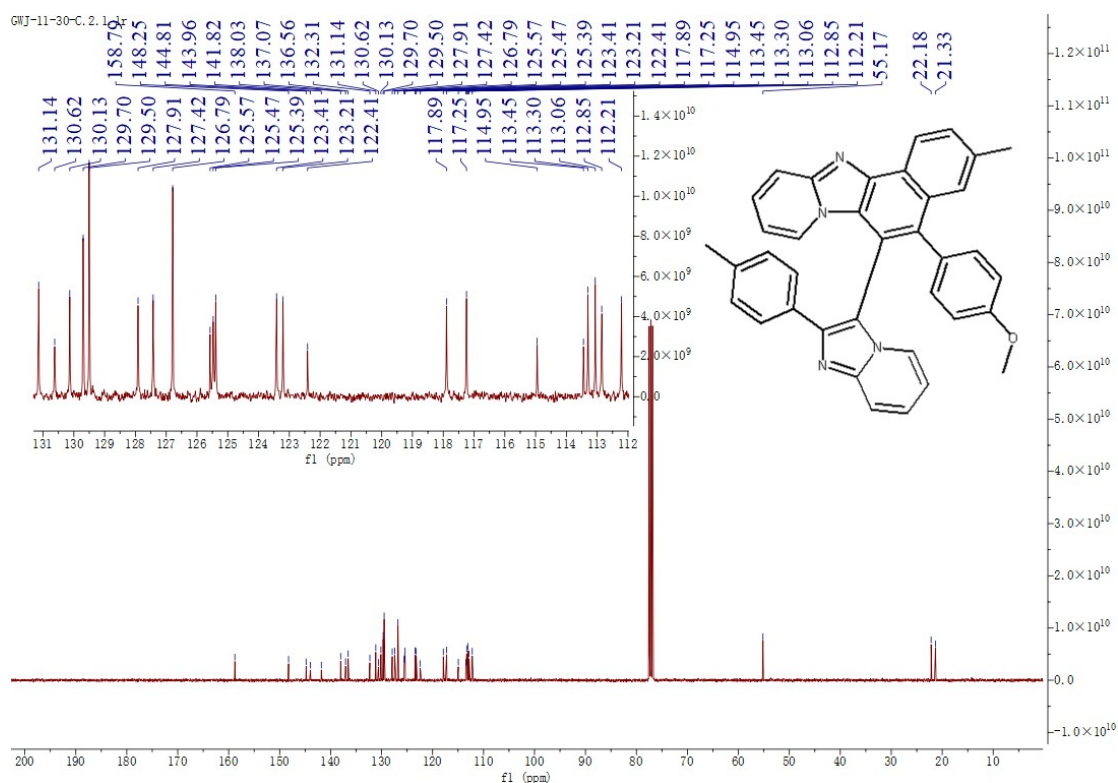

3-ethyl-6-(2-(4-ethylphenyl)imidazo[1,2-a]pyridin-3-yl)-5-(4-methoxyphenyl)naphtho[1',2':4,5]imidazo[1,2-a]pyridine (30):

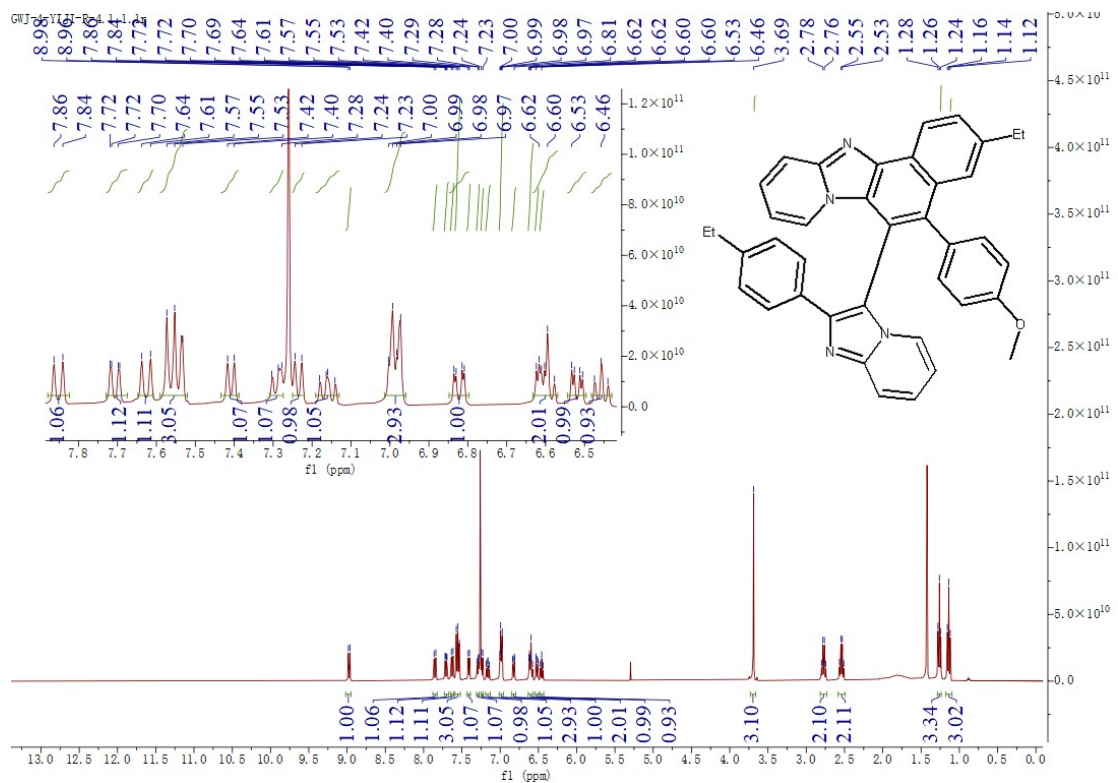

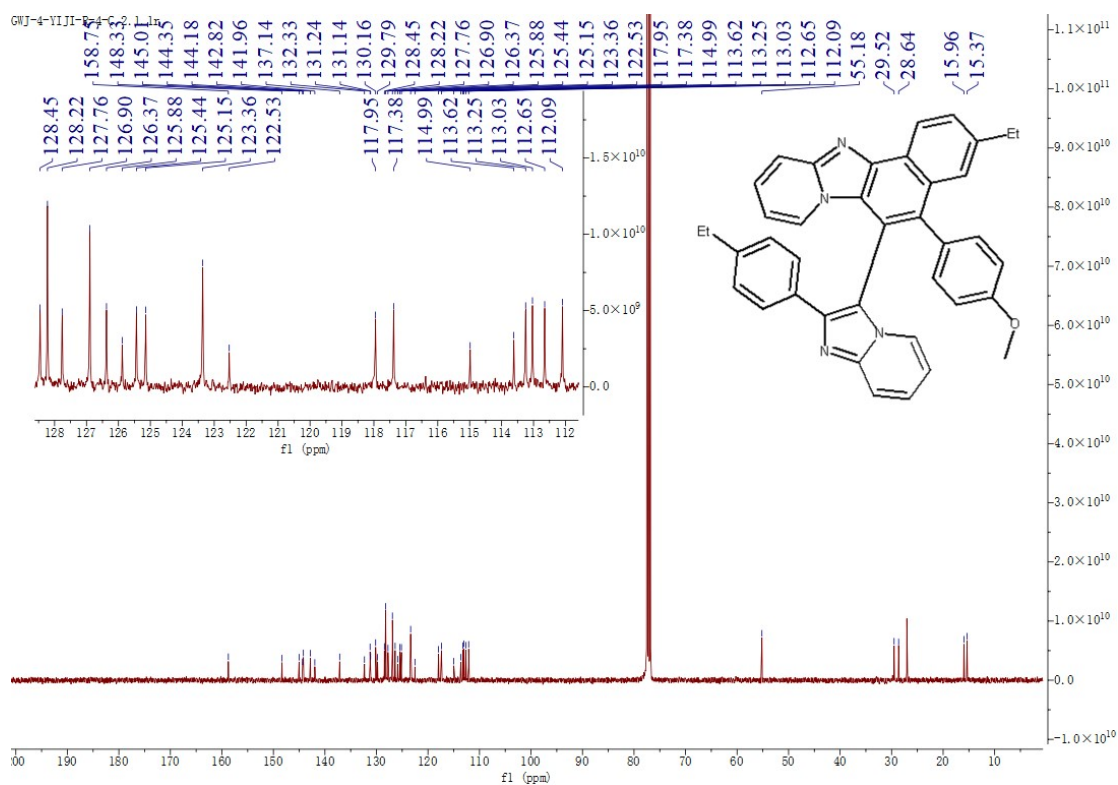

6-(2-([1,1'-biphenyl]-4-yl)imidazo[1,2-a]pyridin-3-yl)-5-(4-methoxyphenyl)-3-phenylnaphtho[1',2':4,5]imidazo[1,2-a]pyridine (31):

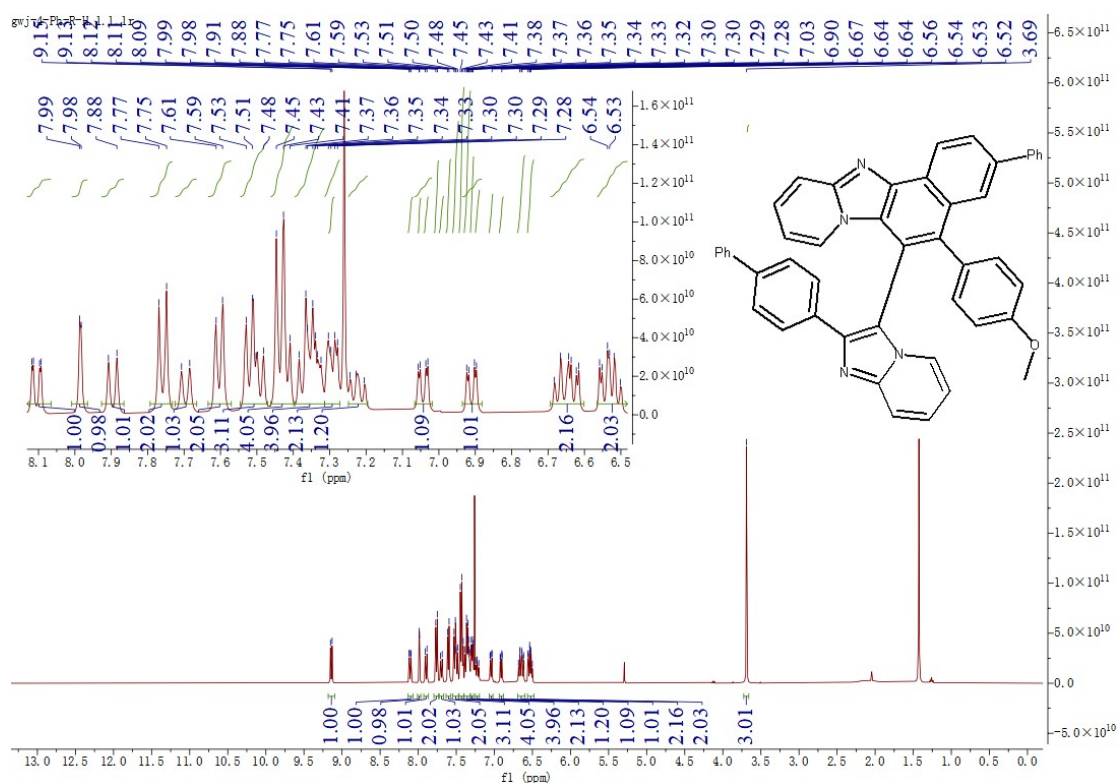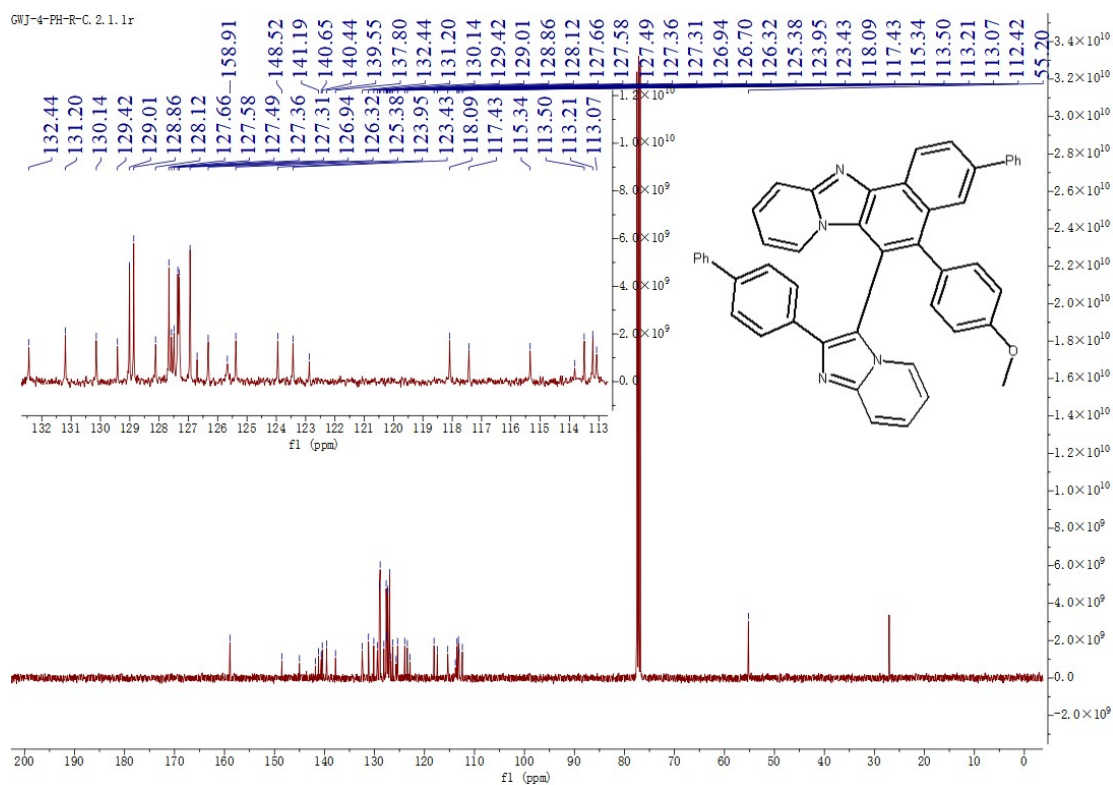

3-fluoro-6-(2-(4-fluorophenyl)imidazo[1,2-*a*]pyridin-3-yl)-5-(4-methoxyphenyl)naphtho[1',2':4,5]imidazo[1,2-*a*]pyridine (**32**):



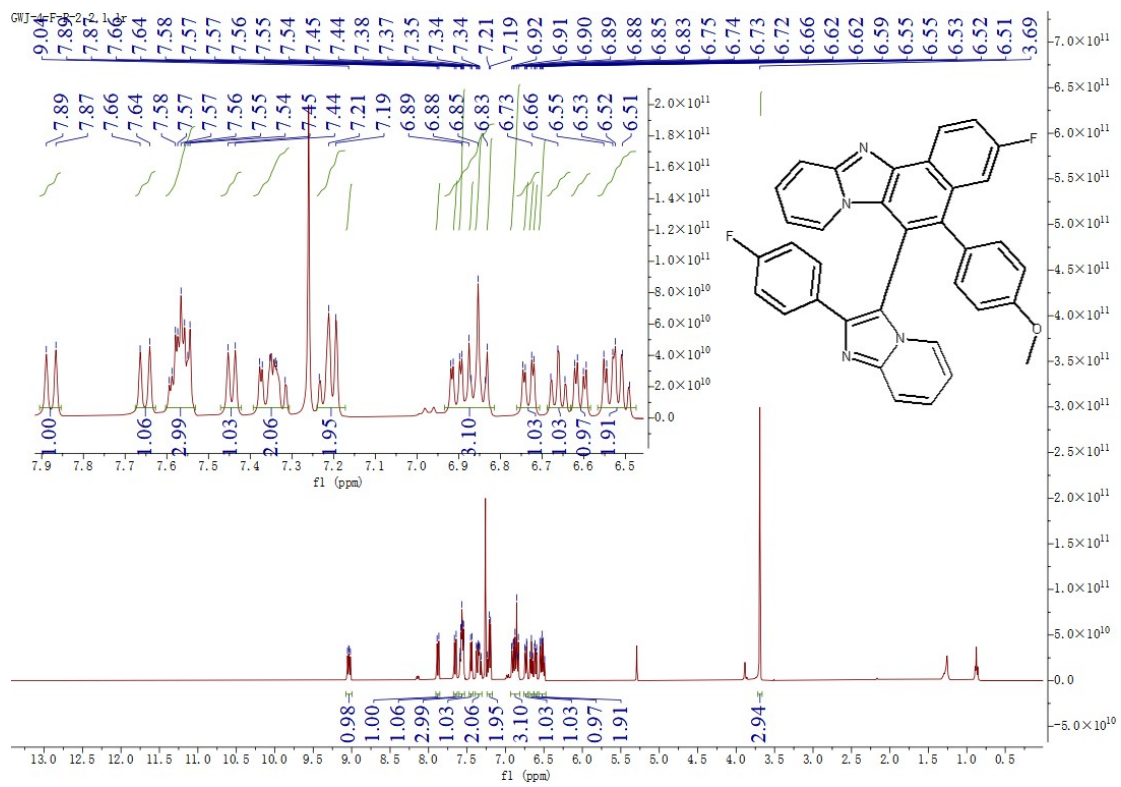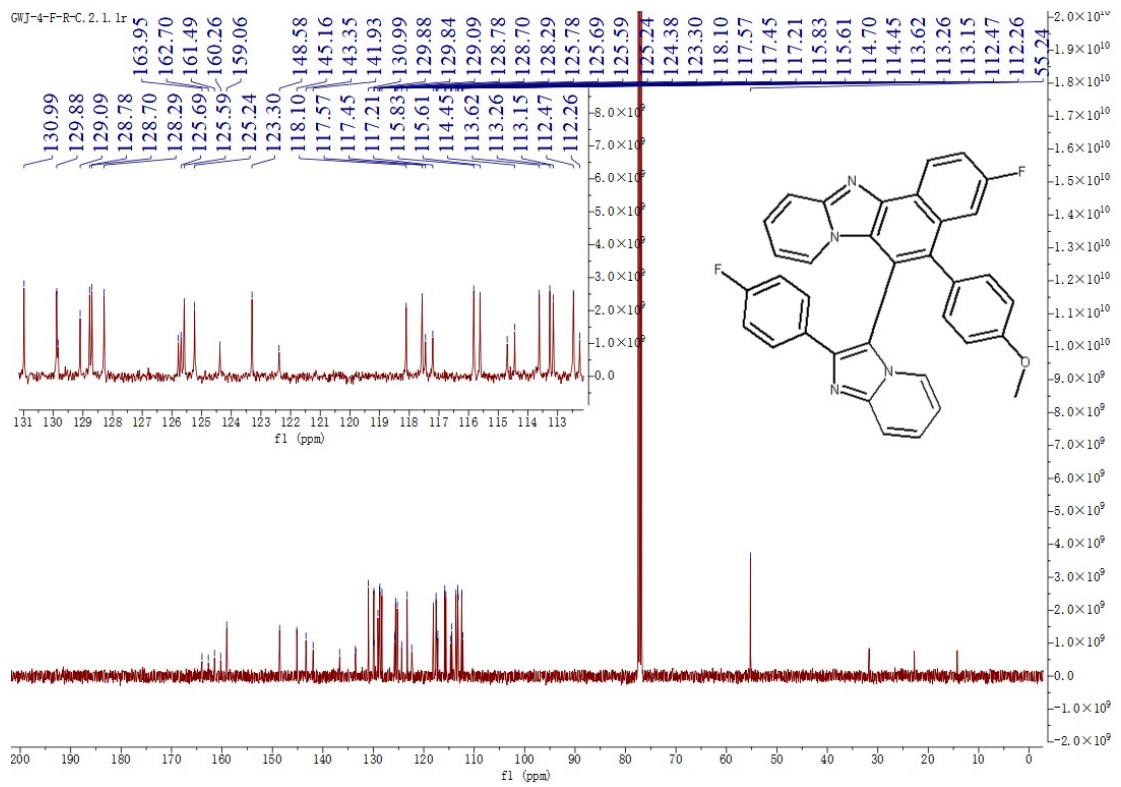

GWJ-4-F-R-F.1.1.1r

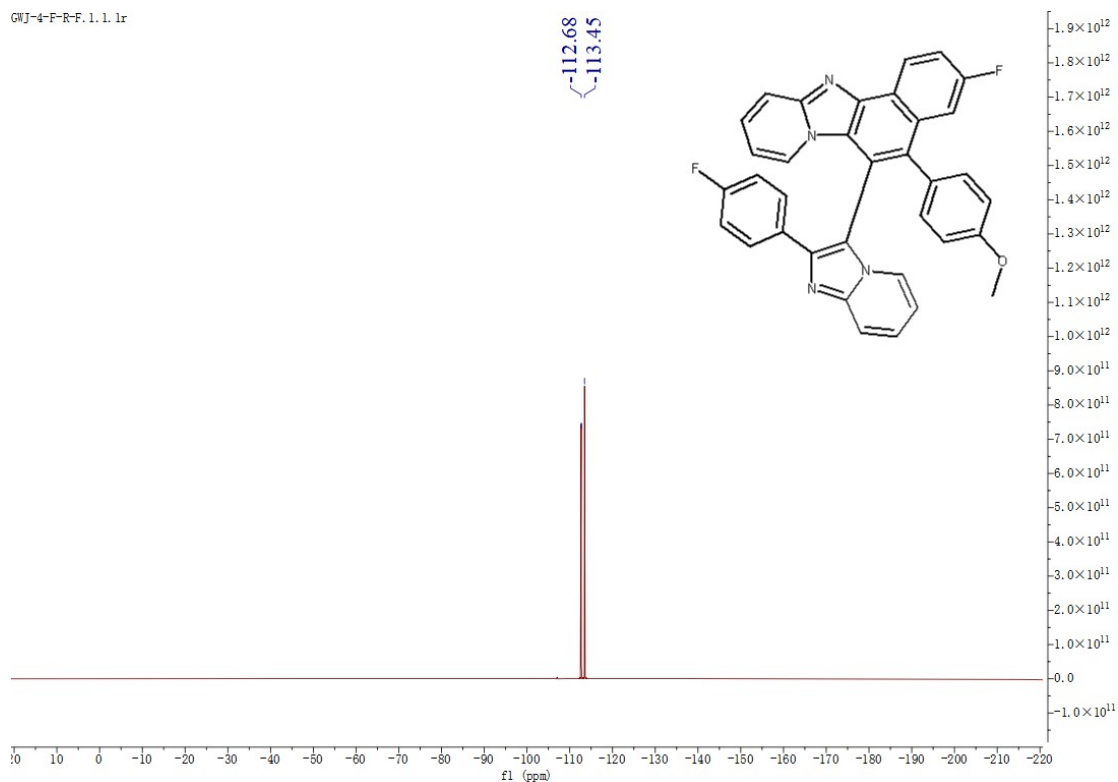

3-chloro-6-(2-(4-chlorophenyl)imidazo[1,2-*a*]pyridin-3-yl)-5-(4-methoxyphenyl)naphtho[1',2':4,5]imidazo[1,2-*a*]pyridine (**33**):

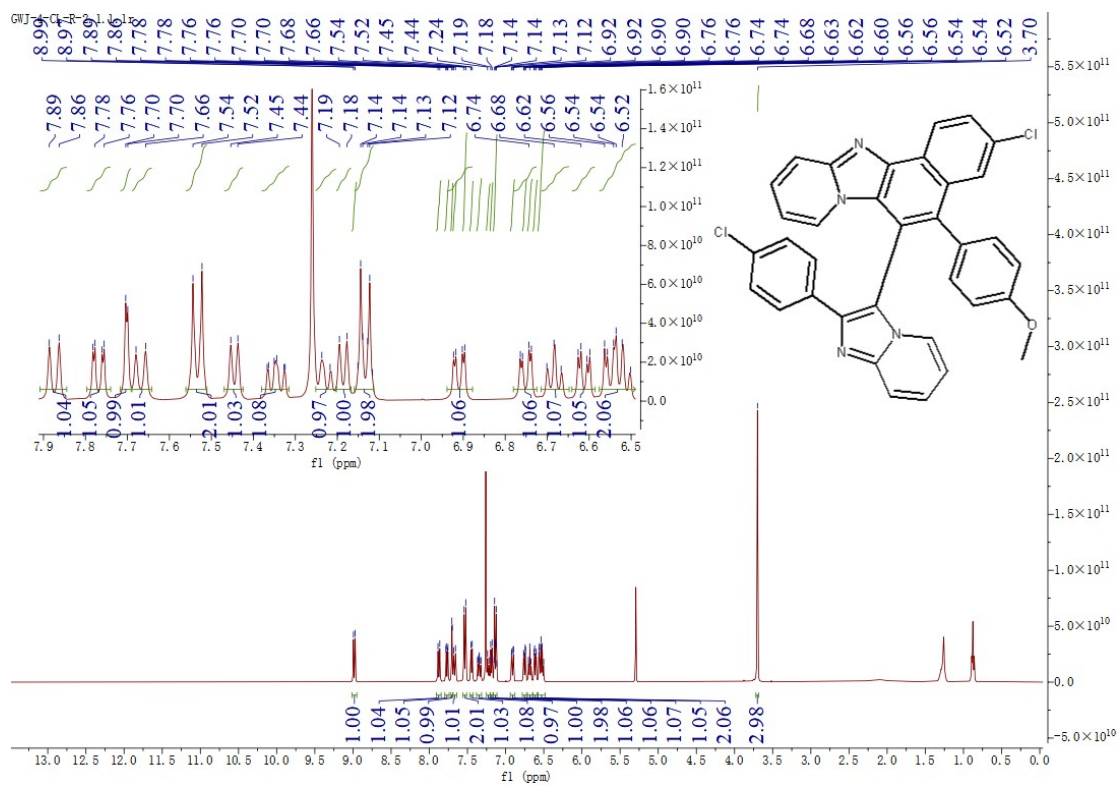



# 7-(4-methoxyphenyl)naphtho[1',2':4,5]imidazo[2,1-b]thiazole (35)

GWJ-5.1.1.1r

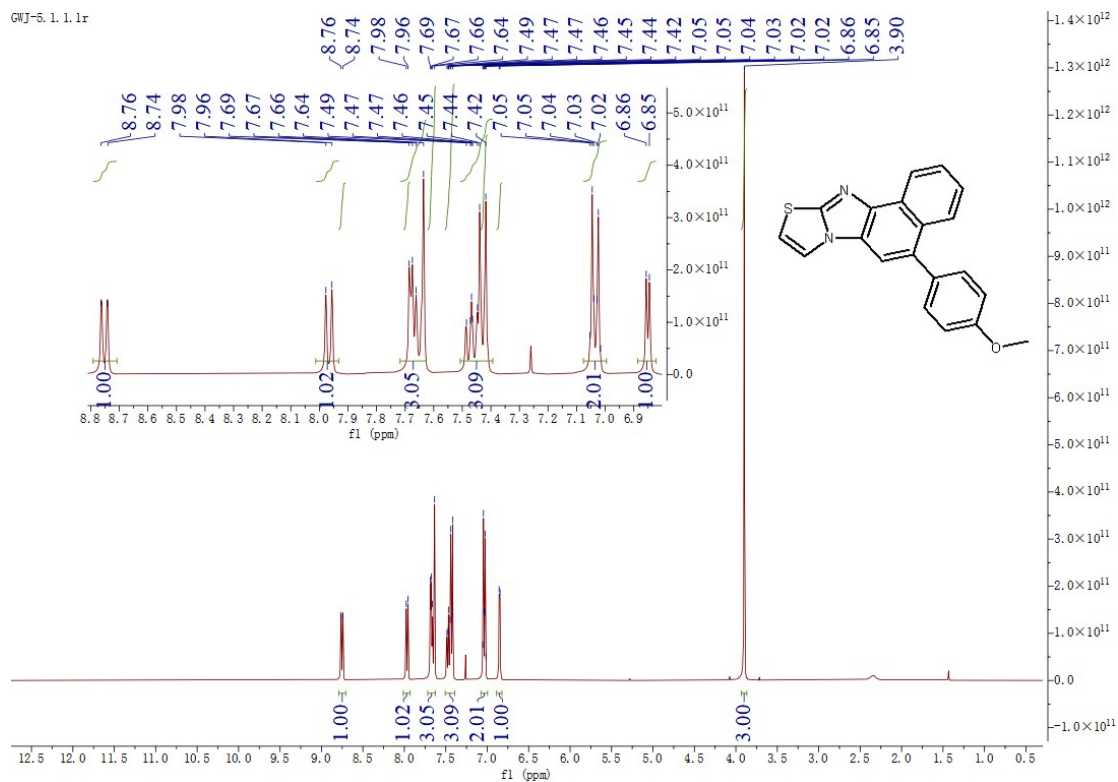

GWJ-5.2.1.1r

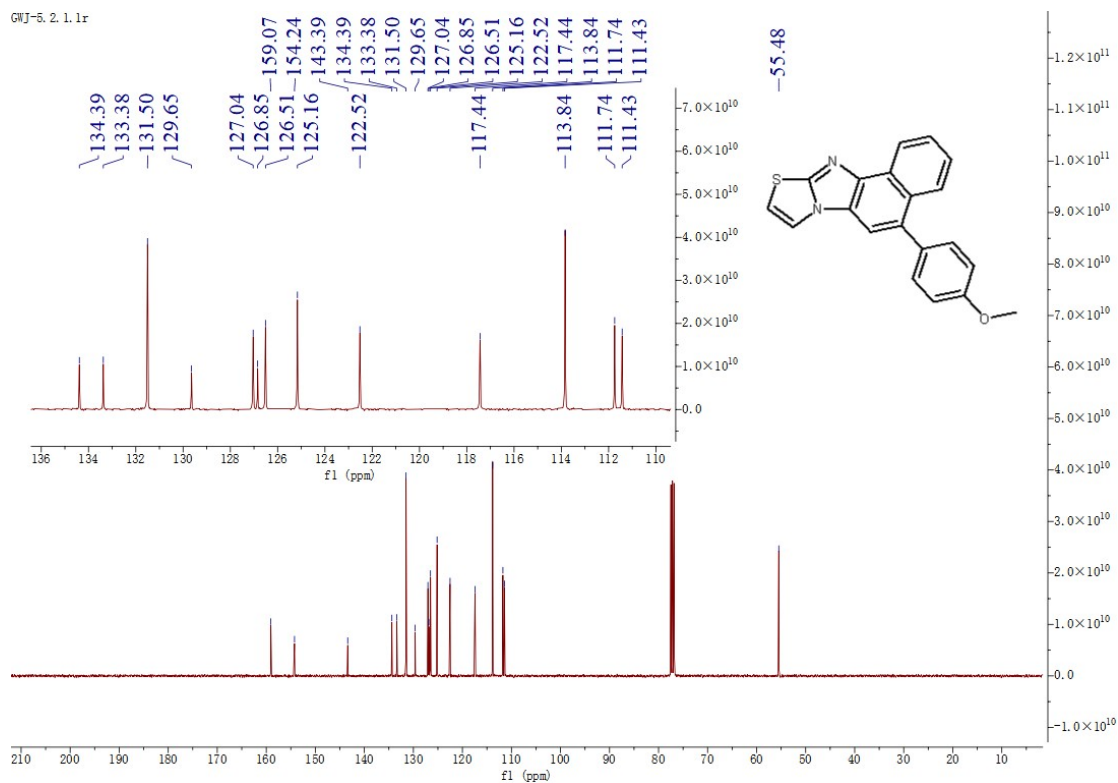





9-chloro-6-(2-chloro-6-phenylimidazo[2,1-*b*]thiazol-5-yl)-5-(4-methoxyphenyl)naphtho[1',2':4,5]imidazo[2,1-*b*]thiazole (**S-5**):

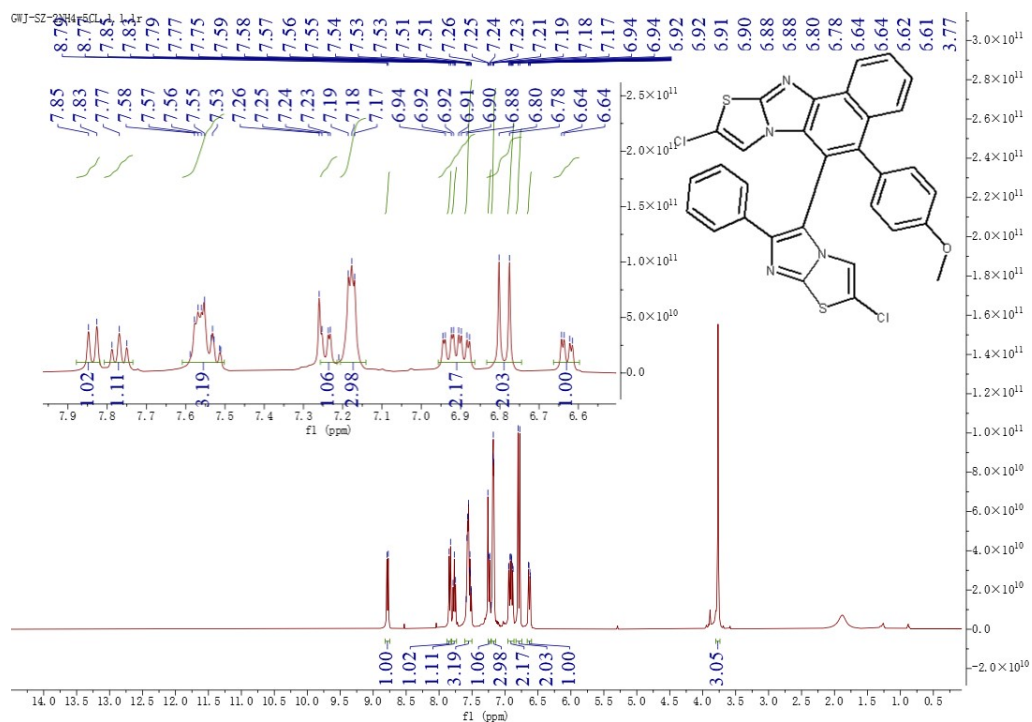

6,6'-bis(4-(benzyloxy)phenyl)-5,5'-biimidazo[2,1-*b*]thiazole (**S-10**)

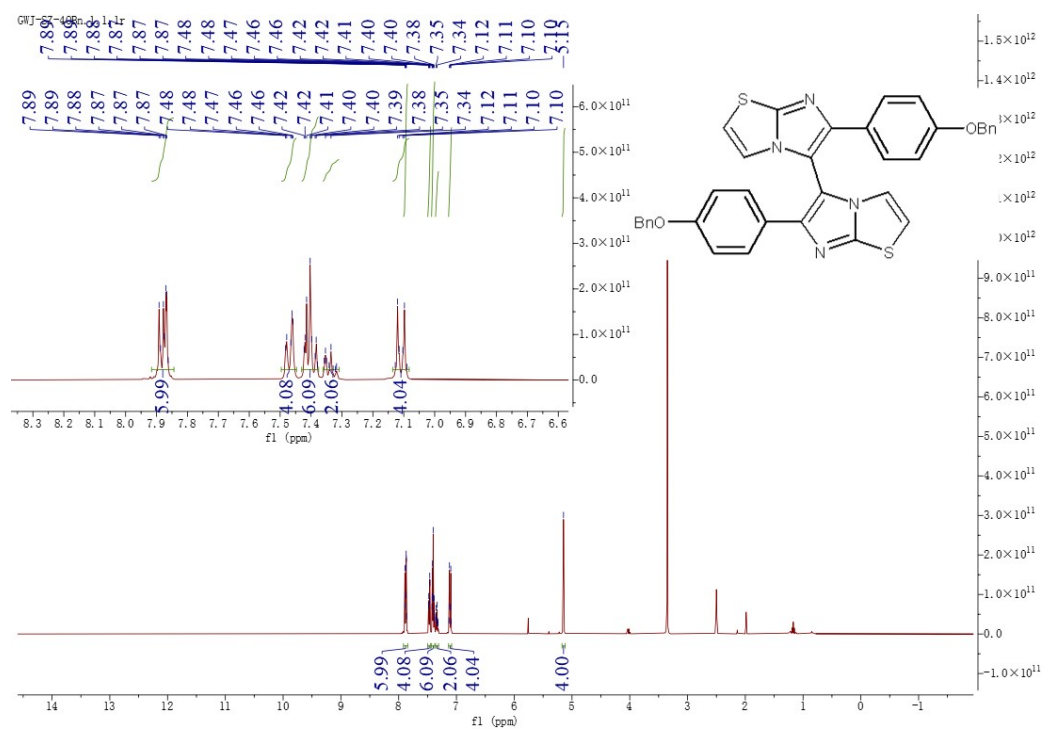

Supplement: d3qo00307h1.pdf [file d3qo00307h1.pdf]
